# Supplementary material for: A machine learning approach for in silico prediction of the photovoltaic properties of perovskite solar cells based on dopant-free hole-transport materials
Source: Royal Society of Chemistry journal article supplement (doi:10.1039/d4nj03777d), 2024-01-01
Supplement: d4nj03777d1.pdf [file d4nj03777d1.pdf]

## Supplementary information

### **A Machine Learning Approach for In-Silico Prediction of Photovoltaic Properties of Perovskite Solar Cells Based on Dopant-Free Hole-Transporting Materials**

Islam M. Abdellah<sup>1,2</sup>, and Ahmed El-Shafei<sup>2\*</sup>

<sup>1</sup>*Department of Chemistry, Faculty of Science, Aswan University, Aswan, Egypt 81528*

<sup>2</sup>*Polymer and Color Chemistry Program, North Carolina State University, Raleigh, USA 27606*

**\*Corresponding Author:** Ahmed El-Shafei, NC State University, *E-Mail:* [amelsha@ncsu.edu](mailto:amelsha@ncsu.edu).

**Table S1:** Photovoltaic properties of dopant-free HTMs fabricated in methylammonium lead halide-based PSCs for conventional (n-i-p) and inverted (p-i-n) devices.

| HTM        | Device                                                                               | Voc [V] | Jsc [mAcm <sup>-2</sup> ] | FF [%] | PCE [%] | Structure                                                                            | Smiles                                                                                                                                                                                                                                                                    |
|------------|--------------------------------------------------------------------------------------|---------|---------------------------|--------|---------|--------------------------------------------------------------------------------------|---------------------------------------------------------------------------------------------------------------------------------------------------------------------------------------------------------------------------------------------------------------------------|
| TAT-2T-CNA | ITO/SnO <sub>x</sub> /PCBA/MAPbI <sub>3</sub> /HTM/VO <sub>x</sub> /Ag               | 1.13    | 23.1                      | 78.0   | 20.1    | 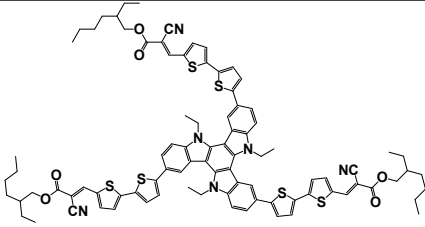   | <chem>CCN(C1=C2C=C(C3=CC=C(C4=CC=C(C/C=C(C#N)/C(OCC(CCCC)CC)=O)S4)S3)C=C1)C5=C2C(N(C)C)C6=C7C=C(C8=CC=C(C9=CC=C(C/C=C(C#N)/C(OCC(CCCC)CC)=O)S9)S8)C=C6=C7C%10=C5C%11=C(C=C(C%12=CC=C(C%13=CC=C(C/C=C(C#N)/C(OCC(CCCC)CC)=O)S%13)S%12)=C%11)N%10CC</chem>                  |
| C-CPDT     | FTO/c-TiO <sub>2</sub> /mp-TiO <sub>2</sub> /MAPbI <sub>3</sub> /HTM/Ag              | 1.14    | 23.27                     | 74.2   | 19.6    |   | <chem>COC(C=C12)=CC=C1N(C3=C2C=C(OC)C=C3)C(C=C4)=CC=C4/C(C5=CC=C(N(C6=CC=C(OC)C=C67)C8=C7C=C(OC)C=C8)C=C5)=C9C%10=C(SC(C%11=CC=C(N(C%12=CC=C(OC)C=C%12)C%13=CC=C(OC)C=C%13)C=C%11)=C%10)C%14=C9C=C(C%15=CC=C(N(C%16=CC=C(OC)C=C%16)C%17=CC=C(OC)C=C%17)C=C%15)S%14</chem> |
| FBA3       | ITO/C <sub>60</sub> /MAPbI <sub>3</sub> Cl <sub>3-x</sub> /HTM/MoO <sub>3</sub> /Ag  | 1.09    | 22.12                     | 0.799  | 19.27   |  | <chem>COC1=CC(N(C2=CC(OC)=CC=C2)C(C=C3)=CC=C3/C=C/C4=CC=C5C6=C4C=CC=C67=C5C=CC(/C=C/C8=CC=C(N(C9=CC(OC)=CC=C9)C%10=CC(OC)=C=C%10)C=C8)=C7)=CC=C1</chem>                                                                                                                   |
| FBA2       | ITO/C <sub>60</sub> /Cl <sub>3-x</sub> /MAPbI <sub>3</sub> /HTM/MoO <sub>3</sub> /Ag | 1.06    | 22.32                     | 79.0   | 18.7    |  | <chem>COC(C=C1)=CC=C1N(C2=CC=C(OC)C=C2)C3=CC=C(/C=C/C(C=C4)=CC5=C4C6=CC=C(/C=C/C7=CC=C(N(C8=CC=C(OC)C=C8)C9=CC=C(OC)C=C9)C=C7)C%10=C6C5=CC=C%10)C=C3</chem>                                                                                                               |
| CJ-01      | FTO/TiO <sub>2</sub> /meso-TiO <sub>2</sub> /MAPbI <sub>3</sub> /HTM/Au              | 1.113   | 22.32                     | 0.747  | 18.56   |  | <chem>COC(C=C1)=CC=C1N(C2=CC=C(OC)C=C2)C3=CC=C(/C=C/C(C=C4)=CC5=CC=C(OC)C=C5)C6=CC=C(OC)C=C6)C=C4)/C7=CC=C(N(C8=CC=C(OC)C=C8)C9=CC=C(OC)C=C9)C=C7)C=C3</chem>                                                                                                             |

|                     |                                                                                      |       |       |       |       |  |                                                                                                                                                                                                                                                                      |
|---------------------|--------------------------------------------------------------------------------------|-------|-------|-------|-------|--|----------------------------------------------------------------------------------------------------------------------------------------------------------------------------------------------------------------------------------------------------------------------|
| <b>TPA-BPFN-TPA</b> | FTO/c-TiO <sub>2</sub> /m-TiO <sub>2</sub> /MAPbI <sub>3</sub> /HTM/Ag               | 1.04  | 22.70 | 78.0  | 18.4  |  | N#C/C(C1=CC=C(C2=CC=C(N(C3=CC=C(OC)C=C3)C4=CC=C(OC)C=C4)C=C2)C=C1)=C(C#N)C(C=C5)=CC=C5C6=CC=C(N(C7=C=C(OC)C=C7)C8=CC=C(OC)C=C8)C=C6                                                                                                                                  |
| <b>ACE-QA-ACE</b>   | FTO/TiO <sub>2</sub> /meso-TiO <sub>2</sub> /MAPbI <sub>3</sub> /HTM/Ag              | 1.06  | 22.41 | 0.77  | 18.2  |  | O=C1C2=C(C=C(C(C(C=C(C3=CC=C4C5=C3C=CC5CC4)C=C6)=C6N7CCCCCCCC)=O)C7=C2)N(CCC(CCCCC)C8=CC=C(C9=CC=C%10C%11=C9C=CC=C%11CC%10)C=C81                                                                                                                                     |
| <b>PCA-1</b>        | FTO/TiO <sub>2</sub> /meso-TiO <sub>2</sub> /MAPbI <sub>3</sub> /HTM/Au              | 1.062 | 22.3  | 0.767 | 18.17 |  | CC(C)(C)C1=CC2=CC(C(C)(C)C)=CC(C3=C4(C5=C(C(C(C)(C)C)=CC6=CC(C(C)(C)C)=CC7=C56)=C7S3)=C2C4=C1                                                                                                                                                                        |
| <b>IDF-SFXPh</b>    | FTO/C <sub>60</sub> /MA-PbI <sub>3-x</sub> Cl <sub>x</sub> /HTM/MoO <sub>3</sub> /Ag | 1.05  | 21.5  | 0.773 | 17.6  |  | COC(C=C1)=CC=C1N(C2=CC(C3(C(C=CC=C4)=C4OC5=C3C=CC=C5)C6=C7C=CC=C6)=C7C=C2)C8=CC(C9(CCCCC)CCCCC)=C(C=C8)C(C9=C%10)=CC%11=C%10C(C=CC(N(C%12=CC(C%13(C(C=CC=C%14)=C%14OC%15=C%13C=CC=C%15)C%16=C%17C=CC=C%16)=C%17C=C%12)C%18=CC=C(OC)C=C%18)=C%19=C%19C%11(CCCCC)CCCCC |
| <b>BTDP</b>         | FTO/c-TiO <sub>2</sub> /m-TiO <sub>2</sub> /MAPbI <sub>3</sub> /BTDP/Ag              | 0.97  | 25.73 | 70.5  | 17.6  |  | O=C(N1CCCCCCCC)C2=C(C3=CC(C=CC=C4)=C4S3)SC(C(S5)=CC6=C5C(SC(C7=C(C(N(CCCCCCCC)C8=O)=O)C8=C(C9=CC%10=C(C=CC=C%10)S9)S7)=C%11)=C%11N6CC(CC)CC=C2C1=O                                                                                                                   |
| <b>TPA-3T-DCV</b>   | ITO/SnO <sub>x</sub> /PCBA/MAPbI <sub>3</sub> /HTM/VO <sub>x</sub> /Ag               | 1.08  | 23.0  | 71.0  | 17.6  |  | CCCCC/C(C1=CC=C(S1)C(S2)=CC=C2C3=CC=C(S3)C4=CC=C(N(C5=CC=C(C6=CC=C(C7=CC=C(C8=CC=C(C(CCCCCC)=C(C#N)C#N)S8)S7)S6)C=C5)C9=CC=C(C%10=CC=C(C%11=CC=C(C%12=CC=C(C(CCCCCC)=C(C#N)/C#N)S%12)S%11)S%10)C=C9)C=C4)=C(C#N)/C#N                                                 |

|                    |                                                                                                             |       |       |           |       |                                                                                      |                                                                                                                                                                                                                                                                             |
|--------------------|-------------------------------------------------------------------------------------------------------------|-------|-------|-----------|-------|--------------------------------------------------------------------------------------|-----------------------------------------------------------------------------------------------------------------------------------------------------------------------------------------------------------------------------------------------------------------------------|
| <b>TAT-2T-DCV</b>  | ITO/SnO <sub>x</sub> /P<br>CBA/MAPbI<br><sub>3</sub> /HTM/VO <sub>x</sub> /<br>Ag                           | 1.08  | 23.0  | 71.0      | 17.6  | 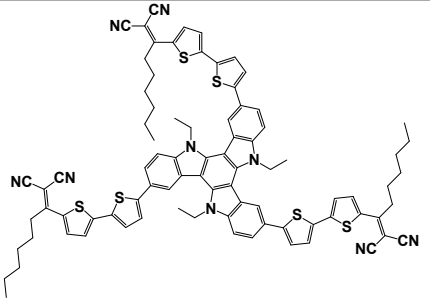   | CCN(C1=C2C=C(C3=CC=C(C4=CC=C(C(C(CCCCC)=C(C#N)C#N)S4)S3)C=C1)C5=C2C(N(CC)C6=C7C=C(C8=CC=C(C9=CC=C(C(C(CCCCC)=C(C#N)C#N)S9)S8)C=C6)=C7C%10=C5C%11=C(C=CC(C%12=CC=C(C%13=CC=C(C(CCCCC)=C(C#N)C#N)S%13)S%12)=C%11)N%10)CC                                                      |
| <b>TPA-ANT-TPA</b> | FTO/TiO <sub>2</sub> /m<br>eso-<br>TiO <sub>2</sub> /MAPbI<br><sub>3</sub> /HT/Ag                           | 1.03  | 21.07 | 0.79<br>6 | 17.5  |    | COC(C=C1)=CC=C1N(C2=CC=C(OC)C=C2)C(C=C3)=CC=C3C4=CC5=C6C(C(C7=C5OCCCCCCCC)=C(C=CC7)C(C8=CC=C(N(C9=CC=C(OC)C=C9)C%10=C=C(OC)C=C%10)C=C8)=C%11)=C%11C(OCCCCC)C=C%12C6C4=CC=C%12                                                                                               |
| <b>BTPA-TCNE</b>   | FTO/SnO <sub>2</sub> /P<br>CBM/MAPb<br>I <sub>3</sub> /HTM/Mo<br>O <sub>3</sub> /Au                         | 1.04  | 20.84 | 0.78<br>2 | 16.94 |   | CC(C=C1)=CC=C1N(C2=C(C=C(C)C=C2)C3=CC=C(C(C4=CC=C(N(C5=CC=C(C)C)C5)C6=CC=C(C)C=C6)C=C4)=C(C(C#N)=C(C#N)C#N)C=C3                                                                                                                                                             |
| <b>BTBDT</b>       | FTO/c-<br>TiO <sub>2</sub> /MAPbI<br><sub>3</sub> /m-<br>TiO <sub>2</sub> /BTDTP<br>/Ag                     | 0.95  | 24.68 | 72.3      | 16.9  |  | O=C(N1CCCCCCCC)C2=C(C3=CC(C=CC=C4)=C4S3)SC(C5=CC6=C(C(OCC(CC)CC)C)C7=CC8=C(C(N(CC(CCCCC)C9=O)=O)C9=C(C%10=CC%11=C(C=CC=C%11)S%10)S8)=CC7=C6OC(CC)CC)S5)=C2C1=O                                                                                                              |
| <b>FBA1</b>        | ITO/C <sub>60</sub> /MA<br>PbI <sub>x</sub> /Cl <sub>3</sub> .<br><sub>x</sub> /HTM/MoO<br><sub>3</sub> /Ag | 1.05  | 21.57 | 74.2      | 16.8  |  | COC1=CC=C(N(C2=CC=C(C3=CC=C4C5=C3C=CC=C5C6=C4C=C(C7=CC=C(C=C7)N(C8=CC=C(C=C8)OC)C9=CC=C(C=C9)OC)C=C6)C=C2)C%10=CC=C(C=C%10)OC)C=C1                                                                                                                                          |
| <b>Z1011</b>       | FTO/TiO <sub>2</sub> /m<br>eso-<br>TiO <sub>2</sub> /MAPbI<br><sub>3</sub> /HTM/Au                          | 1.096 | 20.52 | 0.7       | 16.3  |  | CCCCN(CCCC)C(C=C1)=CC=C1/C=C/C(C=C2)=CC=C2N(C3=CC=C(C=C3)C4=CC=C(N(CCCC)CCCC)C=C4)C=C3)C5=CC=C(C=C5)C6=CC=C(N(C7=CC=C(C=C7)C8=CC=C(C=C8)C9=CC=C(N(C%10=CC=C(C=C9)C%11=CC=C(N(CCCC)CCCC)C=C%11)C=C%10)C%12=CC=C(C=C9)C%13=CC=C(N(CCCC)CCCC)C=C%13)C=C%12)C=C9)C=C8)C=C6)C=C5 |

|                    |                                                                                                       |       |        |      |      |  |                                                                                                                                                                                                                                                   |
|--------------------|-------------------------------------------------------------------------------------------------------|-------|--------|------|------|--|---------------------------------------------------------------------------------------------------------------------------------------------------------------------------------------------------------------------------------------------------|
| <b>Z34</b>         | FTO/TiO <sub>2</sub> /meso-TiO <sub>2</sub> /MAPbI <sub>3</sub> /HTM/Au                               | 1.055 | 21.245 | 0.70 | 16.1 |  | COC(C=C1)=CC=C1N(C2=CC=C(OC)C=C2)C3=CC=C(/C=C/C4=CC=C(N(C5=C/C=C/C6=CC=C(N(C7=CC=C(OC)C=C7)C8=CC=C(OC)C=C8)C=C6)C=C5)C9=CC=C(/C=C/C%10=CC=C(N(C%11=CC=C(OC)C=C%11)C%12=CC=C(OC)C=C%12)C=C%10)C=C9)C=C4)C=C3                                       |
| <b>CQ2</b>         | ITO/SnO <sub>2</sub> /C <sub>60</sub> /MAPbI <sub>3-x</sub> Cl <sub>x</sub> /HTM/MoO <sub>3</sub> /Ag | 1.02  | 20.57  | 72.6 | 15.2 |  | COC(C=C1)=CC=C1N(C2=CC=C(OC)C=C2)C(C=C3)=CC=C3C4=CC5=C(C=C4)SC6=C5C=C(C7=CC=C(N(C8=CC=C(OC)C=C8)C9=CC=C(C(OC)C=C9)C=C7)S6)C=C6                                                                                                                    |
| <b>DTBT</b>        | ITO/SnO <sub>2</sub> /MAPbI <sub>3</sub> /HTM/MoO <sub>3</sub> /Ag                                    | 0.93  | 22.20  | 56.1 | 11.6 |  | COC(C=C1)=CC=C1N(C2=CC=C(OC)C=C2)C(C=C3)=CC=C3C4=CC5=C(S4)C6=C(C=C(C7=CC=C(N(C8=CC=C(OC)C=C8)C9=CC=C(OC)C=C9)C=C7)S6)C%10=NON=C5%10                                                                                                               |
| <b>DTBS</b>        | ITO/SnO <sub>2</sub> /MAPbI <sub>3</sub> /HTM/MoO <sub>3</sub> /Ag                                    | 0.96  | 22.78  | 69.1 | 15.0 |  | COC(C=C1)=CC=C1N(C2=CC=C(OC)C=C2)C(C=C3)=CC=C3C4=CC5=C(S4)C6=C(C=C(C7=CC=C(N(C8=CC=C(OC)C=C8)C9=CC=C(OC)C=C9)C=C7)S6)C%10=N[Se]N=C5%10                                                                                                            |
| <b>DOR3 T-TBDT</b> | ITO/TiO <sub>2</sub> /MAPbI <sub>3-x</sub> Cl <sub>x</sub> /HTM/MoO <sub>3</sub> /Ag                  | 0.97  | 20.7   | 0.74 | 14.9 |  | O=C(/C(S1)=C/C(S2)=CC(CCCCCC)C=C2)C3=CC=C(S3)C(S4)=C(CCCCCC)C=C4C5=CC6=C(C7=C=C(C(C(CCCC)CC)S7)C8=C(C=C(C9=CC(CCCCCC)C=C(C%10=CC=C(C%11=C(CCCCCC)C=C(/C=C%12SC(N(CCCCCC)C%12=O)=S)S%11)S%10)S9)S8)C(C%13=CC=C(C(C(CCC)CC)S%13)=C6S5)N(CCCCCC)C1=S |
| <b>X25</b>         | ITO/SnO <sub>2</sub> /C <sub>60</sub> /MAPbI <sub>3-x</sub> Cl <sub>x</sub> /HTM/MoO <sub>3</sub> /Ag | 1.01  | 19.64  | 72.4 | 14.4 |  | COC(C=C1)=CC=C1N2C(C=CC(C3=CC=C(N(C4=C=C(C(OC)C=C4)C5=CC=C(OC)C=C5)C=C3)=C6=C7=C2C=CC(C8=CC=C(N(C9=CC=C(OC)C=C9)C%10=CC=C(OC)C=C%10)C=C8)=C7                                                                                                      |

|                 |                                                                         |                |                                |               |                |                                                                                      |                                                                                                                                                                                                                                                                                                |
|-----------------|-------------------------------------------------------------------------|----------------|--------------------------------|---------------|----------------|--------------------------------------------------------------------------------------|------------------------------------------------------------------------------------------------------------------------------------------------------------------------------------------------------------------------------------------------------------------------------------------------|
| <b>HTM 1</b>    | FTO/TiO <sub>2</sub> /HTM/Au/MAPI <sub>3</sub> /mp-TiO <sub>2</sub>     | 0.971          | 19.3                           | 0.716         | 13.4           | 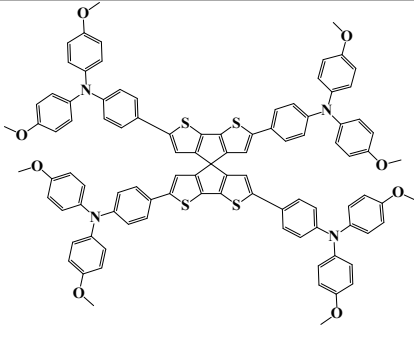   | <chem>COC(C=C1)=CC=C1N(C2=CC=C(OC)C=C2)C(C=C3)=CC=C3C4=CC(C5(C(C=C(C6=CC=C(N(C7=CC=C(OC)C=C7)C8=CC=C(OC)C=C8)C=C6)S9)=C9C%10=C5C=C(C%11=CC=C(N(C%12=CC=C(OC)C=C%12)C%13=CC=C(OC)C=C%13)C=C%11)S%10)C%14=C%15SC(C%16=CC=C(N(C%17=CC=C(OC)C=C%17)C%18=CC=C(OC)C=C%18)C=C%16)=C%14)=C%15S4</chem> |
| <b>DTBF</b>     | ITO/SnO <sub>2</sub> /MAPbI <sub>3</sub> /HTM/MoO <sub>3</sub> /Ag      | 0.95           | 22.48                          | 62.3          | 13.3           |    | <chem>COC(C=C1)=CC=C1N(C2=CC=C(OC)C=C2)C(C=C3)=CC=C3C4=CC5=C(S4)C6=C(C=C(C7=CC=C(N(C8=CC=C(OC)C=C8)C9=CC=C(OC)C=C9)C=C7)S6)C%10=NSN=C5%10</chem>                                                                                                                                               |
| <b>T-CPDT</b>   | FTO/c-TiO <sub>2</sub> /mp-TiO <sub>2</sub> /MAPbI <sub>3</sub> /HTM/Ag | 0.88           | 21.37                          | 60.9          | 11.4           |   | <chem>COC(C=C1)=CC=C1N(C2=CC=C(OC)C=C2)C(C=C3)=CC=C3/C(C4=CC=C(N(C5=CC=C(OC)C=C5)C6=CC=C(OC)C=C6)C=C4)=C7C8=C(SC(C9=CC=C(N(C%10=CC=C(OC)C=C%10)C%11=CC=C(OC)C=C%11)C=C9)=C8)C%12=C7C=C(C%13=CC=C(N(C%14=CC=C(OC)C=C%14)C%15=CC=C(OC)C=C%15)C=C%13)S%12</chem>                                  |
| <b>HTM</b>      | <b>Device configuration</b>                                             | <b>Voc [V]</b> | <b>Jsc [mAcm<sup>-2</sup>]</b> | <b>FF [%]</b> | <b>PCE [%]</b> | <b>Structure</b>                                                                     | <b>Smiles</b>                                                                                                                                                                                                                                                                                  |
| <b>DFBT-MTP</b> | ITO/HTM/MAPbI <sub>3-x</sub> Cl <sub>x</sub> /C <sub>60</sub> /BCP/Ag   | 1.16           | 22.15                          | 82.2          | 21.2           |  | <chem>FC1=C(C2=C(F)C=C(N(C3=CC=C(SC)C=C3)C4=CC=C(SC)C=C4)S2)SC(N(C5=CC=C(SC)C=C5)C6=CC=C(SC)C=C6)=C1</chem>                                                                                                                                                                                    |
| <b>MPA-BTTI</b> | ITO/HTM/CsFAMA/C <sub>60</sub> /BCP/Ag                                  | 1.12           | 23.23                          | 0.814         | 21.17          |  | <chem>O=C(C1=C(C2=C3C4=C(C=C5=CC=C(N(C6=CC=C(OC)C=C6)C7=CC=C(OC)C=C7)C=C5)S4)S2)SC8=C1SC(C9=CC=C(N(C%10=C=C(C(OC)C=C%10)C%11=CC=C(OC)C=C%11)C=C9)=C8)N(CCCCCCCCCCCC)C3=O</chem>                                                                                                                |
| <b>DBTM T</b>   | ITO/HTM/MAPbI <sub>3</sub> /C <sub>60</sub> /BCP/Ag                     | 1.12           | 22.70                          | 83.2          | 21.1           |  | <chem>CSC(C=C1)=CC=C1N(C2=CC=C(SC)C=C2)C3=CC=C4C(C5=C(S4)C=CC(N(C6=CC=C(SC)C=C6)C7=CC=C(SC)C=C7)=C5)=C3</chem>                                                                                                                                                                                 |

|                 |                                                                                                         |      |       |       |      |                                                                                      |                                                                                                                                                                                                               |
|-----------------|---------------------------------------------------------------------------------------------------------|------|-------|-------|------|--------------------------------------------------------------------------------------|---------------------------------------------------------------------------------------------------------------------------------------------------------------------------------------------------------------|
| <b>TPE-S</b>    | ITO/TPE-S/Cs <sub>0.1</sub> FA <sub>0.9</sub> PbI <sub>3</sub> /PCBM/ZnO/Ag                             | 1.13 | 23.3  | 0.797 | 21   | 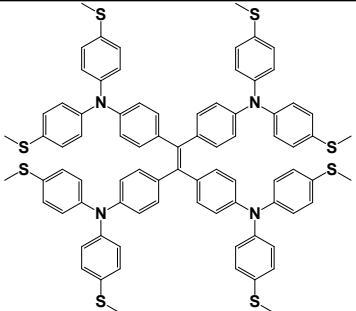   | CSC(C=C1)=CC=C1N(C2=CC=C(SC)C=C2)C(C=C3)=CC=C3/C(C4=CC=C(N(C5=CC=C(SC)C=C5)C6=CC=C(SC)C=C6)C=C4)=C(C7=CC=C(N(C8=CC=C(SC)C=C8)C9=CC=C(SC)C=C9)C=C7)/C%10=CC=C(N(C%11=CC=C(SC)C=C%11)C%12=CC=C(SC)C=C%12)C=C%10 |
| <b>DFH</b>      | ITO/HTM/M <sub>A0.9</sub> FA <sub>0.1</sub> PbI <sub>3-x</sub> Cl <sub>x</sub> /C <sub>60</sub> /BCP/Ag | 1.09 | 22.7  | 0.83  | 20.6 |    | CC(C=C1)=CC=C1N(C2=C(C=C(C)C=C2)C(C=C3C45OCCO5)=CC=C3C6=C4C=C(N(C7=CC=C(C)C=C7)C8=CC=C(C)C=C8)C=C6                                                                                                            |
| <b>DBFM T</b>   | ITO/HTM/M <sub>A</sub> PbI <sub>3</sub> /C <sub>60</sub> /BCP/Ag                                        | 1.07 | 23.70 | 80.4  | 20.5 |    | CSC(C=C1)=CC=C1N(C2=CC=C(SC)C=C2)C3=CC=C4C(C5=C(O4)C=CC(N(C6=CC=C(SC)C=C6)C7=CC=C(SC)C=C7)=C5)=C3                                                                                                             |
| <b>DPh-DNTT</b> | ITO/HTM/M <sub>A</sub> PbI <sub>3</sub> /PC <sub>61</sub> BM/BCP/Ag                                     | 1.10 | 22.56 | 80.0  | 20.1 |    | C1(C(C=C(C=CC(C2=CC=CC=C2)=C3)C3=C4)=C4S5)=C5C(C=C(C=CC(C6=CC=CC=C6)=C7)C7=C8)=C8S1                                                                                                                           |
| <b>BT-MTP</b>   | ITO/HTM/M <sub>A</sub> PbI <sub>3-x</sub> Cl <sub>x</sub> /C <sub>60</sub> /BCP/Ag                      | 1.10 | 23.01 | 79.7  | 20.1 |   | CSC(C=C1)=CC=C1N(C2=CC=C(SC)C=C2)C3=CC=C(S3)C4=CC=C(N(C5=CC=C(SC)C=C5)C6=CC=C(SC)C=C6)S4                                                                                                                      |
| <b>YJ01</b>     | ITO/HTM/M <sub>A</sub> PbI <sub>3</sub> /PC <sub>61</sub> BM/BCP/Ag                                     | 1.08 | 22.53 | 81.5  | 19.8 |  | N#C/C(C1=CC=C(C2=CC=C(N(C3=CC=C(OC)C=C3)C4=CC=C(OC)C=C4)C=C2)C=C1)=C\C5=CC=C(/C=C(C#N)/C6=CC=C(C7=CC=C(N(C8=CC=C(OC)C=C8)C9=CC=C(OC)C=C9)C=C7)C=C6)C=C5                                                       |

|                    |                                                                                                                                                                                 |      |       |           |       |                                                                                      |                                                                                                                                                                                                                                  |
|--------------------|---------------------------------------------------------------------------------------------------------------------------------------------------------------------------------|------|-------|-----------|-------|--------------------------------------------------------------------------------------|----------------------------------------------------------------------------------------------------------------------------------------------------------------------------------------------------------------------------------|
| <b>BDT-POZ</b>     | ITO/HTM/M<br>APbI <sub>3</sub> /PCB<br>M/BCP/Ag                                                                                                                                 | 1.04 | 22.56 | 0.81<br>7 | 19.16 | 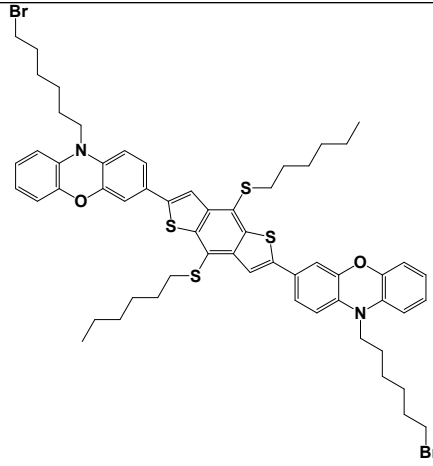   | BrCCCCCN(C(C=CC=C1)=C1O2)C(C2=C3)=CC=C3C(S4)=CC5=C4C(SCCCCCC)=C(C=C(C6=CC=C(N(CCCCCBr)C(C=CC=C7)=C7O8)C8=C6)S9)C9=C5SCCCCC                                                                                                       |
| <b>FMT</b>         | ITO/HTM/M<br>APbI <sub>3</sub> /PCB<br>M/Al                                                                                                                                     | 1.07 | 22.52 | 0.79<br>2 | 19.06 |    | CSC(C=C1)=CC=C1N(C2=CC=C(SC)C=C2)C(C=C3C4(CCCCC)CCCCC)=CC=C3C5=C4C=C(N(C6=CC=C(SC)C=C6)C7=CC=C(SC)C=C7)C=C5                                                                                                                      |
| <b>TAPC</b>        | ITO/HTM/M<br>APbI <sub>3</sub> /PCB<br>M/Ag                                                                                                                                     | 1.04 | 22.32 | 0.81<br>1 | 18.80 |   | COC(C=C1)=CC=C1N(C2=CC=C(OC)C=C2)C3=CC=C(C4(C5=CC=C(N(C6=CC=C(OC)C=C6)C7=CC=C(OC)C=C7)C=C5)CCCC4)C=C3                                                                                                                            |
| <b>XY1</b>         | ITO/HTM/C<br>S <sub>0.05</sub> (MA <sub>0.17</sub> F<br>A <sub>0.83</sub> ) <sub>0.95</sub> Pb(I <sub>0.83</sub> Br <sub>0.17</sub> ) <sub>3</sub> /C <sub>60</sub> /<br>BCP/Ag | 1.11 | 22.21 | 0.76<br>1 | 18.78 |  | COC(C=C1)=CC=C1N(C2=CC=C(OC)C=C2)C(C=C3)=CC=C3C4=C(C5=CC=C(N(C6=CC=C(OC)C=C6)C7=CC=C(OC)C=C7)C=C5)S C8=C4SC(C9=CC=C(N(C%10=CC=C(OC)C=C%10)C%11=CC=C(OC)C=C%11)C=C9)=C8C%12=CC=C(N(C%13=CC=C(OC)C=C%13)C%14=CC=C(OC)C=C%14)C=C%12 |
| <b>VB-MeO-FDPA</b> | ITO/HTMs/P<br>erovskite/PC<br>BM/PEI/Ag                                                                                                                                         | 1.15 | 20.89 | 0.77<br>8 | 18.7  |  | C=CC1=CC=C(CC2(CC3=CC=C(C=C)C=C3)C4=CC(N(C5=CC=C(OC)C=C5)C6=CC=C(OC)C=C6)=CC=C4C7=CC=C(N(C8=CC=C(OC)C=C8)C9=CC=C(OC)C=C9)C=C7)C=C1                                                                                               |



|                     |                                                          |       |       |      |       |                                                                                      |                                                                                                                                                                                                                                            |
|---------------------|----------------------------------------------------------|-------|-------|------|-------|--------------------------------------------------------------------------------------|--------------------------------------------------------------------------------------------------------------------------------------------------------------------------------------------------------------------------------------------|
| <b>Trux-OMeT AD</b> | ITO/HTM/M APbI <sub>3</sub> /PCB M/ZnO NPS/Al            | 1.02  | 23.2  | 0.79 | 18.6  | 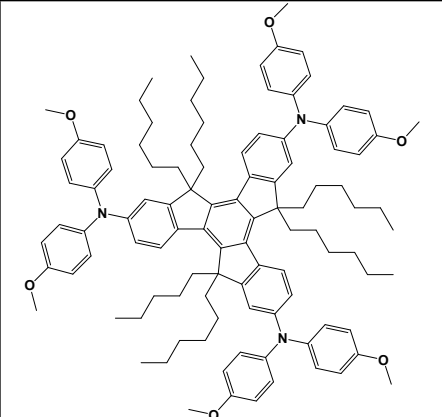   | <chem>COC(C=C1)=CC=C1N(C2=CC=C(OC)C=C2)C(C=C3)=CC4=C3C5=C(C(CCCCCC)(CCCCC)C6=C7C=CC(N(C8=CC=C(OC)C=C8)C9=CC=C(OC)C=C9)=C6)C7=C(C(CCCCCC)(CCCCC)C%10=C%11C=CC(N(C%12=CC=C(OC)C=C%12)C%13=CC=C(OC)C=C%13)=C%10)C%11=C5C4(CCCCCC)CCCCC</chem> |
| <b>H2</b>           | ITO/HTM/M APbI <sub>3</sub> /PC <sub>61</sub> B M/BCP/Ag | 1.06  | 22.93 | 76.9 | 18.6  |    | <chem>FC1=C(N(C2=CC=C(OC)C=C2)C3=CC=C(OC)C=C3)C=C(F)C(C(S4)=CC(C4=C5OCC(CC)CCCC)=C(OC(C)CCCC)C6=C5C=C(C7=CC(F)=C(N(C8=CC=C(OC)C=C8)C9=CC=C(OC)C=C9)C=C7)S6)=C1</chem>                                                                      |
| <b>D106</b>         | ITO/HTM/M APbI <sub>3</sub> /PC <sub>61</sub> B M/BCP/Ag | 1.05  | 22.32 | 77.8 | 18.2  |   | <chem>COC(C=C1)=CC=C1N(C2=CC=C(OC)C=C2)C(C=C3)=CC=C3C4=CC(C5=CC=C(N(C6=CC=C(OC)C=C6)C7=CC=C(OC)C=C7)C=C5)=CC(C8=CC=C(N(C9=CC=C(OC)C=C9)C%10=CC=C(OC)C=C%10)C=C8)=N4</chem>                                                                 |
| <b>m-MTD ATA</b>    | ITO/HTM/M APbI <sub>3</sub> /PCBM/BCP /Cu                | 1.035 | 22.5  | 0.78 | 18.12 |  | <chem>CC(C=C1)=CC=C1N(C2=C=C=CC=C2)C3=CC=C(N(C4=CC=C(N(C5=CC=C(C)C=C5)C6=CC=CC=C6)C=C4)C7=CC=C(N(C8=CC=CC=C8)C9=CC=C(C)C=C9)C=C7)C=C3</chem>                                                                                               |
| <b>TPAC 3M</b>      | ITO/HTM/M APbI <sub>3</sub> /PCB M/ZnO/Al                | 1.00  | 22.79 | 0.78 | 17.54 |  | <chem>COC(C=C1)=CC=C1N2C3=C(C=C=CC=C3)C4=C2C=C(C(N(C5=CC=C(OC)C=C5)C6=CC=C(OC)C=C6)=C4</chem>                                                                                                                                              |

|                          |                                                                       |       |       |      |      |                                                                                      |                                                                                                                                                                                                                                                              |
|--------------------------|-----------------------------------------------------------------------|-------|-------|------|------|--------------------------------------------------------------------------------------|--------------------------------------------------------------------------------------------------------------------------------------------------------------------------------------------------------------------------------------------------------------|
| <b>YJ02</b>              | ITO/HTM/M<br>APbI <sub>3</sub> /PC <sub>61</sub> B<br>M/BCP/Ag        | 1.04  | 22.22 | 75.5 | 17.5 | 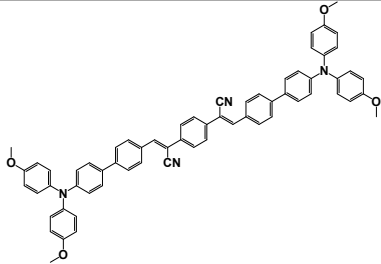   | <chem>COC(C=C1)=CC=C1N(C2=CC=C(OC)C=C2)C(C=C3)=CC=C3C(C=C4)=CC=C4/C=C(C#N)/C5=CC=C(C(C#N)=C/C6=CC=C(C7=CC=C(N(C8=CC=C(OC)C=C8)C9=CC=C(OC)C=C9)C=C7)C=C6)C=C5</chem>                                                                                          |
| <b>D105</b>              | ITO/HTM/M<br>APbI <sub>3</sub> /PC <sub>61</sub> B<br>M/BCP/Ag        | 1.04  | 21.96 | 76.1 | 17.4 |    | <chem>COC1=CC=C(C2=CC(C3=CC=C(N(C4=CC=C(OC)C=C4)C5=CC=C(OC)C=C5)C=C3)=NC(C6=CC=C(N(C7=CC=C(OC)C=C7)C8=CC=C(OC)C=C8)C=C6)=C2)C=C1</chem>                                                                                                                      |
| <b>TPA-2,7-FLTPA-TPA</b> | ITO/MoO <sub>3</sub> /HTM/MAPbI <sub>3</sub> /C <sub>60</sub> /BCP/Ag | 1.052 | 20.82 | 0.78 | 17.1 |   | <chem>COC(C=C1)=CC=C1N(C2=CC=C(OC)C=C2)C(C=C3)=CC=C3C4=CC=C5C6=CC=C(C7=CC=C(N(C8=CC=C(OC)C=C8)C9=CC=C(OC)C=C9)C=C7)C=C6C(C%10=CC=C(N(C%11=CC=C(OC)C=C%11)C%12=CC=C(OC)C=C%12)C=C%10)(C%13=CC=C(N(C%14=CC=CC(OC)=C%14)C%15=CC=C(OC)C=C%15)C=C%13)C5=C4</chem> |
| <b>TTA</b>               | ITO/HTM/M<br>APbI <sub>3</sub> /PCB<br>M/C <sub>60</sub> /BCP/<br>Ag  | 1.04  | 20.4  | 0.78 | 16.7 |  | <chem>O=C(O)C1=CC(C(O)=O)=CC(C2=C(C3=CC(C(O)=O)=CC(C(O)=O)=C3)S/C(S2)=C4S(C5=CC(C(O)=O)=CC(C(O)=O)=C5)=C(C6=C(C(O)=O)=CC(C(O)=O)=C6)S\4)=C1</chem>                                                                                                           |
| <b>TPP-SMeTAD</b>        | ITO/HTM/M<br>APbI <sub>3</sub> /PCB<br>M/ZnO<br>NP <sub>s</sub> /Al   | 1.07  | 20.15 | 0.77 | 16.6 |  | <chem>CC1=C(C2=CC=C(N(C3=C(C=C(SC)C=C3)C4=CC=C(SC)C=C4)C=C2)C(C5=CC=C(N(C6=CC=C(SC)C=C6)C7=CC=C(SC)C=C7)C=C5)=C(C)C(C8=CC=C(N(C9=CC=C(SC)C=C9)C%10=CC=C(SC)C=C%10)C=C8)=C1C%11=CC=C(N(C%12=C(C=C(SC)C=C%12)C%13=C(C=C(SC)C=C%13)C=C%11</chem>                |

|                  |                                                            |      |       |       |       |                                                                                      |                                                                                                                                                                                                                                                                                 |
|------------------|------------------------------------------------------------|------|-------|-------|-------|--------------------------------------------------------------------------------------|---------------------------------------------------------------------------------------------------------------------------------------------------------------------------------------------------------------------------------------------------------------------------------|
| <b>TPA-TVTPA</b> | ITO/HTM/MAPbI <sub>3</sub> /PCBM/BCP/Ag                    | 1.07 | 21.49 | 0.71  | 16.32 | 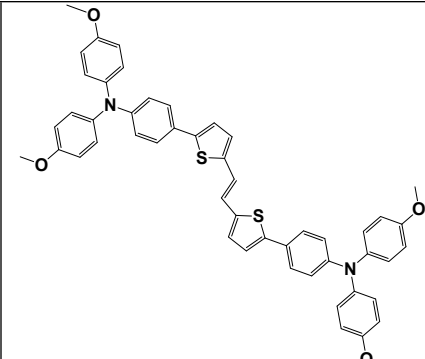   | <chem>COC(C=C1)=CC=C1N(C2=CC=C(OC)C=C2)C(C=C3)=CC=C3C(S4)=CC=C4/C=C/C5=CC=C(C6=CC=C(N(C7=CC=C(OC)C=C7)C8=C=C(OC)C=C8)C=C6)S5</chem>                                                                                                                                             |
| <b>D104</b>      | ITO/HTM/MAPbI <sub>3</sub> /PC <sub>61</sub> BM/BCP/Ag     | 1.05 | 21.22 | 73.4  | 16.2  |    | <chem>COC(C=C1)=CC=C1C2=C(C3=CC=C(N(C4=CC=C(OC)C=C4)C5=CC=C(OC)C=C5)C=C3)=CC(C6=CC=C(OC)C=C6)=N2</chem>                                                                                                                                                                         |
| <b>CzPAF-TPA</b> | ITO/HTM/MAPbI <sub>3</sub> /PCBM/ZnO/Ag                    | 1.05 | 20    | 0.745 | 15.71 |   | <chem>CCCCCCCCC(C1=C2C=C(C3=CC=C(N(C4=CC=C(OC)C=C4)C5=CC=C(OC)C=C5)C=C3)=C1)(CCCCCCCC)C6=C2C=CC(N(C7=CC=C(C(C=CC(C8=CC=C(N(C9=CC=C(OC)C=C9)C%10=CC=C(OC)C=C%10)C=C8)=C%11)=C%11C%12(CCCCCC)CCCCCCCC)C%12=C7)C%13=CC=C(N%14C(C=CC=C%15)=C%15C%16=C%14C=CC=C%16)C=C%13)=C6</chem> |
| <b>TBDI</b>      | ITO/MoO <sub>3</sub> /HTM/MAPbI <sub>3</sub> /IPH/PDINO/Ag | 1.09 | 19.3  | 0.733 | 15.33 |  | <chem>C1(N(CC2=CC=CC=C2)C3=C4C=CC=C3)=C4(N(CC5=CC=CC=C5)C6=C7C=C(C=C6)=C7C8=C1C9=C(C=CC=C9)N8CC%10=CC=CC=C%10</chem>                                                                                                                                                            |
| <b>H0</b>        | ITO/HTM/MAPbI <sub>3</sub> /PC61BM/BCP/Ag                  | 1.02 | 22.87 | 57.3  | 13.3  |  | <chem>CCCCC(CC)COC1=C2C(C=C(C3=CC=C(N(C4=CC=C(OC)C=C4)C5=CC=C(OC)C=C5)C=C3)S2)=C(OCC(C)CCCC)C6=C1C=C(C7=C(C=C(N(C8=CC=C(OC)C=C8)C9=CC=C(OC)C=C9)C=C7)S6</chem>                                                                                                                  |

**Table S2:** Photovoltaic properties of dopant-free HTMs fabricated in mixed cation lead halide-based PSCs for conventional (n-i-p) and inverted (p-i-n) devices.

| HTM      | Device configuration                                                                                                                                                                   | Voc [V] | Jsc [mAcm <sup>-2</sup> ] | FF [%] | PCE [%] | Structure                                                                            | Smiles                                                                                                                                                                                                          |
|----------|----------------------------------------------------------------------------------------------------------------------------------------------------------------------------------------|---------|---------------------------|--------|---------|--------------------------------------------------------------------------------------|-----------------------------------------------------------------------------------------------------------------------------------------------------------------------------------------------------------------|
| Cz-As    | FTO/ c-TiO <sub>2</sub> /mpTiO <sub>2</sub> /PVK:Cz-Py/HTM/Au                                                                                                                          | 1.15    | 25.20                     | 81.2   | 23.5    | 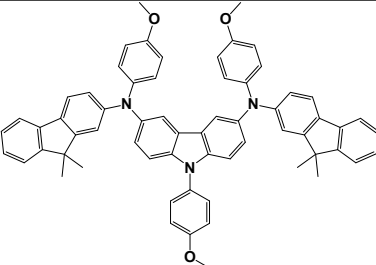   | CC(C1=C2C=CC=C1)(C)C3=C2C=CC(N(C4=CC=C(OC)C=C4)C5=C6=C(C=C5)N(C7=CC=C(OC)C=C7)C8=CC=C(N(C9=CC=C(OC)C=C9)C%10=CC=C(C(C=CC=C%11)=C%11C%12(C)C)C%12=C%10)C=C86)=C3                                                 |
| YZ22     | FTO/TiO <sub>2</sub> /Cs <sub>0.1</sub> FA <sub>0.9</sub> PbI <sub>3</sub> /HTM/Au                                                                                                     | 1.10    | 25.10                     | 81.0   | 22.4    |    | COC(C=C1)=CC=C1N(C(C=C2)=CC=C2C3=C4=CC=C5C(N=CC(C6=CC=C(N(C7=CC=C(OC)C=C7)C8=CC=C(OC)C=C8)C=C6)=C5)C4N=C3)C9=CC=C(OC)C=C9                                                                                       |
| SFDT-TMD | ITO/SnO <sub>2</sub> /Cs <sub>x</sub> FA <sub>1-x</sub> PbI <sub>3</sub> /HTM/MoO <sub>3</sub> /Ag                                                                                     | 1.13    | 24.10                     | 79.5   | 21.7    |   | COC(C=C1)=CC=C1N(C2=CC=C(OC)C=C2)C(C=C3C45SCCS5)=CC=C3C6=C4C(N(C7=CC=C(OC)C=C7)C8=C(C(OC)C=C8)C=C6                                                                                                              |
| DTB-FL   | ITO/SnO <sub>2</sub> /Cs <sub>0.05</sub> FA <sub>0.95</sub> PbI <sub>3</sub> /HTM/MoO <sub>3</sub> /Ag                                                                                 | 1.14    | 23.80                     | 79.1   | 21.5    |  | COC(C=C1)=CC=C1N(C2=CC=C(OC)C=C2)C(C=C3)=CC=C3C4=CC=C(C(C=C5)=CC(C6(CCCCCC)CCCCC)C)=C5C(C=C7)=C6C=C7C8=CC=C(C9=NSN=C98)C%10=CC=C(N(C%11=CC=C(OC)C=C%11)C%12=CC=C(OC)C=C%12)C=C%10)C%13=NSN=C%134                |
| MeOT TVT | FTO/c-TiO <sub>2</sub> /m-TiO <sub>2</sub> /Cs <sub>0.05</sub> (FA <sub>0.85</sub> MA <sub>0.15</sub> ) <sub>0.95</sub> Pb(I <sub>0.85</sub> Br <sub>0.15</sub> ) <sub>3</sub> /HTM/Au | 1.11    | 23.89                     | 80.3   | 21.3    |  | COC(C=C1)=CC=C1N(C2=CC=C(OC)C=C2)C(C=C3)=CC=C3/C=C/C(C=C4)=CC=C4N(C5=CC=C(/C=C/C6=CC=C(N(C7=CC=C(OC)C=C7)C8=CC=C(OC)C=C8)C=C6)C=C5)C9=CC=C(/C=C/C%10=CC=C(N(C%11=CC=C(OC)C=C%11)C%12=CC=C(OC)C=C%12)C=C%10)C=C9 |

|                     |                                                                                                                                                                        |      |       |      |       |                                                                                      |                                                                                                                                                                                                                                                          |
|---------------------|------------------------------------------------------------------------------------------------------------------------------------------------------------------------|------|-------|------|-------|--------------------------------------------------------------------------------------|----------------------------------------------------------------------------------------------------------------------------------------------------------------------------------------------------------------------------------------------------------|
| <b>NiPc</b>         | FTO/ZnO/m-TiO <sub>2</sub> /Cs <sub>0.05</sub> (MA <sub>0.17</sub> FA <sub>0.83</sub> ) <sub>0.95</sub> Pb(I <sub>0.83</sub> Br <sub>0.17</sub> ) <sub>3</sub> /HTM/Au | 1.13 | 23.92 | 78.7 | 21.2  | 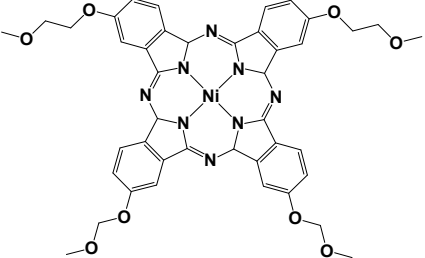   | COCCOC(C=C1)=CC2=C1C3=NC4C(C=CC(OCOC)=C5)=C5C6=NC(C7=C8C=C(C(OCOC)C=C7)N9C8=NC(C%10=C%11C=CC(OCOC)=C%10)N%12C%11=N C2N3[Ni]9%12N46                                                                                                                       |
| <b>DTP-C6Th</b>     | FTO/SnO <sub>2</sub> /C <sub>60</sub> -SAM/MA <sub>0.7</sub> FA <sub>0.3</sub> Pb(I <sub>0.925</sub> Br <sub>0.075</sub> ) <sub>3</sub> /PMMA/HTM/Au                   | 1.15 | 22.76 | 0.79 | 21.04 |    | COC(C=C1)=CC=C1N(C2=CC=C(OC)C=C2)C(C=C3)=CC=C3C(S4)=CC=C4C5=CC=C(S5)C7=C(C=C(C8=CC=C(C9=CC=C(N(C%10=C=C(OC)C=C%10)C%11=CC=C(OC)C=C%11)C=C9)S8)S7)N6C%12=CC=C(CCCCC)S%12                                                                                  |
| <b>TQ4</b>          | FTO/c-TiO <sub>2</sub> /SnO <sub>2</sub> /Cs <sub>0.05</sub> FA <sub>0.85</sub> MA <sub>0.10</sub> Pb(I <sub>0.97</sub> Br <sub>0.03</sub> ) <sub>3</sub> /HTM/Au      | 1.12 | 23.71 | 79.0 | 21.0  |    | COC(C=C1)=CC=C1N(C2=CC=C(OC)C=C2)C(C=C3)=CC=C3C4=C5C(N=C(C6=C7C=CS6)C(C8=C7C=CS8)=N5)=C(C9=CC=C(N(C%10=CC=C(OC)C=C%10)C%11=CC=C(OC)C=C%11)C=C9)C=C4                                                                                                      |
| <b>Cz-As</b>        | FTO/c-TiO <sub>2</sub> /mpTiO <sub>2</sub> /FA <sub>0.9</sub> /MA <sub>0.1</sub> PbI <sub>3</sub> /HTM/Au                                                              | 1.08 | 24.40 | 79.3 | 20.9  |   | CC(C1=C2C=CC=C1)(C)C3=C2C=CC(N(C4=CC=C(OC)C=C4)C5=C6=C(C=C5)N(C7=CC=C(OC)C=C7)C8=CC=C(N(C9=CC=C(OC)C=C9)C%10=CC=C(C(C=CC=C%11)=C%11C%12(C)C)C%12=C%10)C=C86)=C3                                                                                          |
| <b>DTPC13-ThTPA</b> | FTO/SnO <sub>2</sub> /C <sub>60</sub> -SAM/MA <sub>0.7</sub> FA <sub>0.3</sub> PbI <sub>2.85</sub> Br <sub>0.15</sub> /PMMA/HTM/Au                                     | 1.13 | 22.82 | 0.78 | 20.38 |  | CCC(CCCCC)CCCCN1C2=C(SC(C3=CC=C(C4=CC=C(N(C5=CC=C(OC)C=C5)C6=CC=C(OC)C=C6)C=C4)S3)=C2)C7=C1C=C(C8=CC=C(C9=CC=C(N(C%10=CC=C(OC)C=C%10)C%11=CC=C(OC)C=C%11)C=C9)S8)S7                                                                                      |
| <b>Y-T</b>          | FTO/SnO <sub>2</sub> /C <sub>60</sub> -SAM/MA <sub>0.7</sub> FA <sub>0.3</sub> PbI/PEAI/HTM/Au                                                                         | 1.11 | 22.90 | 79.2 | 20.2  |  | COC(C=C1)=CC=C1N(C2=CC=C(OC)C=C2)C(C=C3)=CC=C3C4=CC=C(S4)C(S5)=C(CCCCCCCCC)C6=C5C(N7CC(CCCC)CC)=C(S6)C8=C7C(N(CC(CCCC)CC)C9=C%10SC%11=C9SC(C%12=CC=C(C%13=CC=C(N(C%14=CC=C(OC)C=C%14)C%15=CC=C(OC)C=C%15)C=C%13)S%12)=C%11CCCCCCCCCCC=C%10C%16=NSN=C%168 |

|              |                                                                                                                                                                        |      |       |      |       |                                                                                      |                                                                                                                                                                                                                                                                                 |
|--------------|------------------------------------------------------------------------------------------------------------------------------------------------------------------------|------|-------|------|-------|--------------------------------------------------------------------------------------|---------------------------------------------------------------------------------------------------------------------------------------------------------------------------------------------------------------------------------------------------------------------------------|
| <b>TTE-2</b> | ITO/SnO <sub>2</sub> /(FA PbI <sub>3</sub> ) <sub>0.95</sub> (MAP bBr <sub>3</sub> ) <sub>0.05</sub> /HTM/Au                                                           | 1.11 | 23.26 | 0.77 | 20.04 | 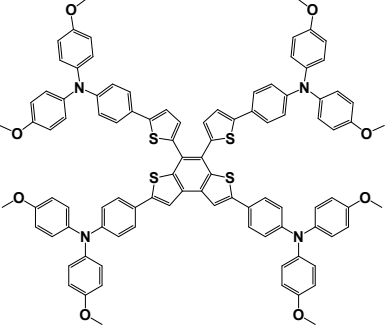   | COC(C=C1)=CC=C1N(C2=CC=C(OC)C=C2)C(C=C3)=CC=C3C4=CC=C(C(S4)C5=C(C6=CC=C(C7=CC=C(N(C8=CC=C(OC)C=C8)C9=CC=C(OC)C=C9)C=C7)S6)C(SC(C%10=CC=C(N(C%11=CC=C(OC)C=C%11)C%12=CC=C(OC)C=C%12)C=C%10)=C%13)=C%13C%14=C5SC(C%15=CC=C(N(C%16=CC=C(OC)C=C%16)C%17=CC=C(OC)C=C%17)C=C%15)=C%14 |
| <b>ZT-H2</b> | ITO/SnO <sub>2</sub> /MA <sub>1-x</sub> FA <sub>x</sub> PbI <sub>3</sub> Cl <sub>3-y</sub> /HTM/MoO <sub>3</sub> /Ag                                                   | 1.11 | 24.15 | 73.4 | 19.6  |    | CCCCCCCCC1=C(CC(CCCC)CC)SC2=C1C3=C(C(SC(C4=CC=C(C(C5=CC=C(OC)C=C5)C6=CC=C(OC)C=C6)C=C4))=C3)C7=CC(C8=C9(CCCCCCCC)=C(CC(CCC)CC)S8)=C(C%10=C9C=C(C%11=CC=C(N(C%12=CC=C(OC)C=C%12)C%13=CC=C(OC)C=C%13)C=C%11)S%10)C=C72                                                            |
| <b>CuPc</b>  | FTO/ZnO/m-TiO <sub>2</sub> /Cs <sub>0.05</sub> (MA <sub>0.17</sub> FA <sub>0.83</sub> ) <sub>0.95</sub> Pb(I <sub>0.83</sub> Br <sub>0.17</sub> ) <sub>3</sub> /HTM/Au | 1.10 | 23.96 | 74.1 | 19.6  |   | COCCOC(C=C1)=CC2=C1C3=NC4C(C=CC(OCOC)=C5)=C5C6=NC(C7=C8C=C(OCOC)C=C7)N9C8=NC(C%10=C%11C=CC(OCOC)=C%10)N%12C%11=NC2N3[Zn]9%12N46                                                                                                                                                 |
| <b>H2Pc</b>  | FTO/ZnO/m-TiO <sub>2</sub> /Cs <sub>0.05</sub> (MA <sub>0.17</sub> FA <sub>0.83</sub> ) <sub>0.95</sub> Pb(I <sub>0.83</sub> Br <sub>0.17</sub> ) <sub>3</sub> /HTM/Au | 1.11 | 23.85 | 74.4 | 19.6  |  | COCCOC(C=C1)=CC2=C1C3=NC4C(C=CC(OCOC)=C5)=C5C6=NC(C7=C8C=C(OCOC)C=C7)N9C8=NC(C%10=C%11C=CC(OCOC)=C%10)N%12C%11=NC2N3[H]9%12N46                                                                                                                                                  |
| <b>WH-1</b>  | FTO/c-TiO <sub>2</sub> /m-TiO <sub>2</sub> /CsMAF APbI <sub>x</sub> Br <sub>3-x</sub> /HTM/Au                                                                          | 1.08 | 23.37 | 77.5 | 19.5  |  | COC(C=C1)=CC=C1N(C2=CC=C(OC)C=C2)C(C=C3)=CC4=C3C5=C(C=C(N(C6=CC=C(OC)C=C6)C7=CC=C(OC)C=C7)C=C5C4(CC8)CC8(C9=C%10C=CC(N(C%11=CC=C(OC)C=C%11)C%12=CC=C(OC)C=C%12)=C9)C%13=C%10C=CC(N(C%14=C(C=C(OC)C=C%14)C%15=CC=C(OC)C=C%15)=C%13                                               |

|                   |                                                                                                                                                                                        |      |       |      |       |                                                                                      |                                                                                                                                                                                                                                                                                                             |
|-------------------|----------------------------------------------------------------------------------------------------------------------------------------------------------------------------------------|------|-------|------|-------|--------------------------------------------------------------------------------------|-------------------------------------------------------------------------------------------------------------------------------------------------------------------------------------------------------------------------------------------------------------------------------------------------------------|
| <b>YN2</b>        | FTO/TiO <sub>2</sub> /meso-TiO <sub>2</sub> /(FAPbI <sub>3</sub> ) <sub>0.85</sub> (MAPbBr <sub>3</sub> ) <sub>0.15</sub> /HTM/Au                                                      | 1.11 | 22.87 | 0.75 | 19.27 | 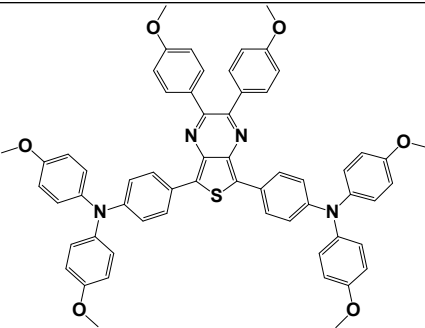   | <chem>COC(C=C1)=CC=C1N(C2=CC=C(OC)C=C2)C3=CC=C(C4=C(N=C(C5=CC=C(OC)C=C5)C(C6=CC=C(OC)C=C6)=N7)C7=C(C8=CC=C(N(C9=CC=C(OC)C=C9)C%10=CC=C(OC)C=C%10)C=C8)S4)C=C3</chem>                                                                                                                                        |
| <b>WH-3</b>       | FTO/c-TiO <sub>2</sub> /m-TiO <sub>2</sub> /Cs <sub>0.05</sub> (FA <sub>0.85</sub> MA <sub>0.15</sub> ) <sub>0.95</sub> Pb(I <sub>0.85</sub> Br <sub>0.15</sub> ) <sub>3</sub> /HTM/Au | 1.07 | 23.05 | 77.9 | 19.2  |    | <chem>CSC1=C(SC)SC(S1)=C(C=C2)=CC=C2N(C3=CC=C(C=C4SC(SC)=C(SC)S4)C=C3)C5=CC=C(C=C6SC(SC)=C(SC)S6)C=C5</chem>                                                                                                                                                                                                |
| <b>KR321</b>      | FTO/TiO <sub>2</sub> /meso-TiO <sub>2</sub> /(FAPbI <sub>3</sub> ) <sub>0.85</sub> (MAPbBr <sub>3</sub> ) <sub>0.15</sub> /HTM/Au                                                      | 1.13 | 21.7  | 0.78 | 19.03 |   | <chem>CCCCCCC1=C(C2=CC=C(C3=C(C4CCCC)C(C/C=C(C#N)/C#N)S3)S2)SC(C4=CC(C(C(N(CCCCC)C5=C6C=C(C7=CC(CCCCC)C(C8=CC=C(C9=C(CCC)C=C(C(C#N)/C#N)S9)S8)S7)C=C5)=C6C%10=C%11C%12=C(C=CC(C%13=CC(CCCCC)=C(C%14=CC=C(C%15=C(CCCCC)C=C(C/C=C(C#N)/C#N)S%15)S%14)S%13)=C%12)N%10CCCCC)=C%11N%16CCCCC)=C%16C=C4)=C1</chem> |
| <b>tpa-t-FBTD</b> | FTO/SnO <sub>2</sub> /(FAPbI <sub>3</sub> ) <sub>0.85</sub> (MAPbBr <sub>3</sub> ) <sub>0.15</sub> /HTM/Au                                                                             | 1.08 | 22.40 | 78.1 | 18.9  |  | <chem>FC1=C(C2=CC=C(C3=CC=C(N(C4=CC=C(OC)C=C4)C5=CC=C(OC)C=C5)C=C3)S2)C6=N(SN=C6C(C(S7)=CC=C7)C8=CC=C(N(C9=CC=C(OC)C=C9)C%10=CC=C(OC)C=C%10)C=C8)C=C1</chem>                                                                                                                                                |

|                               |                                                                                                                                   |      |       |      |      |                                                                                      |                                                                                                                                                                                                                                                                                  |
|-------------------------------|-----------------------------------------------------------------------------------------------------------------------------------|------|-------|------|------|--------------------------------------------------------------------------------------|----------------------------------------------------------------------------------------------------------------------------------------------------------------------------------------------------------------------------------------------------------------------------------|
| <b>FA-CN</b>                  | FTO/TiO <sub>2</sub> /meso-TiO <sub>2</sub> /(FAPbI <sub>3</sub> ) <sub>0.85</sub> (MAPbBr <sub>3</sub> ) <sub>0.15</sub> /HTM/Au | 1.13 | 21.71 | 0.77 | 18.9 | 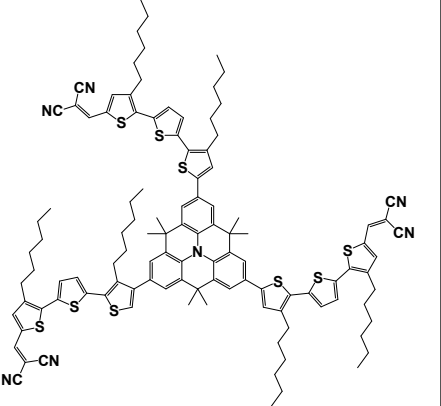   | CC(C1=C2C(C(C)(C)C3=CC(C4=CC(CCCCCC)=C(C5=CC=C(C6=C(C(CCCC)C=C(C=C(C#N)/C#N)S6)S5)S4)=C7)=CC(C8=CSC(C9=CC=C(C%10=C(CCCC)C=C(/C=C(C#N)/C#N)S%10)S9)=C8CCC(CC)=C1)(C)C%11=C(N2C3=C7C%12(C)C)C%12=CC(C%13=CC(CCCCC)=C(C%14=CC=C(C%15=C(CCCCC)C=C(/C=C(C#N)/C#N)S%15)S%14)S%13)=C%11 |
| <b>Y6-T</b>                   | FTO/SnO <sub>2</sub> /C <sub>60</sub> -SAM/MA <sub>0.7</sub> F A <sub>0.3</sub> PbI/PEAL/HTM/Au                                   | 1.10 | 22.90 | 74.1 | 18.8 |    | CCCCCCCCCCCC1=C(C2=CC=C(C3=CC=C(N(C4=CC=C(OC)C=C4)C5=CC=C(OC)C=C5)C=C3)S2)SC6=C1SC7=C6N(CC(CCCC)CC)C8=C7C9=NSN=C9C%10=C8N(CC(CCCC)CC)C%11=C%10SC%12=C%11SC(C%13=CC=C(C%14=CC=C(N(C%15=CC=C(OC)C=C%15)C%16=CC=C(OC)C=C%16)C=C%14)S%13)=C%12CCCCCCCCCCCC                           |
| <b>CuPc-(OMe)<sub>8</sub></b> | FTO/SnO <sub>2</sub> /(FAPbI <sub>3</sub> ) <sub>0.85</sub> (MAPbBr <sub>3</sub> ) <sub>0.15</sub> /HTM/Au                        | 1.05 | 22.10 | 79.0 | 18.3 |   | COC1=CC=C(OC)C2=C1C3N4C2=NC(N5[Cu]674)C(C(OC)=CC=C8OC)=C8C5=NC(C9=C%10C(OC)=CC=C9OC)N6C%10=NC(C%11=C%12C(OC)=CC=C%11OC)N7C%12=N3                                                                                                                                                 |
| <b>Cz-Py</b>                  | FTO/ c-TiO <sub>2</sub> /mpTiO <sub>2</sub> /FA <sub>0.9</sub> /MA <sub>0.1</sub> PbI <sub>3</sub> /HTM/Au                        | 1.13 | 21.90 | 73.7 | 18.2 |  | CC(C1=C2C=CC=C1)(C)C3=C2C=CC(N(C4=CC=C(OC)C=C4)C5=C6=C(C=C5)N(C7=CC=NC=C7)C8=CC=C(N(C9=CC=C(OC)C=C9)C%10=CC=C(C(C=CC=C%11)=C%11C%12(C)C)C%12=C%10)C=C86)=C3                                                                                                                      |
| <b>YZ18</b>                   | FTO/TiO <sub>2</sub> /Cs <sub>0.1</sub> FA <sub>0.9</sub> PbI <sub>3</sub> /HTM/Au                                                | 1.03 | 24.10 | 73.0 | 18.1 |  | COC(C=C1)=CC=C1N(C(C=C2)=CC=C2C3=CC4=C5C=CC(C6=CC=C(N(C7=CC=C(OC)C=C7)C8=CC=C(OC)C=C8)C=C6)=CC5=CCC4=C3)C9=CC=C(OC)C=C9                                                                                                                                                          |



|                            |                                                                                                                                                                         |      |       |      |      |                                                                                      |                                                                                                                                                                                                                                                                             |
|----------------------------|-------------------------------------------------------------------------------------------------------------------------------------------------------------------------|------|-------|------|------|--------------------------------------------------------------------------------------|-----------------------------------------------------------------------------------------------------------------------------------------------------------------------------------------------------------------------------------------------------------------------------|
| <b>C202</b>                | FTO/TiO <sub>2</sub> /meso-TiO <sub>2</sub> /(FAPbI <sub>3</sub> ) <sub>0.85</sub> (MAPbBr <sub>3</sub> ) <sub>0.15</sub> /HTM/Au                                       | 1.05 | 23    | 0.73 | 17.7 | 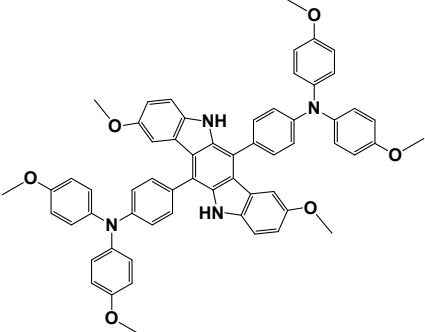   | COC(C=C1)=CC=C1N(C2=CC=C(OC)C=C2)C3=CC=C(C4=C(NC5=C6C=C(OC)C=C5)C6=C(C7=CC=C(N(C8=CC=C(OC)C=C8)C9=CC=C(OC)C=C9)C=C7)C%10=C4C%11=C(C=CC(OC)=C%11)N%10)C=C3                                                                                                                   |
| <b>M129</b>                | ITO/SnO <sub>2</sub> /PCBM/Cs <sub>0.05</sub> (MA <sub>0.17</sub> FA <sub>0.83</sub> ) <sub>0.95</sub> Pb(I <sub>0.83</sub> Br <sub>0.17</sub> ) <sub>3</sub> /HTM/Au   | 1.08 | 22.5  | 0.72 | 17.5 |    | [c3H7]N(C1=CC(C(C=CC=C2)=C2C3(C)C)=C3C=C14)C(C4=C5)=CC=C5C(S6)=CC=C6C7=CC8=C(S7)C9=C(C=C(C%10=CC=C(C%11=C(C%12=C(N(C%13=C%12)C(C(C)C)C%14=C%15)C=CC=C%14)C%15=C%13)CCC)C=C%11)S%10)S9)N8C%16=CC=C(OCCCCC)C=C%16                                                             |
| <b>α, β-COTh-Ph-OMeTAD</b> | FTO/TiO <sub>2</sub> /meso-TiO <sub>2</sub> /(CsPbI <sub>3</sub> ) <sub>0.05</sub> (FAPbI <sub>3</sub> ) <sub>0.79</sub> (MAPbBr <sub>3</sub> ) <sub>0.16</sub> /HTM/Au | 1.05 | 21.51 | 0.76 | 17.2 |   | COC(C=C1)=CC=C1N(C2=CC=C(OC)C=C2)C(C=C3)=CC=C3C4=CC5=C(C6=C(C=C(C7=C(C=C(N(C8=CC=C(OC)C=C8)C9=CC=C(OC)C=C9)C=C7)S6)C%10=C(C%11=C5)C(C%12=CC=C(N(C%13=CC=C(OC)C=C%13)C%14=CC=C(OC)C=C%14)C=C%12)S%11)SC(C%15=CC=C(N(C%16=C(C=C(OC)C=C%16)C%17=CC=C(OC)C=C%17)C=C%15)=C%10)S4 |
| <b>C302</b>                | FTO/c-TiO <sub>2</sub> /m-TiO <sub>2</sub> /(FAPbI <sub>3</sub> ) <sub>0.85</sub> (MAPbBr <sub>0.15</sub> )/HTM/Au                                                      | 1.01 | 23.30 | 69.5 | 16.4 |  | CCC(CCCC)CN1C2=C(C3=C(C4=C5)C=C(C(C=CC=C6)=C6N7CC(C)CCCC)C7=C4)SC(C8=CC=C(CCCCC)C=C8)=C3=C5C=C2C9=C1C=CC=C9                                                                                                                                                                 |
| <b>ZnPc</b>                | FTO/ZnO/m-TiO <sub>2</sub> /Cs <sub>0.05</sub> (MA <sub>0.17</sub> FA <sub>0.83</sub> ) <sub>0.95</sub> Pb(I <sub>0.83</sub> Br <sub>0.17</sub> ) <sub>3</sub> /HTM/Au  | 1.06 | 22.91 | 67.7 | 16.4 |  | COCCOC(C=C1)=CC2=C1C3=NC4C(C=CC(OCCOC)=C5)=C5C6=NC(C7=C8)C=C(OCOC)C=C7)N9C8=NC(C%10=C%11)C=CC(OCOC)=C%10)N%12C%11=N C2N3[Cu]9%12N46                                                                                                                                         |

|                                |                                                                                                                                                                                         |      |       |      |      |                                                                                      |                                                                                                                                                                                                                                                                                    |
|--------------------------------|-----------------------------------------------------------------------------------------------------------------------------------------------------------------------------------------|------|-------|------|------|--------------------------------------------------------------------------------------|------------------------------------------------------------------------------------------------------------------------------------------------------------------------------------------------------------------------------------------------------------------------------------|
| <b>PhCz-4MeO TPA</b>           | FTO/TiO <sub>2</sub> /meso-TiO <sub>2</sub> /Cs <sub>0.05</sub> (MA <sub>0.17</sub> FA <sub>0.83</sub> ) <sub>0.95</sub> Pb(I <sub>0.83</sub> Br <sub>0.17</sub> ) <sub>3</sub> /HTM/Au | 1.08 | 21.52 | 0.69 | 16.0 | 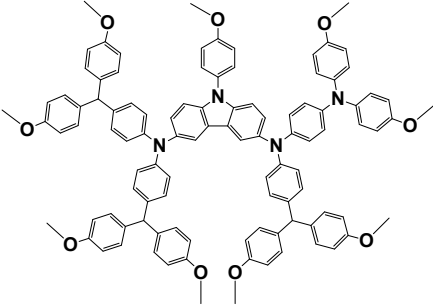   | <chem>COC(C=C1)=CC=C1C(C2=CC=C(OC)C=C2)C(C=C3)=CC=C3N(C4=CC=C(C(C5=CC=C(OC)C=C5)C6=CC=C(OC)C=C6)C=C4)C7=CC(C8=CC(N(C9=CC=C(N(C%10=CC=C(OC)C=C%10)C%11=CC=C(OC)C=C%11)C=C9)C%12=CC=C(C(C%13=CC=C(OC)C=C%13)C%14=C=C(OC)C=C%14)C=C%12)=CC=C8N%15C%16=CC=C(OC)C=C%16)=C%15C=C7</chem> |
| <b>X62</b>                     | FTO/TiO <sub>2</sub> /Mixed-PVK/HTM/Au/meso-TiO <sub>2</sub>                                                                                                                            | 1.01 | 22.4  | 0.70 | 15.9 |   | <chem>COC(C=C1)=CC=C1N(C2=CC=C(OC)C=C2)C(C=C34)=CC=C3C5=C(C=C(N(C6=CC=C(OC)C=C6)C7=CC=C(OC)C=C7)C=C5C84C9=C(C(C=CC=C%10)=C%10C(N(C%11=CC=C(OC)C=C%11)C%12=CC=C(OC)C=C%12)=C9)OC%13=C8C=C(N(C%14=CC=C(OC)C=C%14)C%15=CC=C(OC)C=C%15)C%16=C%13C=C=C%16</chem>                        |
| <b>Spiro-IA</b>                | FTO/cl-TiO <sub>2</sub> /mp-TiO <sub>2</sub> /(FAPbI <sub>3</sub> ) <sub>0.85</sub> (MAPbBr <sub>3</sub> ) <sub>0.15</sub> /HTMs/Au/Ag                                                  | 1.04 | 22.14 | 0.67 | 15.7 |  | <chem>OC1=CC(OC(C=C(O)C=C2)=C2C34C5=C(C6=C4=C(C7=C8OCCOC8=C(C(C=C9)=CC=C9N(C%10=CC=CC=C%10)C%11=CC=C(C=C%11)S7)C=C6)C=CC(C%12=C%13OCCOC%13=C(C(C=C%14)=CC=C%14N(C%15=CC=CC=C%15)C%16=CC=CC=C%16)S%12)=C5)=C3C=C1</chem>                                                            |
| <b>WH-2</b>                    | FTO/c-TiO <sub>2</sub> /m-TiO <sub>2</sub> /Cs <sub>0.05</sub> (FA <sub>0.85</sub> MA <sub>0.15</sub> ) <sub>0.95</sub> Pb(I <sub>0.85</sub> Br <sub>0.15</sub> ) <sub>3</sub> /HTM/Au  | 1.02 | 21.95 | 68.7 | 15.3 |  | <chem>CSC1=C(SC)SC(S1)=C(C=C2)=CC=C2N(C3=CC=C(C=C4SC(SC)=C(SC)S4)C=C3)C5=CC=CC=C5</chem>                                                                                                                                                                                           |
| <b>DBT(QT-TPA)<sub>2</sub></b> | FTO/cl-TiO <sub>2</sub> /mp-TiO <sub>2</sub> /(FAPbI <sub>3</sub> ) <sub>0.85</sub> (MAPbBr <sub>3</sub> ) <sub>0.15</sub> /HTMs/Au/Ag                                                  | 1.04 | 19.23 | 0.68 | 13.6 |  | <chem>CCCCCCC1=C(SC(C2=CC=C(C(C=C2)SC4=C3=C(C(C5=CC(CCCCC)=C(S5)C(S6)=CC=C6C(S7)=CC=C7C8=C(CCCCC)C=C(S8)C(C=C9)=CC=C9N(C%10=CC=CC=C%10)C%11=CC=C(C=C%11)C=C4)=C1)C(S%12)=CC=C%12C(S%13)=CC=C%13C%14=C(CCCC)C=C(S%14)C(C=C%15)=CC=C%15N(C%16=CC</chem>                              |

|                                          |                                                                                                                                                                                  |      |       |      |      |                                                                                      |                                                                                                                                                                                                                                                                                        |
|------------------------------------------|----------------------------------------------------------------------------------------------------------------------------------------------------------------------------------|------|-------|------|------|--------------------------------------------------------------------------------------|----------------------------------------------------------------------------------------------------------------------------------------------------------------------------------------------------------------------------------------------------------------------------------------|
|                                          |                                                                                                                                                                                  |      |       |      |      |                                                                                      | =CC=C%16)C%17=CC=C<br>C=C%17                                                                                                                                                                                                                                                           |
| <b>T(ED<br/>OT-<br/>TPA)<sub>2</sub></b> | FTO/cl-<br>TiO <sub>2</sub> /mp-<br>TiO <sub>2</sub> /(FAPbI <sub>3</sub> )<br>0.85(MAPbBr <sub>3</sub> )<br>0.15/HTMs/Au/<br>Ag                                                 | 1.04 | 20.25 | 0.58 | 12.3 | 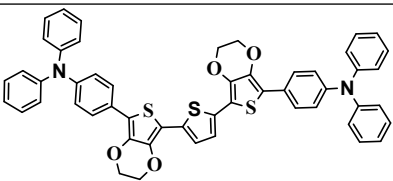   | C1(N(C2=CC=CC=C2)C3=<br>CC=C(C4=C5C(OCCO5)=<br>C(C6=CC=C(C7=C8OCCO<br>C8=C(C(C=C9)=CC=C9N<br>C%10=CC=CC=C%10)C%<br>11=CC=CC=C%11)S7)S6<br>S4)C=C3)=CC=CC=C1                                                                                                                            |
| <b>TB-<br/>DPP</b>                       | ITO/SnO <sub>2</sub> /FA <sub>0</sub><br>.85MA <sub>0.15</sub> PbI <sub>3</sub> /<br>HTMs/MoO <sub>3</sub> /<br>Ag                                                               | 1.03 | 18.97 | 59.4 | 11.6 |    | O=C(N1CC(CCCC)CC)<br>C(C2=C1C3=CC=C(S3<br>)C(S4)=CC=C4C5=CC(<br>C6=CC=C(C7=CSC(C8<br>=C9C(C(N8CC(CCCC<br>CC)=O)=CN(CC(CC)C<br>CCC)C9=O)=C7)S6)=C<br>C(C%10=CC=C(C%11<br>=CC(C%12=C%13C(C<br>N%12CC(CC)CCCC)=<br>O)=CN(CC(CC)CCCC<br>C%13=O)=CS%11)S%<br>10)=C5)=CN(CC(CCC<br>C)CC)C2=O |
| <b>TQ3</b>                               | FTO/c-<br>TiO <sub>2</sub> /SnO <sub>2</sub> /Cs <sub>0</sub><br>.05FA <sub>0.85</sub> MA <sub>0.10</sub><br>Pb(I <sub>0.97</sub> Br <sub>0.03</sub> ) <sub>3</sub> /<br>HTM/Au) | 0.95 | 20.90 | 45.0 | 10.8 |    | COC(C=C1)=CC=C1N(<br>C2=CC=C(OC)C=C2)C<br>(C=C3)=CC=C3C4=C5<br>C(N=C(C6=CC=CS6)C<br>(C7=CC=CS7)=N5)=C<br>C8=CC=C(N(C9=CC=<br>C(OC)C=C9)C%10=CC<br>=C(OC)C=C%10)C=C8<br>)C=C4                                                                                                           |
| <b>ZT-H1</b>                             | ITO/SnO <sub>2</sub> /MA<br>1-xFA <sub>x</sub> PbI <sub>3</sub> Cl <sub>3-y</sub> /<br>y/HTM/MoO <sub>3</sub> /<br>Ag                                                            | 1.00 | 21.21 | 47.6 | 10.0 |   | CCC(CCCC)CC(S1)=C<br>(CCCCCCC)C=C1C2<br>=CC(C3=CC=C(C4=C<br>C=C(N(C5=CC=C(OC)<br>C=C5)C6=CC=C(OC)C<br>=C6)C=C4)S3)=C(C7=<br>CC(CCCCCCCC)=C(C<br>C(CCCC)CC)S7)C=C2<br>C8=CC=C(C9=CC=C(<br>C(C%10=CC=C(OC)C<br>=C%10)C%11=CC=C(<br>OC)C=C%11)C=C9)S8                                     |
| <b>DT-<br/>BT</b>                        | ITO/SnO <sub>2</sub> /Cs <sub>0</sub><br>.05FA <sub>0.95</sub> PbI <sub>3</sub> /H<br>TM/MoO <sub>3</sub> /Ag                                                                    | 0.83 | 16.80 | 52.2 | 7.30 |  | COC(C=C1)=CC=C1N(<br>C2=CC=C(OC)C=C2)C<br>(C=C3)=CC=C3C4=CC<br>=C(C5=CC=C(N(C6=C<br>C=C(OC)C=C6)C7=CC<br>=C(OC)C=C7)C=C5)C<br>8=NSN=C84                                                                                                                                                |
| <b>C301</b>                              | FTO/c-<br>TiO <sub>2</sub> /m-<br>TiO <sub>2</sub> /(FAPbI <sub>3</sub> )<br>0.85(MAPbI <sub>0.1</sub><br>5)/HTM/Au                                                              | 0.73 | 19.60 | 40.6 | 5.8  |  | CCC(CCCC)CN1C2=C<br>C(C3=C(C4=CC=C(C(<br>C=CC=C5)=C5N6CC(<br>CC)CCCC)C6=C4)SC<br>C7=CC=C(CCCCC)C<br>=C7)=C3)=CC=C2C8=<br>C1C=CC=C8                                                                                                                                                     |

|                   |                                                                                                                                                                        |      |       |      |      |                                                                                      |                                                                                                                                                                                                                                                                                                                                |
|-------------------|------------------------------------------------------------------------------------------------------------------------------------------------------------------------|------|-------|------|------|--------------------------------------------------------------------------------------|--------------------------------------------------------------------------------------------------------------------------------------------------------------------------------------------------------------------------------------------------------------------------------------------------------------------------------|
| <b>CoPc</b>       | FTO/ZnO/m-TiO <sub>2</sub> /Cs <sub>0.05</sub> (MA <sub>0.17</sub> FA <sub>0.83</sub> ) <sub>0.95</sub> Pb(1 <sub>0.83</sub> Br <sub>0.17</sub> ) <sub>3</sub> /HTM/Au | 0.96 | 11.03 | 51.3 | 5.4  | 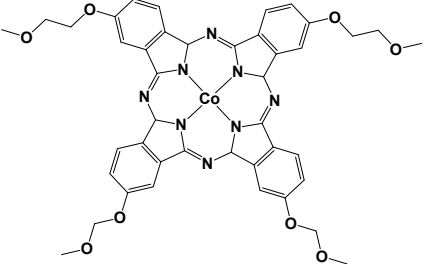   | COCCOC(C=C1)=CC2=C1C3=NC4C(C=CC(OCCOC)=C5)=C5C6=NC(C7=C8C=C(OCOC)C=C7)N9C8=NC(C%10=C%11C=CC(OCOC)=C%10)N%12C%11=N C2N3[Co]9%12N46                                                                                                                                                                                              |
| <b>TPADPP</b>     | ITO/HTM/FA <sub>0.8</sub> Cs <sub>0.2</sub> Pb <sub>1.96</sub> Br <sub>0.04</sub> /C <sub>60</sub> /BCP/Ag                                                             | 1.12 | 23.72 | 83.0 | 21.6 |    | O=C(N1)C(C2=C1C3=CC=C(S3)C4=CC=C(N(C5=CC=C(OC)C=C5)C6=CC=C(OC)C=C6)C=C4)=C(C7=CC=C(C8=CC=C(N(C9=CC=C(OC)C=C9)C%10=CC=C(OC)C=C%10)C=C8)S7)NC2=O                                                                                                                                                                                 |
| <b>MCz-Cz-BTI</b> | ITO/HTM/Cs <sub>3x</sub> MAFAPb <sub>1x</sub> Br <sub>3x</sub> /C <sub>60</sub> /BCP/Ag                                                                                | 1.10 | 23.24 | 83.5 | 21.3 |   | O=C(C1=C(C2=C3C=C(C4=CC=C(N5C6=CC=C(N7C8=CC=C(OC)C=C8C9=C7C=CC(OC)=C9)C=C6C%10=C5C=CC(N(C%11=CC=C(OC)C=C%11%12)C%13=C%12C=C(OC)C=C%13)=C%10)C=C4)S2)SC(C%14=CC=C(N%15C%16=CC=C(N%17C%18=CC=C(OC)C=C%18C%19=C%17C=CC(OC)=C%19)C=C%16C%20=C%15C=CC(N(C%21=CC=C(OC)C=C%21%22)C%23=C%22C=C(OC)C=C%23)=C%20)C=C%14)=C1)N(CCCCC)C3=O |
| <b>BTORCNA</b>    | ITO/HTM/(FA <sub>0.17</sub> MA <sub>0.94</sub> Pb <sub>1.11</sub> ) <sub>0.95</sub> (PbCl <sub>2</sub> ) <sub>3</sub> /C <sub>60</sub> /BCP/Ag                         | 1.10 | 22.84 | 84.0 | 21.1 |  | COC(C=C1)=CC=C1N(C2=CC=C(OC)C=C2)C3=CC=C(C4=C(C#N)C(OCCCCC)=C(C5=C(OCCCCC)C(C#N)=C(C6=CC=C(N(C7=CC=C(OC)C=C7)C8=CC=C(OC)C=C8)C=C6)S5)S4)C=C3                                                                                                                                                                                   |
| <b>MPA-Cz-BTI</b> | ITO/HTM/Cs <sub>3x</sub> MAFAPb <sub>1x</sub> Br <sub>3x</sub> /C <sub>60</sub> /BCP/Ag                                                                                | 1.07 | 22.84 | 85.2 | 20.8 |  | O=C(C1=C(C2=C3C=C(C4=CC=C(N5C6=CC=C(N(C7=CC=C(OC)C=C7)C8=CC=C(OC)C=C8)C=C6C9=C5C=CC(N(C%10=CC=C(OC)C=C%10)C%11=CC=C(OC)C=C%11)=C9)C=C4)S2)SC(C%12=CC=C(N%13C%14=CC=C(N(C%15=CC=C(OC)C=C%15)C%16=CC=C(OC)C=C%16)C=C%14C%17=C%13C=CC(N(C%18=CC=C(OC)C=C%18)C%19=CC=C(OC)C=C%19)=C%17)C=C%12)=C1)N(CCCCC)C3=O                     |

|                   |                                                                                                                                                                      |      |       |      |      |                                                                                      |                                                                                                                                                                                                                                                                                               |
|-------------------|----------------------------------------------------------------------------------------------------------------------------------------------------------------------|------|-------|------|------|--------------------------------------------------------------------------------------|-----------------------------------------------------------------------------------------------------------------------------------------------------------------------------------------------------------------------------------------------------------------------------------------------|
| <b>HTM-F</b>      | ITO/HTM/(FAPbI <sub>3</sub> ) <sub>1-x</sub> (MAPbBr <sub>3</sub> ) <sub>x</sub> /BCP/Ag                                                                             | 1.09 | 23.03 | 82.0 | 20.5 | 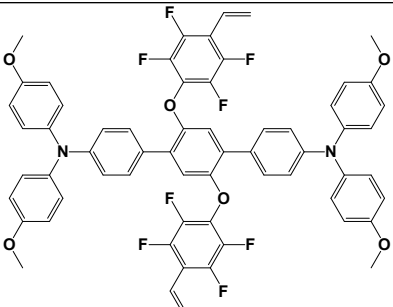   | C=CC1=C(F)C(F)=C(O<br>C2=CC(C3=CC=C(N(C<br>4=CC=C(OC)C=C4)C5<br>=CC=C(OC)C=C5)C=C<br>3)=C(OC6=C(F)C(F)=C<br>(C=C)C(F)=C6F)C=C2<br>C7=CC=C(N(C8=CC=<br>C(OC)C=C8)C9=CC=C<br>(OC)C=C9)C=C7)C(F)<br>=C1F                                                                                         |
| <b>N01</b>        | ITO/HTM/Cs <sub>0.05</sub> (FA <sub>0.95</sub> MA <sub>0.05</sub> ) <sub>3</sub> 0.95Pb(I <sub>0.95</sub> Br <sub>0.05</sub> ) <sub>3</sub> /C <sub>60</sub> /BCP/Ag | 1.08 | 23.65 | 80.1 | 20.4 |    | CCCCCOC1=C2C(C=C<br>C(C3=CC(OC(C=CC=<br>C4)=C4N5CCCCCBr<br>=C5C=C3)S2)=C(OCC<br>CCCC)C6=C1C=C(C7=<br>CC=C(OC(C=CC=C8)=<br>C8N9CCCCCBr)C9=<br>C7)S6                                                                                                                                            |
| <b>BTF6</b>       | ITO/HTM/(FA <sub>0.92</sub> MA <sub>0.08</sub> )Cs <sub>0.1</sub> Pb(I <sub>0.92</sub> Br <sub>0.08</sub> ) <sub>3</sub> /C <sub>60</sub> /BCP/Ag                    | 1.13 | 22.23 | 81.0 | 20.3 |   | N#CC(C=C12)=C(C#N<br>)C3=C1C(C4=C2C=C(<br>C5=CC=C(N(C6=CC=<br>CC(OC)=C6)C7=CC(O<br>C)=CC=C7)C=C5)C=C<br>4)=CC=C3C8=CC=C(N<br>(C9=CC=CC(OC)=C9)<br>C%10=CC(OC)=CC=C<br>%10)C=C8                                                                                                                |
| <b>TPA-FO</b>     | ITO/HTM/(FA <sub>0.17</sub> MA <sub>0.94</sub> PbI <sub>3</sub> ) <sub>0.95</sub> (PbCl <sub>2</sub> ) <sub>0.05</sub> /LiF/C <sub>60</sub> /BCP/Ag                  | 1.09 | 22.76 | 81.8 | 20.2 |  | O=C1C2=C(C3=CC=C(<br>N(C4=CC=C(OC)C=C4<br>)C5=CC=C(OC)C=C5)<br>C=C31)C=CC(N(C6=C<br>C=C(OC)C=C6)C7=CC<br>=C(OC)C=C7)=C2                                                                                                                                                                       |
| <b>BTOR A</b>     | ITO/HTM/(FA <sub>0.17</sub> MA <sub>0.94</sub> PbI <sub>3</sub> ) <sub>0.95</sub> (PbCl <sub>2</sub> ) <sub>0.05</sub> /C <sub>60</sub> /BCP/Ag                      | 1.09 | 22.10 | 83.4 | 20.2 |  | COC(C=C1)=CC=C1N(<br>C2=CC=C(OC)C=C2)C<br>3=CC=C(C4=CC(OCC<br>CCC)=C(C5=C(OCCC<br>CC)C=C(C6=CC=C(N(<br>C7=CC=C(OC)C=C7)C<br>8=CC=C(OC)C=C8)C=<br>C6)S5)S4)C=C3                                                                                                                                |
| <b>MCz-PA-BTI</b> | ITO/HTM/CsMAFAPbI <sub>3</sub> Br <sub>3-x</sub> /C <sub>60</sub> /BCP/Ag                                                                                            | 1.08 | 22.66 | 82.1 | 20.0 |  | O=C(C1=C(C2=C3C=C<br>(C4=CC=C(N(C5=CC=<br>C(N(C6=CC=C(OC)C=<br>C67)C8=C7C=C(OC)C<br>=C8)C=C5)C9=CC=C(<br>N%10C%11=CC=C(O<br>C)C=C%11C%12=C%1<br>0C=CC(OC)=C%12)C=<br>C9)C=C4)S2)SC(C%13<br>=CC=C(N(C%14=CC=<br>C(N(C%15=CC=C(OC)<br>C=C%15%16)C%17=C<br>%16C=C(OC)C=C%17)<br>C=C%14)C%18=CC=C |

|                             |                                                                                                                                                                |      |       |      |      |                                                                                      |                                                                                                                                                                                                                                                                                                                                                                         |
|-----------------------------|----------------------------------------------------------------------------------------------------------------------------------------------------------------|------|-------|------|------|--------------------------------------------------------------------------------------|-------------------------------------------------------------------------------------------------------------------------------------------------------------------------------------------------------------------------------------------------------------------------------------------------------------------------------------------------------------------------|
|                             |                                                                                                                                                                |      |       |      |      |                                                                                      | (N%19C%20=CC=C(O<br>C)C=C%20C%21=C%1<br>9C=CC(OC)=C%21)C=<br>C%18)C=C%13)=C1)N<br>(CCCCC)C3=O                                                                                                                                                                                                                                                                           |
| <b>HTM-<br/>H</b>           | ITO/HTM/(F<br>APbI <sub>3</sub> ) <sub>1-x</sub> (MAPbBr <sub>3</sub> ) <sub>x</sub> /<br>C <sub>60</sub> /BCP/Ag                                              | 1.05 | 22.70 | 80.0 | 19.0 | 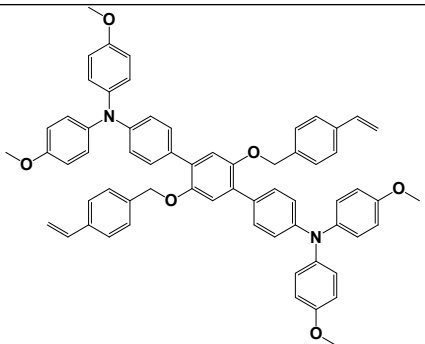   | C=CC(C=C1)=CC=C1<br>COC2=CC(C3=CC=C(<br>N(C4=CC=C(OC)C=C4<br>)C5=CC=C(OC)C=C5)<br>C=C3)=C(OCC6=CC=<br>C(C=C)C=C6)C=C2C7<br>=CC=C(N(C8=CC=C(O<br>C)C=C8)C9=CC=C(OC<br>)C=C9)C=C7                                                                                                                                                                                         |
| <b>N02</b>                  | ITO/HTM/Cs <sub>0.05</sub> (FA <sub>0.95</sub> MA <sub>0.05</sub> )<br>0.95Pb(I <sub>0.95</sub> Br <sub>0.05</sub> ) <sub>2</sub> /C <sub>60</sub> /BCP/A<br>g | 1.03 | 23.48 | 78.3 | 18.9 |    | CCCCCOC1=C2C(C=<br>C(C3=CC(OC)(C=CC=<br>C4)=C4N5CCCCC)=<br>C5C=C3)S2)=C(OCCC<br>CCC)C6=C1C=C(C7=C<br>C=C(OC(C=CC=C8)=C<br>8N9CCCCC)C9=C7)S<br>6                                                                                                                                                                                                                         |
| <b>BTRA</b>                 | ITO/HTM/(F<br>A <sub>0.17</sub> MA <sub>0.94</sub> PbI<br>3.11) <sub>0.95</sub> (PbCl <sub>2</sub> ) <sub>0.05</sub> /<br>C <sub>60</sub> /BCP/Ag              | 1.06 | 21.64 | 80.1 | 18.4 |   | COC(C=C1)=CC=C1N(<br>C2=CC=C(OC)C=C2)C<br>3=CC=C(C4=CC(CCC<br>CCC)=C(C5=C(CCCC<br>CC)C=C(C6=CC=C(N(<br>C7=CC=C(OC)C=C7)C<br>8=CC=C(OC)C=C8)C=<br>C6)S5)S4)C=C3                                                                                                                                                                                                          |
| <b>MPA-<br/>PA-<br/>BTI</b> | ITO/HTM/Cs<br>MAFAPbIxBr<br>3.x<br>/C <sub>60</sub> /BCP/Ag                                                                                                    | 0.99 | 22.15 | 79.4 | 17.4 |  | O=C(C1=C(C2=C3C=C<br>(C4=CC=C(N(C5=CC=<br>C(N(C6=CC=C(OC)C=<br>C6)C7=CC=C(OC)C=C<br>7)C=C5)C8=CC=C(N(<br>C9=CC=C(OC)C=C9)C<br>%10=CC=C(OC)C=C%<br>10)C=C8)C=C4)S2)SC(<br>C%11=CC=C(N(C%12<br>=CC=C(N(C%13=CC=<br>C(OC)C=C%13)C%14=<br>CC=C(OC)C=C%14)C<br>=C%12)C%15=CC=C(<br>N(C%16=CC=C(OC)C<br>=C%16)C%17=CC=C(<br>OC)C=C%17)C=C%15)<br>C=C%11)=C1)N(CCCC<br>CC)C3=O |

|                             |                                                                                                                                                          |      |       |      |      |                                                                                    |                                                                                                                                                                                                                   |
|-----------------------------|----------------------------------------------------------------------------------------------------------------------------------------------------------|------|-------|------|------|------------------------------------------------------------------------------------|-------------------------------------------------------------------------------------------------------------------------------------------------------------------------------------------------------------------|
| <b>TPA-PDO</b>              | ITO/HTM/(F<br>A <sub>0.17</sub> MA <sub>0.94</sub> PbI<br>3.11) <sub>0.95</sub> (PbCl <sub>2</sub> ) <sub>0</sub><br>.05/LiF/C <sub>60</sub> /BC<br>P/Ag | 1.03 | 20.44 | 80.9 | 17.0 | 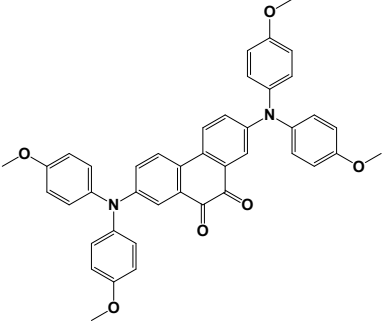 | O=C(C1=O)C2=C(C=C<br>C(N(C3=CC=C(OC)C=C<br>3)C4=CC=C(OC)C=C<br>4)=C2)C5=C1C=C(N(C<br>6=CC=C(OC)C=C6)C7<br>=CC=C(OC)C=C7)C=C<br>5                                                                                  |
| <b>TPAD<br/>PP-<br/>Boc</b> | ITO/HTM/FA<br>0.8Cs <sub>0.2</sub> PbI <sub>2.96</sub> B<br>r <sub>0.04</sub> /C <sub>60</sub> /BCP/<br>Ag                                               | 1.02 | 22.22 | 72.0 | 16.3 |  | O=C(N1C(OC(C)(C)C)<br>=O)C(C2=C1C3=CC=C<br>(S3)C4=CC=C(N(C5=C<br>C=C(OC)C=C5)C6=CC<br>=C(OC)C=C6)C=C4)=<br>C(C7=CC=C(C8=CC=<br>C(N(C9=CC=C(OC)C=C<br>C9)C%10=CC=C(OC)C<br>=C%10)C=C8)S7)N(C(<br>OC(C)(C)C)=O)C2=O |
| <b>BTF5</b>                 | ITO/HTM/(F<br>A <sub>0.92</sub> MA <sub>0.08</sub> )Cs<br>0.1Pb(I <sub>0.92</sub> Br <sub>0.08</sub><br>) <sub>3</sub> /C <sub>60</sub> /BCP/Ag          | 0.80 | 21.31 | 67.0 | 11.4 |  | COC(C=C1)=CC=C1N(<br>C2=CC=C(OC)C=C2)C<br>3=CC=C(C4=CC=C5C<br>6=C4C(C#N)=C(C#N)<br>C=C6C7=C5C=CC(C8<br>=CC=C(N(C9=CC=C(O<br>C)C=C9)C%10=CC=C(<br>OC)C=C%10)C=C8)C<br>7)C=C3                                       |

**Table (S3):** Experimental and predicted PCE,  $V_{OC}$ , and  $J_{SC}$  values for the test and train sets for dopant free HTMs when used in PSCs devices utilizing 1D, and 2D descriptors.

| HTM                 | PCE   |         |          |         | $V_{oc}$ |         |          |        | $J_{sc}$ |         |          |        |
|---------------------|-------|---------|----------|---------|----------|---------|----------|--------|----------|---------|----------|--------|
|                     | Set   | Y (Obs) | Y (Pred) | Error   | Set      | Y (Obs) | Y (Pred) | Error  | Set      | Y (Obs) | Y (Pred) | Error  |
| <b>TAT-2T-CAN</b>   | train | 20.1    | 17.8324  | -2.2676 | train    | 1.13    | 1.1006   | 0.0294 | test     | 23.1    | 23.0397  | 0.0603 |
| <b>C-CPDT</b>       | test  | 19.6    | 16.9849  | -2.6151 | train    | 1.14    | 1.0166   | 0.1234 | train    | 23.27   | 22.6329  | 0.6371 |
| <b>FBA3</b>         | train | 19.27   | 16.1334  | -3.1366 | train    | 1.09    | 1.1156   | 0.0256 | train    | 22.12   | 21.0126  | 1.1074 |
| <b>FBA2</b>         | test  | 18.7    | 17.0126  | -1.6874 | train    | 1.06    | 1.0259   | 0.0341 | train    | 22.32   | 21.8086  | 0.5114 |
| <b>CJ-01</b>        | train | 18.56   | 18.1964  | -0.3636 | train    | 1.113   | 1.0477   | 0.0653 | train    | 22.32   | 22.3518  | 0.0318 |
| <b>TPA-BPFN-TPA</b> | train | 18.4    | 19.3958  | 0.9959  | train    | 1.04    | 1.0272   | 0.0128 | train    | 22.7    | 22.4605  | 0.2395 |
| <b>ACE-QA-ACE</b>   | train | 18.2    | 19.4204  | 1.2204  | train    | 1.06    | 1.0468   | 0.0132 | train    | 22.41   | 22.5908  | 0.1808 |
| <b>PCA-1</b>        | train | 18.17   | 18.0004  | -0.1697 | test     | 1.062   | 1.0517   | 0.0103 | test     | 22.3    | 22.5158  | 0.2158 |
| <b>IDF-SFXPh</b>    | test  | 17.6    | 18.9861  | 1.3861  | test     | 1.05    | 1.0678   | 0.0178 | test     | 21.5    | 21.9417  | 0.4417 |
| <b>BTDT</b>         | train | 17.6    | 17.742   | 0.142   | train    | 0.97    | 1.0146   | 0.0446 | train    | 25.73   | 24.7221  | 1.0079 |
| <b>TPA-3T-DCV</b>   | train | 17.6    | 17.7235  | 0.1235  | test     | 1.08    | 1.0946   | 0.0146 | test     | 23      | 21.7325  | 1.2675 |
| <b>TAT-2T-DCV</b>   | train | 17.6    | 18.0348  | 0.4348  | train    | 1.08    | 1.1094   | 0.0294 | train    | 23      | 22.7035  | 0.2965 |
| <b>TPA-ANT-TPA</b>  | train | 17.5    | 17.8301  | 0.3301  | test     | 1.03    | 1.0317   | 0.0017 | train    | 21.07   | 21.7921  | 0.7221 |
| <b>BTPA-TCNE</b>    | train | 16.94   | 18.8084  | 1.8684  | test     | 1.04    | 1.0468   | 0.0068 | train    | 20.84   | 20.8297  | 0.0103 |
| <b>BTBDT</b>        | train | 16.9    | 17.2279  | 0.3279  | train    | 0.95    | 0.9917   | 0.0417 | test     | 24.68   | 24.3215  | -      |

|                          |       |       |         |         |       |       |        |        |       |        |         |        |
|--------------------------|-------|-------|---------|---------|-------|-------|--------|--------|-------|--------|---------|--------|
|                          |       |       |         |         |       |       |        |        |       |        |         | 0.3585 |
| <b>FBA1</b>              | test  | 16.8  | 16.7927 | -0.0073 | train | 1.05  | 0.9845 | 0.0655 | train | 21.57  | 22.025  | 0.455  |
| <b>Z1011</b>             | train | 16.3  | 16.9216 | 0.6216  | train | 1.096 | 1.0742 | 0.0218 | test  | 20.52  | 21.2274 | 0.7074 |
| <b>Z34</b>               | train | 16.1  | 18.4876 | 2.3876  | train | 1.055 | 1.0867 | 0.0317 | train | 21.245 | 21.8401 | 0.5951 |
| <b>CQ2</b>               | train | 15.2  | 17.05   | 1.85    | train | 1.02  | 1.0087 | 0.0113 | train | 20.57  | 22.3313 | 1.7613 |
| <b>DTBT</b>              | train | 11.6  | 16.1696 | 4.5696  | train | 0.93  | 0.9959 | 0.0659 | test  | 22.2   | 22.6803 | 0.4803 |
| <b>DTBS</b>              | train | 15    | 14.4899 | -0.5101 | train | 0.96  | 0.9087 | 0.0513 | train | 22.78  | 22.4247 | 0.3553 |
| <b>DOR3T-TBDT</b>        | train | 14.9  | 14.2318 | -0.6682 | train | 0.97  | 0.9899 | 0.0199 | train | 20.7   | 21.1596 | 0.4596 |
| <b>X25</b>               | train | 14.4  | 18.1915 | 3.7915  | train | 1.01  | 1.0431 | 0.0331 | train | 19.64  | 22.2926 | 2.6526 |
| <b>HTM1</b>              | train | 13.4  | 17.4857 | 4.0857  | train | 0.971 | 1.0416 | 0.0706 | train | 19.3   | 21.4981 | 2.1981 |
| <b>DTBF</b>              | test  | 13.3  | 15.8713 | 2.5713  | test  | 0.95  | 0.994  | 0.044  | train | 22.48  | 22.5984 | 0.1184 |
| <b>T-CPDT</b>            | train | 11.4  | 16.5162 | 5.1162  | train | 0.88  | 0.9588 | 0.0788 | train | 21.37  | 22.0527 | 0.6827 |
| <b>DFBT-MTP</b>          | test  | 21.2  | 20.8406 | -0.3594 | test  | 1.16  | 1.1466 | 0.0134 | train | 22.15  | 22.542  | 0.392  |
| <b>MPA-BTTI</b>          | train | 21.17 | 19.9824 | -1.1876 | train | 1.12  | 1.1037 | 0.0163 | train | 23.23  | 23.3242 | 0.0942 |
| <b>DBTMT</b>             | test  | 21.1  | 21.0342 | -0.0659 | train | 1.12  | 1.1301 | 0.0101 | train | 22.7   | 22.978  | 0.278  |
| <b>TPE-S</b>             | train | 21    | 20.0462 | -0.9538 | train | 1.13  | 1.0958 | 0.0341 | train | 23.3   | 22.338  | -0.962 |
| <b>DFH</b>               | train | 20.6  | 20.1701 | -0.4299 | train | 1.09  | 1.0878 | 0.0022 | test  | 22.7   | 22.8006 | 0.1006 |
| <b>DBFMT</b>             | test  | 20.5  | 20.7966 | 0.2966  | train | 1.07  | 1.0948 | 0.0248 | test  | 23.7   | 22.9038 | 0.7962 |
| <b>DPh-DNTT</b>          | train | 20.1  | 16.97   | -3.1301 | train | 1.1   | 1.1147 | 0.0147 | train | 22.56  | 21.7938 | 0.7662 |
| <b>BT-MTP</b>            | train | 20.1  | 21.1694 | 1.0694  | train | 1.1   | 1.1357 | 0.0357 | train | 23.01  | 23.0812 | 0.0712 |
| <b>YJ01</b>              | train | 19.8  | 19.2874 | -0.5126 | train | 1.08  | 1.0476 | 0.0324 | train | 22.53  | 22.6554 | 0.1254 |
| <b>BDT-POZ</b>           | test  | 19.16 | 17.9635 | -1.1965 | train | 1.04  | 1.0629 | 0.0229 | train | 22.56  | 22.8774 | 0.3174 |
| <b>FMT</b>               | train | 19.06 | 19.3605 | 0.3005  | test  | 1.07  | 1.0611 | 0.0089 | train | 22.52  | 22.1675 | 0.3525 |
| <b>TAPC</b>              | train | 18.8  | 17.5165 | -1.2835 | train | 1.04  | 0.9889 | 0.0511 | test  | 22.32  | 21.6082 | 0.7118 |
| <b>XY1</b>               | train | 18.78 | 17.0954 | -1.6846 | train | 1.11  | 1.0373 | 0.0727 | train | 22.21  | 21.8969 | 0.3131 |
| <b>VB-MeO-FDPA</b>       | train | 18.7  | 18.8392 | 0.1393  | train | 1.15  | 1.1056 | 0.0444 | train | 20.89  | 21.5061 | 0.6161 |
| <b>Trux-OMeTAD</b>       | train | 18.6  | 17.6879 | -0.9121 | train | 1.02  | 0.9976 | 0.0224 | train | 23.2   | 21.3787 | 1.8213 |
| <b>H2</b>                | train | 18.6  | 18.7745 | 0.1745  | train | 1.06  | 1.077  | 0.017  | train | 22.93  | 23.8954 | 0.9654 |
| <b>D106</b>              | train | 18.2  | 18.6385 | 0.4385  | train | 1.05  | 1.0689 | 0.0189 | train | 22.32  | 22.5691 | 0.2491 |
| <b>m-MTDATA</b>          | train | 18.12 | 17.7387 | -0.3813 | train | 1.035 | 1.0131 | 0.0219 | test  | 22.5   | 21.3542 | 1.1458 |
| <b>TPAC3M</b>            | train | 17.54 | 17.4647 | -0.0753 | train | 1     | 1.0061 | 0.0061 | train | 22.79  | 22.0671 | 0.7229 |
| <b>YJ02</b>              | train | 17.5  | 18.8715 | 1.3715  | train | 1.04  | 1.0379 | 0.0021 | train | 22.22  | 22.4353 | 0.2153 |
| <b>D105</b>              | train | 17.4  | 17.2494 | -0.1506 | train | 1.04  | 1.0295 | 0.0105 | test  | 21.96  | 22.1226 | 0.1626 |
| <b>TPA-2,7-FLTPA-TPA</b> | train | 17.1  | 16.888  | -0.212  | test  | 1.052 | 0.9958 | 0.0562 | train | 20.82  | 20.9445 | 0.1245 |
| <b>TTA</b>               | test  | 16.7  | 17.4256 | 0.7256  | test  | 1.04  | 1.0014 | 0.0386 | train | 20.4   | 19.078  | -1.322 |
| <b>TPP-SMeTAD</b>        | train | 16.6  | 19.7769 | 3.1769  | train | 1.07  | 1.0719 | 0.0019 | train | 20.15  | 22.0702 | 1.9202 |



|                     |       |       |         |         |       |      |        |        |       |       |         |        |
|---------------------|-------|-------|---------|---------|-------|------|--------|--------|-------|-------|---------|--------|
| TPA-TVT-TPA         | train | 16.32 | 17.3436 | 1.0236  | train | 1.07 | 1.0574 | -      | train | 21.49 | 22.5209 | 1.0309 |
| D104                | train | 16.2  | 16.9034 | 0.7034  | train | 1.05 | 1.0552 | 0.0052 | train | 21.22 | 21.6551 | 0.4352 |
| CzPAF-TPA           | train | 15.71 | 17.1064 | 1.3964  | train | 1.05 | 1.0052 | -      | train | 20    | 21.4196 | 1.4196 |
| TBDI                | test  | 15.33 | 14.613  | -0.717  | test  | 1.09 | 1.0325 | 0.0575 | train | 19.3  | 19.9255 | 0.6255 |
| H0                  | train | 13.3  | 15.7115 | 2.4115  | train | 1.02 | 1.0242 | 0.0042 | test  | 22.87 | 22.4008 | -      |
| YZ22                | train | 22.4  | 18.5943 | -3.8057 | train | 1.1  | 1.0287 | -      | train | 25.1  | 22.9657 | 2.1344 |
| SFDT-TMD            | train | 21.7  | 19.82   | -1.88   | test  | 1.13 | 1.0821 | 0.0479 | train | 24.1  | 22.8018 | -      |
| MeOTTVT             | train | 21.3  | 18.6516 | -2.6484 | test  | 1.11 | 1.082  | -0.028 | train | 23.89 | 22.0943 | -      |
| DTP-C6Th            | train | 21.04 | 18.3689 | -2.6711 | train | 1.15 | 1.135  | -0.015 | train | 22.76 | 22.4859 | -      |
| TQ4                 | train | 21    | 17.4246 | -3.5754 | test  | 1.12 | 1.0451 | -      | train | 23.71 | 23.1179 | -      |
| Cz-As               | train | 20.9  | 20.2878 | -0.6122 | train | 1.08 | 1.112  | 0.032  | train | 24.4  | 23.2912 | -      |
| DTPC13-ThTPA        | train | 20.38 | 16.1654 | -4.2146 | train | 1.13 | 1.0811 | -      | test  | 22.82 | 22.4389 | -      |
| TTE-2               | train | 20.04 | 17.9211 | -2.1189 | train | 1.11 | 1.08   | -0.03  | train | 23.26 | 21.8766 | -      |
| ZT-H2               | train | 19.6  | 15.7288 | -3.8712 | train | 1.11 | 1.0644 | -      | train | 24.15 | 21.977  | -      |
| CuPc                | train | 19.6  | 18.8228 | -0.7772 | test  | 1.1  | 1.0203 | 0.0797 | test  | 23.96 | 21.7782 | -      |
| H2Pc                | train | 19.6  | 17.3385 | -2.2615 | train | 1.11 | 1.1369 | 0.0269 | train | 23.85 | 22.7267 | -      |
| WH-1                | train | 19.5  | 19.5156 | 0.0156  | train | 1.08 | 1.0507 | -      | train | 23.37 | 22.4898 | -      |
| YN2                 | train | 19.27 | 17.3787 | -1.8913 | test  | 1.11 | 1.0719 | 0.0381 | train | 22.87 | 22.5403 | -      |
| WH-3                | train | 19.2  | 16.6974 | -2.5026 | train | 1.07 | 1.1018 | 0.0318 | train | 23.05 | 21.9045 | -      |
| tpa-t-FBTD          | train | 18.9  | 17.016  | -1.884  | train | 1.08 | 1.0279 | -      | train | 22.4  | 23.0922 | -      |
| FA-CN               | test  | 18.9  | 19.4296 | 0.5296  | train | 1.13 | 1.1312 | 0.0012 | train | 21.71 | 21.5253 | -      |
| Y6-T                | train | 18.8  | 15.4636 | -3.3364 | train | 1.1  | 1.1081 | 0.0081 | train | 22.9  | 22.5659 | -      |
| Cz-Py               | test  | 18.2  | 19.9092 | 1.7092  | train | 1.13 | 1.1251 | -      | train | 21.9  | 23.2368 | -      |
| YZ18                | test  | 18.1  | 18.3234 | 0.2234  | train | 1.03 | 1.0335 | 0.0035 | train | 24.1  | 22.3597 | -      |
| C202                | train | 17.7  | 17.8157 | 0.1157  | train | 1.05 | 1.0337 | -      | train | 23    | 22.8405 | -      |
| ?, ?-COTh-Ph-OMeTAD | test  | 17.2  | 17.4095 | 0.2095  | train | 1.05 | 1.0422 | 0.0078 | train | 21.51 | 21.4492 | -      |
| C302                | train | 16.4  | 12.376  | -4.0239 | train | 1.01 | 0.8884 | -      | test  | 23.3  | 21.9045 | -      |
| PhCz-4MeOTPA        | train | 16    | 15.6281 | -0.3719 | test  | 1.08 | 1.0116 | 0.0684 | train | 21.52 | 20.9704 | -      |
| X62                 | test  | 15.9  | 18.9536 | 3.0536  | test  | 1.01 | 1.0691 | 0.0591 | train | 22.4  | 21.8445 | -      |
| Spiro-IA            | train | 15.7  | 14.5533 | -1.1467 | train | 1.04 | 1.0398 | -      | train | 22.14 | 21.3648 | -      |
| WH-2                | train | 15.3  | 15.1298 | -0.1702 | train | 1.02 | 1.0444 | 0.0244 | train | 21.95 | 21.3362 | -      |
| 2 DBT(QT-TPA)2      | test  | 13.6  | 14.39   | 0.79    | train | 1.04 | 1.0324 | -      | train | 19.23 | 20.5078 | -      |
| T(EDOT-TPA)2        | train | 12.3  | 12.4157 | 0.1157  | train | 1.04 | 1.0613 | 0.0213 | test  | 20.25 | 21.9342 | -      |
| TQ3                 | train | 10.8  | 16.4994 | 5.6994  | test  | 0.95 | 1.0327 | 0.0827 | test  | 20.9  | 22.5634 | -      |
| ZT-H1               | test  | 10    | 15.1471 | 5.1471  | train | 1    | 1.0386 | 0.0386 | train | 21.21 | 21.3449 | -      |

|                   |       |      |         |         |       |      |        |        |       |       |         |        |
|-------------------|-------|------|---------|---------|-------|------|--------|--------|-------|-------|---------|--------|
| <b>DT-BT</b>      | train | 7.3  | 15.6685 | 8.3685  | train | 0.83 | 0.9445 | 0.1145 | train | 16.8  | 21.8383 | 5.0383 |
| <b>C301</b>       | train | 5.8  | 11.6077 | 5.8077  | train | 0.73 | 0.8536 | 0.1236 | test  | 19.6  | 21.7014 | 2.1014 |
| <b>TPADPP</b>     | train | 21.6 | 19.2952 | -2.3048 | train | 1.12 | 1.102  | -0.018 | train | 23.72 | 23.3602 | 0.3598 |
| <b>MCz-cz-BTI</b> | train | 21.3 | 20.8192 | -0.4808 | train | 1.1  | 1.1218 | 0.0218 | train | 23.24 | 23.7344 | 0.4944 |
| <b>BTORCNA</b>    | train | 21.1 | 19.2282 | -1.8718 | train | 1.1  | 1.1099 | 0.0099 | train | 22.84 | 22.9254 | 0.0854 |
| <b>MPA-CZ-PTI</b> | train | 20.8 | 20.6149 | -0.1851 | train | 1.07 | 1.0962 | 0.0262 | train | 22.84 | 22.8684 | 0.0284 |
| <b>HTM-F</b>      | train | 20.5 | 22.7403 | 2.2403  | train | 1.09 | 1.1039 | 0.0139 | train | 23.03 | 23.065  | 0.035  |
| <b>N01</b>        | train | 20.4 | 18.628  | -1.772  | train | 1.08 | 1.086  | 0.006  | train | 23.65 | 23.4852 | 0.1648 |
| <b>BTF6</b>       | train | 20.3 | 16.854  | -3.446  | train | 1.13 | 1.0505 | 0.0795 | train | 22.23 | 21.1777 | 1.0523 |
| <b>TPA-FO</b>     | train | 20.2 | 19.5266 | -0.6734 | train | 1.09 | 1.0407 | 0.0493 | train | 22.76 | 22.3817 | 0.3783 |
| <b>BTORA</b>      | test  | 20.2 | 18.5789 | -1.6211 | train | 1.09 | 1.131  | 0.041  | train | 22.1  | 22.5987 | 0.4987 |
| <b>MCZ-PA-PTI</b> | test  | 20   | 20.5523 | 0.5523  | train | 1.08 | 1.1097 | 0.0297 | train | 22.66 | 23.4954 | 0.8354 |
| <b>HTM-H</b>      | train | 19   | 19.492  | 0.492   | train | 1.05 | 1.1133 | 0.0633 | train | 22.7  | 22.3928 | 0.3072 |
| <b>N02</b>        | train | 18.9 | 17.4714 | -1.4286 | train | 1.03 | 1.0363 | 0.0063 | train | 23.48 | 23.156  | -0.324 |
| <b>BTRA</b>       | train | 18.4 | 17.4402 | -0.9598 | train | 1.06 | 1.074  | 0.014  | test  | 21.64 | 21.9771 | 0.3371 |
| <b>MPA-PA-BTI</b> | train | 17.4 | 19.6867 | 2.2867  | test  | 0.99 | 1.0479 | 0.0579 | train | 22.15 | 22.2812 | 0.1313 |
| <b>TPA-PDO</b>    | train | 17   | 19.6477 | 2.6477  | train | 1.03 | 1.0175 | 0.0125 | train | 20.44 | 22.3833 | 1.9433 |
| <b>TPADPP-Boc</b> | train | 16.3 | 16.8979 | 0.5979  | train | 1.02 | 1.013  | -0.007 | train | 22.22 | 22.6217 | 0.4017 |
| <b>BTF5</b>       | train | 11.4 | 17.8568 | 6.4568  | train | 0.8  | 0.9518 | 0.1518 | train | 21.31 | 21.863  | 0.553  |

**Table (S4):** Experimental and predicted PCE,  $V_{oc}$ , and  $J_{sc}$  values for the test and train sets for dopant free HTMs when used in PSCs devices utilizing 1D, and 2D descriptors.

| HTM                 | PCE   |         |          |         | $V_{oc}$ |         |          |        | $J_{sc}$ |         |          |        |
|---------------------|-------|---------|----------|---------|----------|---------|----------|--------|----------|---------|----------|--------|
|                     | Set   | Y (Obs) | Y (Pred) | Error   | Set      | Y (Obs) | Y (Pred) | Error  | Set      | Y (Obs) | Y (Pred) | Error  |
| <b>TAT-2T-CAN</b>   | train | 20.1    | 17.1375  | -2.9625 | test     | 1.13    | 1.0599   | 0.0701 | train    | 23.1    | 22.451   | -0.649 |
| <b>C-CPDT</b>       | train | 19.6    | 17.6714  | -1.9286 | train    | 1.14    | 1.0609   | 0.0791 | train    | 23.27   | 22.2353  | 1.0347 |
| <b>FBA3</b>         | train | 19.27   | 17.7561  | -1.5139 | train    | 1.09    | 1.0342   | 0.0558 | train    | 22.12   | 22.4364  | 0.3164 |
| <b>FBA2</b>         | train | 18.7    | 17.7305  | -0.9695 | train    | 1.06    | 1.0334   | 0.0266 | test     | 22.32   | 22.438   | 0.118  |
| <b>CJ-01</b>        | train | 18.56   | 18.0197  | -0.5403 | train    | 1.113   | 1.0604   | 0.0526 | train    | 22.32   | 22.3488  | 0.0288 |
| <b>TPA-BPFN-TPA</b> | train | 18.4    | 18.1565  | -0.2435 | train    | 1.04    | 1.0461   | 0.0061 | train    | 22.7    | 22.3728  | 0.3272 |
| <b>ACE-QA-ACE</b>   | train | 18.2    | 18.55    | 0.35    | train    | 1.06    | 1.065    | 0.005  | train    | 22.41   | 22.786   | 0.376  |
| <b>PCA-1</b>        | train | 18.17   | 16.3169  | -1.8531 | train    | 1.062   | 1.0138   | 0.0482 | test     | 22.3    | 22.2235  | 0.0765 |
| <b>IDF-SFXPh</b>    | train | 17.6    | 17.7639  | 0.1639  | train    | 1.05    | 1.0691   | 0.0191 | train    | 21.5    | 21.9826  | 0.4826 |
| <b>BTDT</b>         | train | 17.6    | 17.6993  | 0.0993  | train    | 0.97    | 1.0531   | 0.0831 | train    | 25.73   | 22.1415  | 3.5885 |
| <b>TPA-3T-DCV</b>   | train | 17.6    | 16.9618  | -0.6382 | test     | 1.08    | 1.0646   | 0.0154 | train    | 23      | 22.0851  | 0.9149 |
| <b>TAT-2T-DCV</b>   | test  | 17.6    | 16.3725  | -1.2276 | train    | 1.08    | 1.0515   | 0.0285 | test     | 23      | 22.359   | -0.641 |
| <b>TPA-ANT-TPA</b>  | test  | 17.5    | 18.8982  | 1.3982  | train    | 1.03    | 1.0744   | 0.0444 | train    | 21.07   | 22.2705  | 1.2005 |
| <b>BTPA-TCNE</b>    | train | 16.94   | 17.1599  | 0.2199  | train    | 1.04    | 1.0561   | 0.0161 | train    | 20.84   | 22.4661  | 1.6261 |
| <b>BTBDT</b>        | train | 16.9    | 17.1932  | 0.2932  | train    | 0.95    | 1.0551   | 0.1051 | train    | 24.68   | 22.1318  | 2.5482 |

|                          |       |       |         |         |       |       |        |        |        |       |        |         |        |
|--------------------------|-------|-------|---------|---------|-------|-------|--------|--------|--------|-------|--------|---------|--------|
| <b>FBA1</b>              | test  | 16.8  | 17.8444 | 1.0444  | test  | 1.05  | 1.0372 | -      | 0.0128 | train | 21.57  | 22.5089 | 0.9389 |
| <b>Z1011</b>             | train | 16.3  | 16.535  | 0.235   | train | 1.096 | 1.0504 | -      | 0.0456 | train | 20.52  | 21.8216 | 1.3016 |
| <b>Z34</b>               | test  | 16.1  | 18.2365 | 2.1365  | train | 1.055 | 1.0785 | 0.0235 |        | train | 21.245 | 22.2367 | 0.9917 |
| <b>CQ2</b>               | train | 15.2  | 17.2321 | 2.0321  | test  | 1.02  | 1.0286 | 0.0086 |        | test  | 20.57  | 22.4703 | 1.9003 |
| <b>DTBT</b>              | train | 11.6  | 16.9435 | 5.3435  | test  | 0.93  | 1.0327 | 0.1027 |        | test  | 22.2   | 22.4774 | 0.2774 |
| <b>DTBS</b>              | test  | 15    | 17.5549 | 2.5549  | train | 0.96  | 1.0344 | 0.0744 |        | train | 22.78  | 22.7024 | 0.0776 |
| <b>DOR3T-TBDT</b>        | train | 14.9  | 14.5923 | -0.3077 | test  | 0.97  | 1      | 0.03   |        | train | 20.7   | 21.5859 | 0.8859 |
| <b>X25</b>               | train | 14.4  | 17.6577 | 3.2577  | train | 1.01  | 1.0532 | 0.0432 |        | train | 19.64  | 22.6608 | 3.0208 |
| <b>HTM1</b>              | train | 13.4  | 17.2828 | 3.8828  | test  | 0.971 | 1.0622 | 0.0912 |        | test  | 19.3   | 21.7085 | 2.4085 |
| <b>DTBF</b>              | train | 13.3  | 16.9818 | 3.6818  | train | 0.95  | 1.0286 | 0.0786 |        | test  | 22.48  | 22.4696 | 0.0104 |
| <b>T-CPDT</b>            | train | 11.4  | 17.597  | 6.197   | train | 0.88  | 1.0671 | 0.1871 |        | train | 21.37  | 22.1928 | 0.8228 |
| <b>DFBT-MTP</b>          | train | 21.2  | 18.5914 | -2.6086 | train | 1.16  | 1.0655 | 0.0945 |        | train | 22.15  | 22.332  | 0.182  |
| <b>MPA-BTTI</b>          | train | 21.17 | 18.5272 | -2.6428 | train | 1.12  | 1.0718 | 0.0482 |        | train | 23.23  | 22.6115 | 0.6185 |
| <b>DBTMT</b>             | train | 21.1  | 18.9011 | -2.1989 | train | 1.12  | 1.0712 | 0.0488 |        | test  | 22.7   | 22.3642 | 0.3358 |
| <b>TPE-S</b>             | train | 21    | 18.796  | -2.204  | test  | 1.13  | 1.1018 | 0.0282 |        | train | 23.3   | 21.7812 | 1.5188 |
| <b>DFH</b>               | test  | 20.6  | 17.0013 | -3.5987 | train | 1.09  | 1.0327 | 0.0573 |        | train | 22.7   | 22.1126 | 0.5874 |
| <b>DBFMT</b>             | train | 20.5  | 17.6838 | -2.8162 | train | 1.07  | 1.0445 | 0.0255 |        | train | 23.7   | 22.4097 | 1.2903 |
| <b>DPh-DNTT</b>          | train | 20.1  | 17.6262 | -2.4738 | train | 1.1   | 1.0374 | 0.0626 |        | train | 22.56  | 22.1334 | 0.4266 |
| <b>BT-MTP</b>            | test  | 20.1  | 18.379  | -1.721  | train | 1.1   | 1.056  | -0.044 |        | train | 23.01  | 22.3071 | 0.7029 |
| <b>YJ01</b>              | train | 19.8  | 17.7207 | -2.0793 | train | 1.08  | 1.0338 | 0.0462 |        | train | 22.53  | 22.3303 | 0.1997 |
| <b>BDT-POZ</b>           | train | 19.16 | 19.8416 | 0.6816  | train | 1.04  | 1.0742 | 0.0342 |        | train | 22.56  | 23.1275 | 0.5675 |
| <b>FMT</b>               | train | 19.06 | 17.3159 | -1.7441 | train | 1.07  | 1.0423 | 0.0277 |        | train | 22.52  | 22.3433 | 0.1767 |
| <b>TAPC</b>              | train | 18.8  | 17.6908 | -1.1092 | test  | 1.04  | 1.039  | -0.001 |        | train | 22.32  | 22.4935 | 0.1735 |
| <b>XY1</b>               | train | 18.78 | 17.8952 | -0.8848 | train | 1.11  | 1.0745 | 0.0355 |        | train | 22.21  | 22.2458 | 0.0358 |
| <b>VB-MeO-FDPA</b>       | train | 18.7  | 17.0991 | -1.6009 | train | 1.15  | 1.0352 | 0.1148 |        | test  | 20.89  | 22.0328 | 1.1428 |
| <b>Trux-OMeTAD</b>       | train | 18.6  | 17.8776 | -0.7224 | train | 1.02  | 1.0925 | 0.0725 |        | train | 23.2   | 21.9398 | 1.2602 |
| <b>H2</b>                | test  | 18.6  | 18.1436 | -0.4564 | test  | 1.06  | 1.064  | 0.004  |        | train | 22.93  | 22.2744 | 0.6556 |
| <b>D106</b>              | test  | 18.2  | 18.2567 | 0.0567  | train | 1.05  | 1.0773 | 0.0273 |        | train | 22.32  | 22.4334 | 0.1134 |
| <b>m-MTDATA</b>          | train | 18.12 | 18.0106 | -0.1094 | train | 1.035 | 1.0822 | 0.0472 |        | train | 22.5   | 22.1813 | 0.3187 |
| <b>TPAC3M</b>            | train | 17.54 | 18.1955 | 0.6555  | train | 1     | 1.0551 | 0.0551 |        | train | 22.79  | 22.6244 | 0.1656 |
| <b>YJ02</b>              | train | 17.5  | 17.6868 | 0.1868  | train | 1.04  | 1.0337 | 0.0063 |        | train | 22.22  | 22.2685 | 0.0485 |
| <b>D105</b>              | train | 17.4  | 18.9369 | 1.5369  | test  | 1.04  | 1.0764 | 0.0364 |        | train | 21.96  | 22.5842 | 0.6242 |
| <b>TPA-2,7-FLTPA-TPA</b> | train | 17.1  | 17.4806 | 0.3806  | test  | 1.052 | 1.0637 | 0.0117 |        | train | 20.82  | 21.9077 | 1.0877 |
| <b>TTA</b>               | train | 16.7  | 18.0639 | 1.3639  | train | 1.04  | 1.079  | 0.039  |        | train | 20.4   | 21.8451 | 1.4451 |
| <b>TPP-SMeTAD</b>        | train | 16.6  | 18.9487 | 2.3486  | train | 1.07  | 1.1002 | 0.0302 |        | test  | 20.15  | 21.8979 | 1.7479 |
| <b>TPA-TVT-TPA</b>       | train | 16.32 | 17.7767 | 1.4566  | test  | 1.07  | 1.0334 | 0.0366 |        | train | 21.49  | 22.4506 | 0.9606 |

|                                                 |       |       |         |         |       |      |        |        |       |       |         |        |
|-------------------------------------------------|-------|-------|---------|---------|-------|------|--------|--------|-------|-------|---------|--------|
| <b>D104</b>                                     | train | 16.2  | 19.1411 | 2.9411  | train | 1.05 | 1.0696 | 0.0196 | test  | 21.22 | 22.5382 | 1.3182 |
| <b>CzPAF-TPA</b>                                | train | 15.71 | 16.5117 | 0.8017  | train | 1.05 | 1.05   | 0      | train | 20    | 21.9266 | 1.9266 |
| <b>TBDI</b>                                     | train | 15.33 | 17.6513 | 2.3213  | train | 1.09 | 1.0542 | 0.0358 | train | 19.3  | 22.5194 | 3.2194 |
| <b>H0</b>                                       | train | 13.3  | 17.3479 | 4.0479  | train | 1.02 | 1.039  | 0.019  | train | 22.87 | 22.195  | -0.675 |
| <b>YZ22</b>                                     | train | 22.4  | 18.4496 | -3.9504 | train | 1.1  | 1.0421 | 0.0579 | train | 25.1  | 22.4065 | 2.6935 |
| <b>SFDT-TMD</b>                                 | train | 21.7  | 17.4526 | -4.2474 | train | 1.13 | 1.0361 | 0.0939 | test  | 24.1  | 22.2121 | 1.8879 |
| <b>MeOTTVT</b>                                  | train | 21.3  | 18.1336 | -3.1664 | train | 1.11 | 1.0803 | 0.0297 | train | 23.89 | 22.1945 | 1.6955 |
| <b>DTP-C6Th</b>                                 | train | 21.04 | 17.319  | -3.721  | test  | 1.15 | 1.0384 | 0.1116 | test  | 22.76 | 22.425  | -0.335 |
| <b>TQ4</b>                                      | test  | 21    | 17.6145 | -3.3855 | train | 1.12 | 1.0401 | 0.0799 | train | 23.71 | 22.4464 | 1.2636 |
| <b>Cz-As</b>                                    | train | 20.9  | 17.8876 | -3.0124 | train | 1.08 | 1.0612 | 0.0188 | train | 24.4  | 22.6392 | 1.7608 |
| <b>DTPC13-ThTPA</b>                             | train | 20.38 | 17.0677 | -3.3123 | train | 1.13 | 1.0341 | 0.0959 | train | 22.82 | 22.4495 | 0.3705 |
| <b>TTE-2</b>                                    | test  | 20.04 | 17.9448 | -2.0952 | train | 1.11 | 1.0847 | 0.0253 | train | 23.26 | 21.9674 | 1.2926 |
| <b>ZT-H2</b>                                    | train | 19.6  | 16.7616 | -2.8384 | train | 1.11 | 1.0406 | 0.0694 | train | 24.15 | 22.0717 | 2.0783 |
| <b>CuPc</b>                                     | train | 19.6  | 18.1965 | -1.4035 | train | 1.1  | 1.0646 | 0.0354 | test  | 23.96 | 22.9242 | 1.0358 |
| <b>H2Pc</b>                                     | train | 19.6  | 16.9761 | -2.6239 | test  | 1.11 | 1.0313 | 0.0787 | train | 23.85 | 22.3335 | 1.5165 |
| <b>WH-1</b>                                     | test  | 19.5  | 17.5169 | -1.9831 | train | 1.08 | 1.0626 | 0.0174 | test  | 23.37 | 22.3435 | 1.0265 |
| <b>YN2</b>                                      | train | 19.27 | 17.8111 | -1.4589 | train | 1.11 | 1.0532 | 0.0568 | train | 22.87 | 22.4235 | 0.4465 |
| <b>WH-3</b>                                     | test  | 19.2  | 18.2081 | -0.9919 | train | 1.07 | 1.0834 | 0.0134 | train | 23.05 | 22.3787 | 0.6713 |
| <b>tpa-t-FBTD</b>                               | train | 18.9  | 17.7899 | -1.1101 | test  | 1.08 | 1.0411 | 0.0389 | train | 22.4  | 22.3396 | 0.0604 |
| <b>FA-CN</b>                                    | test  | 18.9  | 16.4085 | -2.4915 | train | 1.13 | 1.0755 | 0.0545 | train | 21.71 | 22.0371 | 0.3271 |
| <b>Y6-T</b>                                     | train | 18.8  | 16.7177 | -2.0823 | train | 1.1  | 1.0542 | 0.0458 | train | 22.9  | 21.9256 | 0.9744 |
| <b>Cz-Py</b>                                    | train | 18.2  | 17.4752 | -0.7248 | train | 1.13 | 1.0489 | 0.0811 | train | 21.9  | 22.5021 | 0.6021 |
| <b>YZ18</b>                                     | train | 18.1  | 17.9105 | -0.1895 | train | 1.03 | 1.0436 | 0.0136 | train | 24.1  | 22.4981 | 1.6019 |
| <b>C202</b>                                     | train | 17.7  | 17.5202 | -0.1798 | train | 1.05 | 1.0397 | 0.0103 | train | 23    | 22.3992 | 0.6008 |
| <b><math>\alpha,\beta</math>-COTh-Ph-OMeTAD</b> | train | 17.2  | 15.9327 | -1.2673 | train | 1.05 | 1.0304 | 0.0196 | test  | 21.51 | 21.2086 | 0.3014 |
| <b>C302</b>                                     | train | 16.4  | 16.7184 | 0.3184  | train | 1.01 | 1.0214 | 0.0114 | train | 23.3  | 22.438  | -0.862 |
| <b>PhCz-4MeOTPA</b>                             | train | 16    | 17.4921 | 1.4921  | train | 1.08 | 1.0651 | 0.0149 | train | 21.52 | 21.897  | 0.377  |
| <b>X62</b>                                      | train | 15.9  | 18.341  | 2.441   | train | 1.01 | 1.0838 | 0.0738 | train | 22.4  | 21.9618 | 0.4382 |
| <b>Spiro-IA</b>                                 | test  | 15.7  | 16.8373 | 1.1373  | train | 1.04 | 1.04   | 0      | train | 22.14 | 21.9853 | 0.1547 |
| <b>WH-2</b>                                     | train | 15.3  | 17.1257 | 1.8257  | train | 1.02 | 1.0328 | 0.0128 | train | 21.95 | 22.4056 | 0.4556 |
| <b>2 DBT(QT-TPA)2</b>                           | test  | 13.6  | 15.7395 | 2.1395  | train | 1.04 | 1.0235 | 0.0165 | train | 19.23 | 21.6352 | 2.4052 |
| <b>T(EDOT-TPA)2</b>                             | train | 12.3  | 16.5504 | 4.2504  | train | 1.04 | 1.0389 | 0.0011 | train | 20.25 | 22.3104 | 2.0604 |
| <b>TQ3</b>                                      | test  | 10.8  | 17.4851 | 6.6851  | train | 0.95 | 1.0375 | 0.0875 | train | 20.9  | 22.3048 | 1.4048 |
| <b>ZT-H1</b>                                    | train | 10    | 16.9987 | 6.9987  | train | 1    | 1.0477 | 0.0477 | train | 21.21 | 21.9879 | 0.7779 |
| <b>DT-BT</b>                                    | train | 7.3   | 17.7805 | 10.4805 | train | 0.83 | 1.0405 | 0.2105 | train | 16.8  | 22.2657 | 5.4657 |
| <b>C301</b>                                     | train | 5.8   | 15.9461 | 10.1461 | train | 0.73 | 0.9941 | 0.2641 | train | 19.6  | 22.3158 | 2.7158 |

|                   |       |      |         |         |       |      |        |   |        |       |       |         |   |        |
|-------------------|-------|------|---------|---------|-------|------|--------|---|--------|-------|-------|---------|---|--------|
| <b>TPADPP</b>     | train | 21.6 | 17.6122 | -3.9878 | train | 1.12 | 1.0274 | - | 0.0926 | train | 23.72 | 22.2176 | - | 1.5024 |
| <b>MCz-cz-BTI</b> | test  | 21.3 | 18.364  | -2.936  | train | 1.1  | 1.0675 | - | 0.0325 | test  | 23.24 | 21.8874 | - | 1.3526 |
| <b>BTORCNA</b>    | test  | 21.1 | 17.904  | -3.196  | test  | 1.1  | 1.0498 | - | 0.0502 | train | 22.84 | 22.3934 | - | 0.4466 |
| <b>MPA-CZ-PTI</b> | train | 20.8 | 17.8141 | -2.9859 | train | 1.07 | 1.0688 | - | 0.0012 | test  | 22.84 | 21.8892 | - | 0.9508 |
| <b>HTM-F</b>      | train | 20.5 | 18.4842 | -2.0158 | test  | 1.09 | 1.0789 | - | 0.0111 | test  | 23.03 | 22.117  | - | -0.913 |
| <b>N01</b>        | train | 20.4 | 19.8506 | -0.5494 | train | 1.08 | 1.08   | - | 0      | train | 23.65 | 22.968  | - | -0.682 |
| <b>BTF6</b>       | train | 20.3 | 17.577  | -2.723  | train | 1.13 | 1.0237 | - | 0.1063 | train | 22.23 | 22.1741 | - | 0.0559 |
| <b>TPA-FO</b>     | train | 20.2 | 18.4615 | -1.7385 | train | 1.09 | 1.0599 | - | 0.0301 | train | 22.76 | 22.4086 | - | 0.3514 |
| <b>BTORA</b>      | train | 20.2 | 18.1843 | -2.0157 | test  | 1.09 | 1.0561 | - | 0.0339 | train | 22.1  | 22.3721 | - | 0.2721 |
| <b>MCZ-PA-PTI</b> | train | 20   | 17.0197 | -2.9803 | train | 1.08 | 1.0481 | - | 0.0319 | train | 22.66 | 21.7324 | - | 0.9276 |
| <b>HTM-H</b>      | train | 19   | 17.9403 | -1.0597 | train | 1.05 | 1.0554 | - | 0.0054 | train | 22.7  | 22.4671 | - | 0.2329 |
| <b>N02</b>        | train | 18.9 | 17.2033 | -1.6967 | train | 1.03 | 1.0429 | - | 0.0129 | train | 23.48 | 22.5658 | - | 0.9142 |
| <b>BTRA</b>       | train | 18.4 | 18.2132 | -0.1868 | train | 1.06 | 1.0544 | - | 0.0056 | test  | 21.64 | 22.2491 | - | 0.6091 |
| <b>MPA-PA-BTI</b> | test  | 17.4 | 17.5194 | 0.1194  | train | 0.99 | 1.0709 | - | 0.0809 | train | 22.15 | 21.7663 | - | 0.3837 |
| <b>TPA-PDO</b>    | train | 17   | 18.1393 | 1.1393  | train | 1.03 | 1.0474 | - | 0.0174 | train | 20.44 | 22.1957 | - | 1.7557 |
| <b>TPADPP-Boc</b> | train | 16.3 | 17.8918 | 1.5918  | test  | 1.02 | 1.0586 | - | 0.0386 | train | 22.22 | 21.9474 | - | 0.2726 |
| <b>BTF5</b>       | train | 11.4 | 17.617  | 6.217   | train | 0.8  | 1.0267 | - | 0.2267 | train | 21.31 | 22.3011 | - | 0.9911 |

**Table (S5):** Experimental and predicted PCE,  $V_{OC}$ , and  $J_{SC}$  values for the test and train sets for dopant free HTMs when used in PSCs devices utilizing 1D, 2D, and 3D descriptors.

| HTM                 | PCE   |         |          |         | $V_{oc}$ |         |          |       | $J_{sc}$ |         |         |         |   |        |
|---------------------|-------|---------|----------|---------|----------|---------|----------|-------|----------|---------|---------|---------|---|--------|
|                     | Set   | Y (Obs) | Y (Pred) | Error   | Set      | Y (Obs) | Y (Pred) | Error | Set      | Y (Obs) | Y(Pred) | Error   |   |        |
| <b>TAT-2T-CAN</b>   | train | 20.1    | 17.84    | -2.26   | train    | 1.13    | 1.0906   | -     | 0.0394   | test    | 23.1    | 23.0939 | - | 0.0061 |
| <b>C-CPDT</b>       | test  | 19.6    | 16.8522  | -2.7478 | train    | 1.14    | 1.0257   | -     | 0.1143   | train   | 23.27   | 22.7791 | - | 0.4909 |
| <b>FBA3</b>         | train | 19.27   | 16.2876  | -2.9824 | train    | 1.09    | 1.1081   | -     | 0.0181   | train   | 22.12   | 21.2395 | - | 0.8805 |
| <b>FBA2</b>         | test  | 18.7    | 17.0017  | -1.6983 | train    | 1.06    | 1.0267   | -     | 0.0333   | train   | 22.32   | 21.9678 | - | 0.3522 |
| <b>CJ-01</b>        | train | 18.56   | 18.2303  | -0.3297 | train    | 1.113   | 1.0398   | -     | 0.0732   | train   | 22.32   | 22.3567 | - | 0.0367 |
| <b>TPA-BPFN-TPA</b> | train | 18.4    | 19.6392  | 1.2392  | train    | 1.04    | 1.0362   | -     | 0.0038   | train   | 22.7    | 22.5361 | - | 0.1639 |
| <b>ACE-QA-ACE</b>   | train | 18.2    | 19.6709  | 1.4709  | train    | 1.06    | 1.0511   | -     | 0.0089   | train   | 22.41   | 22.6626 | - | 0.2526 |
| <b>PCA-1</b>        | train | 18.17   | 17.5958  | -0.5742 | test     | 1.062   | 1.0604   | -     | 0.0016   | test    | 22.3    | 22.5506 | - | 0.2506 |
| <b>IDF-SFXPh</b>    | test  | 17.6    | 19.1629  | 1.5629  | test     | 1.05    | 1.0661   | -     | 0.0161   | test    | 21.5    | 21.9021 | - | 0.4021 |
| <b>BTDTTP</b>       | train | 17.6    | 17.7441  | 0.1441  | train    | 0.97    | 0.9962   | -     | 0.0262   | train   | 25.73   | 24.6318 | - | 1.0982 |
| <b>TPA-3T-DCV</b>   | train | 17.6    | 17.7851  | 0.1851  | test     | 1.08    | 1.1032   | -     | 0.0232   | test    | 23      | 21.5881 | - | 1.4119 |
| <b>TAT-2T-DCV</b>   | train | 17.6    | 18.0968  | 0.4968  | train    | 1.08    | 1.1306   | -     | 0.0506   | train   | 23      | 22.7651 | - | 0.2349 |
| <b>TPA-ANT-TPA</b>  | train | 17.5    | 18.1405  | 0.6405  | test     | 1.03    | 1.0329   | -     | 0.0029   | train   | 21.07   | 21.7607 | - | 0.6907 |
| <b>BTPA-TCNE</b>    | train | 16.94   | 18.7225  | 1.7825  | test     | 1.04    | 1.0577   | -     | 0.0177   | train   | 20.84   | 20.9597 | - | 0.1197 |
| <b>BTBDT</b>        | train | 16.9    | 17.0065  | 0.1065  | train    | 0.95    | 0.9754   | -     | 0.0254   | test    | 24.68   | 24.2187 | - | 0.4613 |

|                          |       |       |         |         |       |       |        |        |       |        |         |        |
|--------------------------|-------|-------|---------|---------|-------|-------|--------|--------|-------|--------|---------|--------|
| <b>FBA1</b>              | test  | 16.8  | 16.9029 | 0.1029  | train | 1.05  | 0.9917 | -      | train | 21.57  | 22.1483 | 0.5783 |
| <b>Z1011</b>             | train | 16.3  | 16.9973 | 0.6973  | train | 1.096 | 1.0982 | 0.0022 | test  | 20.52  | 21.3442 | 0.8242 |
| <b>Z34</b>               | train | 16.1  | 18.5076 | 2.4076  | train | 1.055 | 1.0788 | 0.0238 | train | 21.245 | 21.8593 | 0.6143 |
| <b>CQ2</b>               | train | 15.2  | 16.9299 | 1.7299  | train | 1.02  | 1.0118 | 0.0082 | train | 20.57  | 22.3333 | 1.7633 |
| <b>DTBT</b>              | train | 11.6  | 16.1575 | 4.5575  | train | 0.93  | 1.0035 | 0.0735 | test  | 22.2   | 22.7782 | 0.5782 |
| <b>DTBS</b>              | train | 15    | 14.6568 | -0.3432 | train | 0.96  | 0.9236 | 0.0364 | train | 22.78  | 22.5593 | 0.2207 |
| <b>DOR3T-TBDT</b>        | train | 14.9  | 13.8247 | -1.0753 | train | 0.97  | 0.981  | 0.011  | train | 20.7   | 21.1269 | 0.4269 |
| <b>X25</b>               | train | 14.4  | 18.317  | 3.917   | train | 1.01  | 1.0401 | 0.0301 | train | 19.64  | 22.4282 | 2.7882 |
| <b>HTM1</b>              | train | 13.4  | 17.0789 | 3.6789  | train | 0.971 | 1.027  | 0.056  | train | 19.3   | 21.1826 | 1.8826 |
| <b>DTBF</b>              | test  | 13.3  | 15.8082 | 2.5082  | test  | 0.95  | 0.9987 | 0.0487 | train | 22.48  | 22.7469 | 0.2669 |
| <b>T-CPDT</b>            | train | 11.4  | 16.3525 | 4.9525  | train | 0.88  | 0.9781 | 0.0981 | train | 21.37  | 22.1823 | 0.8123 |
| <b>DFBT-MTP</b>          | test  | 21.2  | 20.8781 | -0.3219 | test  | 1.16  | 1.1371 | 0.0229 | train | 22.15  | 22.461  | 0.311  |
| <b>MPA-BTTI</b>          | train | 21.17 | 20.153  | -1.017  | train | 1.12  | 1.088  | -0.032 | train | 23.23  | 23.4341 | 0.2041 |
| <b>DBTMT</b>             | test  | 21.1  | 20.7475 | -0.3525 | train | 1.12  | 1.1335 | 0.0135 | train | 22.7   | 22.8052 | 0.1052 |
| <b>TPE-S</b>             | train | 21    | 20.0411 | -0.9589 | train | 1.13  | 1.1082 | 0.0218 | train | 23.3   | 22.102  | -1.198 |
| <b>DFH</b>               | train | 20.6  | 19.9806 | -0.6194 | train | 1.09  | 1.062  | -0.028 | test  | 22.7   | 22.6565 | 0.0435 |
| <b>DBFMT</b>             | test  | 20.5  | 20.6025 | 0.1025  | train | 1.07  | 1.1063 | 0.0363 | test  | 23.7   | 22.9859 | 0.7141 |
| <b>DPh-DNTT</b>          | train | 20.1  | 16.8759 | -3.2241 | train | 1.1   | 1.0992 | 0.0008 | train | 22.56  | 21.4517 | 1.1083 |
| <b>BT-MTP</b>            | train | 20.1  | 21.1408 | 1.0408  | train | 1.1   | 1.1487 | 0.0487 | train | 23.01  | 23.0245 | 0.0145 |
| <b>YJ01</b>              | train | 19.8  | 19.2941 | -0.5059 | train | 1.08  | 1.0527 | 0.0273 | train | 22.53  | 22.7807 | 0.2507 |
| <b>BDT-POZ</b>           | test  | 19.16 | 18.3455 | -0.8145 | train | 1.04  | 1.0873 | 0.0473 | train | 22.56  | 23.0142 | 0.4542 |
| <b>FMT</b>               | train | 19.06 | 19.2852 | 0.2252  | test  | 1.07  | 1.0784 | 0.0084 | train | 22.52  | 22.2822 | 0.2378 |
| <b>TAPC</b>              | train | 18.8  | 17.7656 | -1.0344 | train | 1.04  | 0.9903 | 0.0497 | test  | 22.32  | 21.6567 | 0.6633 |
| <b>XY1</b>               | train | 18.78 | 17.1123 | -1.6677 | train | 1.11  | 1.0527 | 0.0573 | train | 22.21  | 22.0633 | 0.1467 |
| <b>VB-MeO-FDPA</b>       | train | 18.7  | 18.6936 | -0.0064 | train | 1.15  | 1.0998 | 0.0502 | train | 20.89  | 21.3757 | 0.4856 |
| <b>Trux-OMeTAD</b>       | train | 18.6  | 17.7108 | -0.8892 | train | 1.02  | 0.9976 | 0.0224 | train | 23.2   | 21.1991 | 2.0009 |
| <b>H2</b>                | train | 18.6  | 18.8642 | 0.2642  | train | 1.06  | 1.0724 | 0.0124 | train | 22.93  | 23.8454 | 0.9154 |
| <b>D106</b>              | train | 18.2  | 18.8329 | 0.6329  | train | 1.05  | 1.0653 | 0.0153 | train | 22.32  | 22.5453 | 0.2253 |
| <b>m-MTDATA</b>          | train | 18.12 | 17.7107 | -0.4093 | train | 1.035 | 1.0103 | 0.0247 | test  | 22.5   | 21.273  | -1.227 |
| <b>TPAC3M</b>            | train | 17.54 | 17.5643 | 0.0243  | train | 1     | 1.0002 | 0.0002 | train | 22.79  | 22.0835 | 0.7065 |
| <b>YJ02</b>              | train | 17.5  | 18.8842 | 1.3842  | train | 1.04  | 1.041  | 0.001  | train | 22.22  | 22.5006 | 0.2806 |
| <b>D105</b>              | train | 17.4  | 17.5097 | 0.1097  | train | 1.04  | 1.0268 | 0.0132 | test  | 21.96  | 22.2199 | 0.2599 |
| <b>TPA-2,7-FLTPA-TPA</b> | train | 17.1  | 16.8735 | -0.2265 | test  | 1.052 | 1.0036 | 0.0484 | train | 20.82  | 20.818  | -0.002 |
| <b>TTA</b>               | test  | 16.7  | 17.5398 | 0.8398  | test  | 1.04  | 1.0123 | 0.0277 | train | 20.4   | 19.2233 | 1.1767 |
| <b>TPP-SMeTAD</b>        | train | 16.6  | 19.7407 | 3.1407  | train | 1.07  | 1.0987 | 0.0287 | train | 20.15  | 21.9147 | 1.7647 |
| <b>TPA-TVT-TPA</b>       | train | 16.32 | 17.3811 | 1.0611  | train | 1.07  | 1.0598 | 0.0102 | train | 21.49  | 22.6621 | 1.1721 |
| <b>D104</b>              | train | 16.2  | 17.0321 | 0.8321  | train | 1.05  | 1.0483 | 0.0017 | train | 21.22  | 21.6989 | 0.4789 |

|                                                 |       |       |         |         |       |      |        |   |        |       |       |         |        |
|-------------------------------------------------|-------|-------|---------|---------|-------|------|--------|---|--------|-------|-------|---------|--------|
| <b>CzPAF-TPA</b>                                | train | 15.71 | 16.8641 | 1.1541  | train | 1.05 | 1.0021 | - | 0.0479 | train | 20    | 21.2896 | 1.2896 |
| <b>TBDI</b>                                     | test  | 15.33 | 14.4938 | -0.8362 | test  | 1.09 | 1.0224 | - | 0.0676 | train | 19.3  | 19.9342 | 0.6342 |
| <b>H0</b>                                       | train | 13.3  | 15.8171 | 2.5171  | train | 1.02 | 1.0311 | - | 0.0111 | test  | 22.87 | 22.3919 | 0.4781 |
| <b>YZ22</b>                                     | train | 22.4  | 18.7046 | -3.6954 | train | 1.1  | 1.0217 | - | 0.0783 | train | 25.1  | 22.9565 | 2.1436 |
| <b>SFDT-TMD</b>                                 | train | 21.7  | 19.7081 | -1.9919 | test  | 1.13 | 1.067  | - | -0.063 | train | 24.1  | 22.6648 | 1.4352 |
| <b>MeOTTVT</b>                                  | train | 21.3  | 18.6244 | -2.6756 | test  | 1.11 | 1.0751 | - | 0.0349 | train | 23.89 | 22.0576 | 1.8324 |
| <b>DTP-C6Th</b>                                 | train | 21.04 | 18.5835 | -2.4565 | train | 1.15 | 1.1334 | - | 0.0166 | train | 22.76 | 22.7184 | 0.0416 |
| <b>TQ4</b>                                      | train | 21    | 17.2372 | -3.7628 | test  | 1.12 | 1.0414 | - | 0.0786 | train | 23.71 | 23.246  | -0.464 |
| <b>Cz-As</b>                                    | train | 20.9  | 20.439  | -0.461  | train | 1.08 | 1.1015 | - | 0.0215 | train | 24.4  | 23.4136 | 0.9864 |
| <b>DTPC13-ThTPA</b>                             | train | 20.38 | 16.453  | -3.927  | train | 1.13 | 1.0815 | - | 0.0485 | test  | 22.82 | 22.6403 | 0.1797 |
| <b>TTE-2</b>                                    | train | 20.04 | 18.0391 | -2.0009 | train | 1.11 | 1.086  | - | -0.024 | train | 23.26 | 21.8396 | 1.4204 |
| <b>ZT-H2</b>                                    | train | 19.6  | 15.7737 | -3.8263 | train | 1.11 | 1.064  | - | -0.046 | train | 24.15 | 22.0849 | 2.0651 |
| <b>CuPc</b>                                     | train | 19.6  | 18.8531 | -0.7469 | test  | 1.1  | 1.0534 | - | 0.0466 | test  | 23.96 | 21.9531 | 2.0069 |
| <b>H2Pc</b>                                     | train | 19.6  | 17.3315 | -2.2685 | train | 1.11 | 1.121  | - | 0.011  | train | 23.85 | 22.8528 | 0.9972 |
| <b>WH-1</b>                                     | train | 19.5  | 19.5309 | 0.0309  | train | 1.08 | 1.0645 | - | 0.0155 | train | 23.37 | 22.6754 | 0.6946 |
| <b>YN2</b>                                      | train | 19.27 | 17.4021 | -1.8679 | test  | 1.11 | 1.0732 | - | 0.0368 | train | 22.87 | 22.6806 | 0.1894 |
| <b>WH-3</b>                                     | train | 19.2  | 16.6713 | -2.5287 | train | 1.07 | 1.0864 | - | 0.0164 | train | 23.05 | 21.8803 | 1.1697 |
| <b>tpa-t-FBTD</b>                               | train | 18.9  | 16.9567 | -1.9433 | train | 1.08 | 1.0266 | - | 0.0534 | train | 22.4  | 23.1308 | 0.7308 |
| <b>FA-CN</b>                                    | test  | 18.9  | 19.5876 | 0.6876  | train | 1.13 | 1.1532 | - | 0.0232 | train | 21.71 | 21.53   | -0.18  |
| <b>Y6-T</b>                                     | train | 18.8  | 15.5075 | -3.2925 | train | 1.1  | 1.0928 | - | 0.0072 | train | 22.9  | 22.5403 | 0.3597 |
| <b>Cz-Py</b>                                    | test  | 18.2  | 20.0116 | 1.8116  | train | 1.13 | 1.1057 | - | 0.0243 | train | 21.9  | 23.2543 | 1.3543 |
| <b>YZ18</b>                                     | test  | 18.1  | 18.5403 | 0.4403  | train | 1.03 | 1.0352 | - | 0.0052 | train | 24.1  | 22.4507 | 1.6493 |
| <b>C202</b>                                     | train | 17.7  | 17.6356 | -0.0644 | train | 1.05 | 1.0291 | - | 0.0209 | train | 23    | 22.9556 | 0.0444 |
| <b><math>\alpha,\beta</math>-COTh-Ph-OMeTAD</b> | test  | 17.2  | 16.8012 | -0.3988 | train | 1.05 | 1.0188 | - | 0.0312 | train | 21.51 | 20.8186 | 0.6914 |
| <b>C302</b>                                     | train | 16.4  | 12.2762 | -4.1238 | train | 1.01 | 0.9072 | - | 0.1028 | test  | 23.3  | 21.9854 | 1.3146 |
| <b>PhCz-4MeOTPA</b>                             | train | 16    | 15.4824 | -0.5176 | test  | 1.08 | 1.0029 | - | 0.0771 | train | 21.52 | 20.7869 | 0.7331 |
| <b>X62</b>                                      | test  | 15.9  | 18.6638 | 2.7638  | test  | 1.01 | 1.0405 | - | 0.0305 | train | 22.4  | 21.5913 | 0.8087 |
| <b>Spiro-IA</b>                                 | train | 15.7  | 14.3834 | -1.3166 | train | 1.04 | 1.0452 | - | 0.0052 | train | 22.14 | 21.5059 | 0.6341 |
| <b>WH-2</b>                                     | train | 15.3  | 14.9147 | -0.3853 | train | 1.02 | 1.0417 | - | 0.0217 | train | 21.95 | 21.411  | -0.539 |
| <b>2 DBT(QT-TPA)2</b>                           | test  | 13.6  | 14.2028 | 0.6028  | train | 1.04 | 1.0427 | - | 0.0027 | train | 19.23 | 20.3705 | 1.1405 |
| <b>T(EDOT-TPA)2</b>                             | train | 12.3  | 12.3241 | 0.0241  | train | 1.04 | 1.0745 | - | 0.0345 | test  | 20.25 | 22.0697 | 1.8197 |
| <b>TQ3</b>                                      | train | 10.8  | 16.2291 | 5.4291  | test  | 0.95 | 1.0282 | - | 0.0782 | test  | 20.9  | 22.6321 | 1.7321 |
| <b>ZT-H1</b>                                    | test  | 10    | 15.1285 | 5.1285  | train | 1    | 1.041  | - | 0.041  | train | 21.21 | 21.3622 | 0.1522 |
| <b>DT-BT</b>                                    | train | 7.3   | 15.6395 | 8.3395  | train | 0.83 | 0.9495 | - | 0.1195 | train | 16.8  | 21.7515 | 4.9515 |
| <b>C301</b>                                     | train | 5.8   | 11.3253 | 5.5253  | train | 0.73 | 0.8739 | - | 0.1439 | test  | 19.6  | 21.6795 | 2.0795 |

|                   |       |      |         |         |       |      |        |        |        |       |         |         |        |        |  |
|-------------------|-------|------|---------|---------|-------|------|--------|--------|--------|-------|---------|---------|--------|--------|--|
| <b>TPADPP</b>     | train | 21.6 | 19.2428 | -2.3572 | train | 1.12 | 1.0805 | -      | 0.0395 | train | 23.72   | 23.3672 | -      | 0.3528 |  |
| <b>MCz-cz-BTI</b> | train | 21.3 | 20.9113 | -0.3887 | train | 1.1  | 1.1098 | 0.0098 | train  | 23.24 | 23.5737 | 0.3337  |        |        |  |
| <b>BTORCNA</b>    | train | 21.1 | 19.3324 | -1.7676 | train | 1.1  | 1.1142 | 0.0142 | train  | 22.84 | 23.0195 | 0.1795  |        |        |  |
| <b>MPA-CZ-PTI</b> | train | 20.8 | 20.5569 | -0.2431 | train | 1.07 | 1.0919 | 0.0219 | train  | 22.84 | 22.8074 | 0.0326  | -      |        |  |
| <b>HTM-F</b>      | train | 20.5 | 22.9984 | 2.4984  | train | 1.09 | 1.1257 | 0.0357 | train  | 23.03 | 22.9764 | 0.0536  | -      |        |  |
| <b>N01</b>        | train | 20.4 | 18.9502 | -1.4498 | train | 1.08 | 1.0951 | 0.0151 | train  | 23.65 | 23.4081 | 0.2419  | -      |        |  |
| <b>BTF6</b>       | train | 20.3 | 16.8816 | -3.4184 | train | 1.13 | 1.0508 | -      | 0.0792 | train | 22.23   | 21.2343 | 0.9957 | -      |  |
| <b>TPA-FO</b>     | train | 20.2 | 19.6323 | -0.5677 | train | 1.09 | 1.0249 | 0.0651 | train  | 22.76 | 22.2937 | 0.4663  | -      |        |  |
| <b>BTORA</b>      | test  | 20.2 | 18.7721 | -1.4279 | train | 1.09 | 1.1238 | 0.0338 | train  | 22.1  | 22.6237 | 0.5237  | -      |        |  |
| <b>MCZ-PA-PTI</b> | test  | 20   | 20.306  | 0.306   | train | 1.08 | 1.0973 | 0.0173 | train  | 22.66 | 23.2832 | 0.6232  | -      |        |  |
| <b>HTM-H</b>      | train | 19   | 19.4982 | 0.4982  | train | 1.05 | 1.1178 | 0.0678 | train  | 22.7  | 22.5816 | 0.1184  | -      |        |  |
| <b>N02</b>        | train | 18.9 | 17.6962 | -1.2037 | train | 1.03 | 1.0497 | 0.0197 | train  | 23.48 | 23.2862 | 0.1938  | -      |        |  |
| <b>BTRA</b>       | train | 18.4 | 17.7665 | -0.6335 | train | 1.06 | 1.0704 | 0.0104 | test   | 21.64 | 21.8248 | 0.1848  | -      |        |  |
| <b>MPA-PA-BTI</b> | train | 17.4 | 19.4976 | 2.0976  | test  | 0.99 | 1.0434 | 0.0534 | train  | 22.15 | 22.1412 | 0.0088  | -      |        |  |
| <b>TPA-PDO</b>    | train | 17   | 19.4742 | 2.4742  | train | 1.03 | 1.003  | -0.027 | train  | 20.44 | 22.2352 | 1.7952  | -      |        |  |
| <b>TPADPP-Boc</b> | train | 16.3 | 16.6315 | 0.3315  | train | 1.02 | 0.9765 | -      | 0.0435 | train | 22.22   | 22.5766 | 0.3566 | -      |  |
| <b>BTF5</b>       | train | 11.4 | 17.7647 | 6.3647  | train | 0.8  | 0.9651 | 0.1651 | train  | 21.31 | 21.9117 | 0.6017  | -      |        |  |

**Table (S6):** Experimental and predicted PCE,  $V_{OC}$ , and  $J_{SC}$  values for the test and train sets for dopant free HTMs when used in PSCs devices utilizing 2D binary fingerprints descriptors.

| HTM                 | PCE   |         |          |         | $V_{oc}$ |         |          |        | $J_{sc}$ |         |          |         |
|---------------------|-------|---------|----------|---------|----------|---------|----------|--------|----------|---------|----------|---------|
|                     | Set   | Y (Obs) | Y (Pred) | Error   | Set      | Y (Obs) | Y (Pred) | Error  | Set      | Y (Obs) | Y (Pred) | Error   |
| <b>TAT-2T-CAN</b>   | train | 20.1    | 17.7501  | -2.3499 | train    | 1.13    | 1.1525   | 0.0225 | test     | 23.1    | 22.1477  | -0.9523 |
| <b>C-CPDT</b>       | train | 19.6    | 16.7381  | -2.8619 | train    | 1.14    | 1.0685   | 0.0715 | train    | 23.27   | 22.5107  | -0.7593 |
| <b>FBA3</b>         | train | 19.27   | 18.1646  | -1.1054 | train    | 1.09    | 1.1613   | 0.0713 | train    | 22.12   | 21.7637  | -0.3563 |
| <b>FBA2</b>         | test  | 18.7    | 17.9406  | -0.7594 | test     | 1.06    | 1.087    | 0.027  | train    | 22.32   | 21.8508  | -0.4692 |
| <b>CJ-01</b>        | train | 18.56   | 18.9603  | 0.4003  | train    | 1.113   | 1.0634   | 0.0496 | train    | 22.32   | 22.1532  | -0.1668 |
| <b>TPA-BPFN-TPA</b> | train | 18.4    | 19.3235  | 0.9235  | train    | 1.04    | 1.0254   | 0.0146 | train    | 22.7    | 22.1005  | -0.5995 |
| <b>ACE-QA-ACE</b>   | test  | 18.2    | 17.2422  | -0.9578 | train    | 1.06    | 1.0728   | 0.0128 | train    | 22.41   | 22.1937  | -0.2163 |
| <b>PCA-1</b>        | train | 18.17   | 17.7415  | -0.4285 | test     | 1.062   | 1.0441   | 0.0179 | test     | 22.3    | 22.8069  | 0.5069  |
| <b>IDF-SFXPh</b>    | train | 17.6    | 16.729   | -0.871  | test     | 1.05    | 1.0151   | 0.0349 | test     | 21.5    | 22.2906  | 0.7906  |
| <b>BTDTTP</b>       | train | 17.6    | 16.001   | -1.598  | train    | 0.97    | 0.954    | 0.0151 | train    | 25.73   | 25.1494  | -0.5806 |
| <b>TPA-3T-DCV</b>   | train | 17.6    | 17.553   | -0.046  | train    | 1.08    | 1.058    | -0.021 | test     | 23      | 22.4031  | -0.5969 |
| <b>TAT-2T-DCV</b>   | train | 17.6    | 16.783   | -0.817  | train    | 1.08    | 1.096    | 0.0164 | train    | 23      | 22.2397  | -0.7603 |
| <b>TPA-ANT-TPA</b>  | train | 17.5    | 16.139   | -1.36   | train    | 1.03    | 1.011    | 0.0181 | train    | 21.07   | 21.9372  | 0.8672  |
| <b>BTPA-TCNE</b>    | train | 16.94   | 19.043   | 2.1034  | train    | 1.04    | 1.021    | 0.0184 | train    | 20.84   | 21.5164  | 0.6764  |
| <b>BTBDT</b>        | test  | 16.9    | 15.9625  | -0.9375 | train    | 0.95    | 0.952    | 0.0026 | test     | 24.68   | 24.2794  | -0.4006 |



|                          |       |       |         |         |       |       |        |        |       |        |         |         |
|--------------------------|-------|-------|---------|---------|-------|-------|--------|--------|-------|--------|---------|---------|
| <b>FBA1</b>              | train | 16.8  | 15.526  | -1.273  | train | 1.05  | 1.019  | -0.031 | train | 21.57  | 21.3169 | -0.2531 |
| <b>Z1011</b>             | train | 16.3  | 18.066  | 1.7668  | train | 1.096 | 1.08   | 0.0155 | test  | 20.52  | 21.9734 | 1.4534  |
| <b>Z34</b>               | train | 16.1  | 19.191  | 3.0912  | train | 1.055 | 1.079  | 0.0241 | train | 21.245 | 22.305  | 1.06    |
| <b>CQ2</b>               | train | 15.2  | 15.887  | 0.6877  | test  | 1.02  | 1.034  | 0.014  | train | 20.57  | 20.6785 | 0.1085  |
| <b>DTBT</b>              | train | 11.6  | 13.395  | 1.795   | test  | 0.93  | 0.9741 | 0.0441 | test  | 22.2   | 23.1951 | 0.9951  |
| <b>DTBS</b>              | test  | 15    | 13.6621 | -1.3379 | train | 0.96  | 0.974  | 0.0141 | train | 22.78  | 23.1951 | 0.4151  |
| <b>DOR3T-TBDT</b>        | train | 14.9  | 14.009  | -0.89   | train | 0.97  | 0.972  | 0.0024 | train | 20.7   | 21.0294 | 0.3294  |
| <b>X25</b>               | train | 14.4  | 16.24   | 1.8409  | train | 1.01  | 1.022  | 0.0127 | train | 19.64  | 21.1655 | 1.5255  |
| <b>HTM1</b>              | train | 13.4  | 15.483  | 2.0836  | train | 0.971 | 0.959  | 0.0112 | train | 19.3   | 21.4956 | 2.1956  |
| <b>DTBF</b>              | test  | 13.3  | 13.7587 | 0.4587  | test  | 0.95  | 0.9741 | 0.0241 | train | 22.48  | 22.9777 | 0.4977  |
| <b>T-CPDT</b>            | train | 11.4  | 13.941  | 2.5415  | train | 0.88  | 0.972  | 0.0929 | train | 21.37  | 21.8431 | 0.4731  |
| <b>DFBT-MTP</b>          | train | 21.2  | 21.054  | -0.146  | test  | 1.16  | 1.1541 | 0.0059 | train | 22.15  | 22.4525 | 0.3025  |
| <b>MPA-BTTI</b>          | train | 21.17 | 19.128  | -2.041  | train | 1.12  | 1.129  | 0.009  | train | 23.23  | 23.3764 | 0.1464  |
| <b>DBTMT</b>             | train | 21.1  | 21.259  | 0.1596  | test  | 1.12  | 1.067  | -0.053 | train | 22.7   | 22.2614 | -0.4386 |
| <b>TPE-S</b>             | train | 21    | 20.565  | -0.434  | test  | 1.13  | 1.0712 | 0.0588 | train | 23.3   | 22.1563 | -1.1437 |
| <b>DFH</b>               | test  | 20.6  | 20.8659 | 0.2659  | train | 1.09  | 1.091  | 0.001  | test  | 22.7   | 22.3998 | -0.3002 |
| <b>DBFMT</b>             | train | 20.5  | 21.916  | 1.416   | train | 1.07  | 1.067  | -0.003 | test  | 23.7   | 22.6189 | -1.0811 |
| <b>DPh-DNTT</b>          | test  | 20.1  | 17.3029 | -2.7971 | train | 1.1   | 1.089  | 0.0103 | train | 22.56  | 22.6285 | 0.0685  |
| <b>BT-MTP</b>            | train | 20.1  | 20.832  | 0.7327  | train | 1.1   | 1.104  | 0.0046 | train | 23.01  | 22.4773 | -0.5327 |
| <b>YJ01</b>              | train | 19.8  | 19.323  | -0.477  | train | 1.08  | 1.066  | 0.0134 | train | 22.53  | 22.0949 | -0.4352 |
| <b>BDT-POZ</b>           | train | 19.16 | 18.364  | -0.795  | train | 1.04  | 1.084  | 0.0442 | train | 22.56  | 23.8507 | 1.2907  |
| <b>FMT</b>               | train | 19.06 | 21.156  | 2.0967  | train | 1.07  | 1.074  | 0.0047 | train | 22.52  | 22.493  | -0.027  |
| <b>TAPC</b>              | test  | 18.8  | 20.4525 | 1.6525  | train | 1.04  | 1.007  | 0.0329 | test  | 22.32  | 22.2717 | -0.0483 |
| <b>XY1</b>               | train | 18.78 | 17.528  | -1.251  | train | 1.11  | 1.125  | 0.0153 | train | 22.21  | 22.1543 | -0.0557 |
| <b>VB-MeO-FDPA</b>       | train | 18.7  | 20.223  | 1.5237  | train | 1.15  | 1.151  | 0.0012 | train | 20.89  | 22.1268 | 1.2368  |
| <b>Trux-OMeTAD</b>       | train | 18.6  | 18.408  | -0.191  | train | 1.02  | 1.018  | -0.002 | train | 23.2   | 22.801  | -0.399  |
| <b>H2</b>                | train | 18.6  | 16.892  | -1.707  | train | 1.06  | 1.0858 | 0.0258 | train | 22.93  | 23.3784 | 0.4484  |
| <b>D106</b>              | train | 18.2  | 18.906  | 0.7068  | train | 1.05  | 1.054  | 0.004  | train | 22.32  | 21.7879 | -0.5321 |
| <b>m-MTDATA</b>          | train | 18.12 | 19.653  | 1.5336  | test  | 1.035 | 1.0446 | 0.0096 | test  | 22.5   | 21.3248 | -1.1752 |
| <b>TPAC3M</b>            | train | 17.54 | 18.684  | 1.1443  | train | 1     | 1.029  | 0.0297 | train | 22.79  | 22.2647 | -0.5253 |
| <b>YJ02</b>              | test  | 17.5  | 19.3916 | 1.8916  | train | 1.04  | 1.066  | 0.0266 | train | 22.22  | 21.949  | -0.2709 |
| <b>D105</b>              | train | 17.4  | 18.609  | 1.2091  | test  | 1.04  | 1.054  | 0.014  | test  | 21.96  | 21.7828 | -0.1772 |
| <b>TPA-2,7-FLTPA-TPA</b> | train | 17.1  | 16.2    | -0.899  | train | 1.052 | 1.088  | 0.036  | train | 20.82  | 20.7623 | -0.0577 |
| <b>TTA</b>               | train | 16.7  | 18.015  | 1.3152  | train | 1.04  | 1.056  | 0.0165 | train | 20.4   | 21.6541 | 1.2541  |
| <b>TPP-SMeTAD</b>        | test  | 16.6  | 18.3141 | 1.7141  | train | 1.07  | 1.059  | 0.0102 | train | 20.15  | 21.4308 | 1.2808  |
| <b>TPA-TVT-TPA</b>       | train | 16.32 | 19.132  | 2.8128  | train | 1.07  | 1.076  | 0.0066 | train | 21.49  | 22.0131 | 0.5231  |
| <b>D104</b>              | test  | 16.2  | 18.6091 | 2.4091  | train | 1.05  | 1.054  | 0.004  | train | 21.22  | 21.7334 | 0.5134  |
| <b>CzPAF-TPA</b>         | train | 15.71 | 15.54   | -0.169  | train | 1.05  | 1.034  | 0.0157 | train | 20     | 20.3492 | 0.3492  |
| <b>TBDI</b>              | train | 15.33 | 17.296  | 1.9664  | train | 1.09  | 1.089  | -0.001 | train | 19.3   | 20.7175 | 1.4175  |

|                            |       |       |         |         |       |      |        |        |       |       |         |         |
|----------------------------|-------|-------|---------|---------|-------|------|--------|--------|-------|-------|---------|---------|
| <b>H0</b>                  | train | 13.3  | 14.243  | 0.9433  | train | 1.02 | 1.005  | -      | test  | 22.87 | 23.136  | 0.266   |
| <b>YZ22</b>                | train | 22.4  | 19.795  | -2.604  | test  | 1.1  | 1.0671 | 0.0329 | train | 25.1  | 23.0158 | -2.0842 |
| <b>SFDT-TMD</b>            | test  | 21.7  | 21.1832 | -0.5168 | train | 1.13 | 1.082  | 0.0478 | train | 24.1  | 22.9113 | -1.1887 |
| <b>MeOTTVT</b>             | test  | 21.3  | 19.1912 | -2.1088 | train | 1.11 | 1.079  | 0.0309 | train | 23.89 | 22.305  | -1.585  |
| <b>DTP-C6Th</b>            | test  | 21.04 | 17.8112 | -3.2288 | train | 1.15 | 1.162  | 0.0124 | train | 22.76 | 22.7777 | 0.0177  |
| <b>TQ4</b>                 | train | 21    | 15.941  | -5.058  | train | 1.12 | 1.089  | 0.0309 | train | 23.71 | 21.5126 | -2.1974 |
| <b>Cz-As</b>               | train | 20.9  | 20.141  | -0.758  | train | 1.08 | 1.1249 | 0.0449 | train | 24.4  | 23.1566 | -1.2433 |
| <b>DTPC13-ThTPA</b>        | train | 20.38 | 18.362  | -2.017  | train | 1.13 | 1.136  | 0.006  | test  | 22.82 | 23.2192 | 0.3992  |
| <b>TTE-2</b>               | train | 20.04 | 17.278  | -2.761  | test  | 1.11 | 1.0945 | 0.0155 | train | 23.26 | 22.887  | -0.373  |
| <b>ZT-H2</b>               | train | 19.6  | 17.329  | -2.27   | train | 1.11 | 1.063  | 0.0467 | train | 24.15 | 23.7128 | -0.4372 |
| <b>CuPc</b>                | train | 19.6  | 19.737  | 0.1374  | train | 1.1  | 1.089  | 0.0106 | test  | 23.96 | 22.9399 | -1.0201 |
| <b>H2Pc</b>                | test  | 19.6  | 19.9393 | 0.3392  | train | 1.11 | 1.089  | 0.0206 | train | 23.85 | 22.9106 | -0.9394 |
| <b>WH-1</b>                | train | 19.5  | 21.06   | 1.5602  | train | 1.08 | 1.054  | 0.0257 | train | 23.37 | 22.6234 | -0.7466 |
| <b>YN2</b>                 | train | 19.27 | 17.392  | -1.877  | train | 1.11 | 1.177  | 0.0671 | train | 22.87 | 21.9082 | -0.9618 |
| <b>WH-3</b>                | test  | 19.2  | 18.8878 | -0.3122 | test  | 1.07 | 1.0622 | 0.0078 | train | 23.05 | 22.1364 | -0.9136 |
| <b>tpa-t-FBTD</b>          | train | 18.9  | 16.662  | -2.237  | train | 1.08 | 1.061  | 0.0187 | train | 22.4  | 21.597  | -0.803  |
| <b>FA-CN</b>               | train | 18.9  | 16.792  | -2.107  | train | 1.13 | 1.141  | 0.0113 | train | 21.71 | 20.9562 | -0.7538 |
| <b>Y6-T</b>                | train | 18.8  | 16.893  | -1.906  | train | 1.1  | 1.089  | 0.0108 | train | 22.9  | 23.0279 | 0.1279  |
| <b>Cz-Py</b>               | train | 18.2  | 20.018  | 1.8184  | train | 1.13 | 1.1249 | 0.0051 | train | 21.9  | 23.1122 | 1.2122  |
| <b>YZ18</b>                | train | 18.1  | 19.823  | 1.7233  | train | 1.03 | 0.9845 | 0.0455 | train | 24.1  | 21.9921 | -2.1079 |
| <b>C202</b>                | train | 17.7  | 17.045  | -0.654  | train | 1.05 | 1.061  | 0.011  | train | 23    | 22.4395 | -0.5605 |
| <b>?, ?-COTh-Ph-OMeTAD</b> | train | 17.2  | 15.999  | -1.2    | test  | 1.05 | 1.0613 | 0.0113 | train | 21.51 | 22.979  | 1.469   |
| <b>C302</b>                | train | 16.4  | 15.134  | -1.265  | train | 1.01 | 0.9268 | 0.0832 | test  | 23.3  | 22.6587 | -0.6413 |
| <b>PhCz-4MeOTPA</b>        | train | 16    | 19.621  | 3.6212  | train | 1.08 | 1.0614 | 0.0186 | train | 21.52 | 22.3546 | 0.8346  |
| <b>X62</b>                 | train | 15.9  | 15.752  | -0.147  | train | 1.01 | 1.0019 | 0.0081 | train | 22.4  | 22.3488 | -0.0512 |
| <b>Spiro-IA</b>            | train | 15.7  | 14.665  | -1.034  | train | 1.04 | 1.001  | -0.039 | train | 22.14 | 21.5486 | -0.5914 |
| <b>WH-2</b>                | train | 15.3  | 17.738  | 2.4388  | train | 1.02 | 1.071  | 0.0513 | train | 21.95 | 21.7985 | -0.1515 |
| <b>2 DBT(QT-TPA)2</b>      | train | 13.6  | 13.263  | -0.336  | train | 1.04 | 1.0526 | 0.0126 | train | 19.23 | 18.9518 | -0.2782 |
| <b>T(EDOT-TPA)2</b>        | test  | 12.3  | 16.682  | 4.382   | train | 1.04 | 1.037  | -0.003 | test  | 20.25 | 21.7804 | 1.5304  |
| <b>TQ3</b>                 | train | 10.8  | 11.792  | 0.9928  | train | 0.95 | 0.9738 | 0.0238 | test  | 20.9  | 20.8787 | -0.0213 |
| <b>ZT-H1</b>               | train | 10    | 11.065  | 1.0655  | train | 1    | 1.016  | 0.0165 | train | 21.21 | 21.9698 | 0.7598  |
| <b>DT-BT</b>               | train | 7.3   | 12.6945 | 5.3945  | train | 0.83 | 0.849  | 0.0195 | train | 16.8  | 19.9859 | 3.1859  |
| <b>C301</b>                | train | 5.8   | 8.096   | 2.296   | train | 0.73 | 0.815  | 0.085  | test  | 19.6  | 21.58   | 1.98    |
| <b>TPADPP</b>              | train | 21.6  | 19.858  | -1.741  | train | 1.12 | 1.083  | 0.0369 | train | 23.72 | 22.6018 | -1.1182 |
| <b>MCz-cz-BTI</b>          | train | 21.3  | 21.039  | -0.26   | test  | 1.1  | 1.0943 | 0.0057 | train | 23.24 | 23.9642 | 0.7242  |
| <b>BTORCNA</b>             | train | 21.1  | 18.931  | -2.168  | train | 1.1  | 1.0798 | 0.0202 | train | 22.84 | 22.6764 | -0.1636 |

|                   |       |      |         |          |       |      |        |        |       |       |         |                          |
|-------------------|-------|------|---------|----------|-------|------|--------|--------|-------|-------|---------|--------------------------|
| <b>MPA-CZ-PTI</b> | train | 20.8 | 20.763  | -0.036   | train | 1.07 | 1.045  | 0.0247 | train | 22.84 | 23.791  | 0.951                    |
| <b>HTM-F</b>      | train | 20.5 | 19.037  | -1.463   | test  | 1.09 | 1.1279 | 0.0379 | train | 23.03 | 22.3142 | -0.7158                  |
| <b>N01</b>        | train | 20.4 | 18.883  | -1.516   | test  | 1.08 | 1.0812 | 0.0012 | train | 23.65 | 24.5296 | 0.8796                   |
| <b>BTF6</b>       | train | 20.3 | 15.382  | -4.917   | train | 1.13 | 1.038  | -0.092 | train | 22.23 | 20.6778 | -1.5522                  |
| <b>TPA-FO</b>     | train | 20.2 | 19.969  | -0.23    | train | 1.09 | 1.0515 | 0.0385 | train | 22.76 | 22.1822 | -0.5779                  |
| <b>BTORA</b>      | test  | 20.2 | 18.3659 | -1.8341  | train | 1.09 | 1.1019 | 0.0119 | train | 22.1  | 21.98   | -0.12                    |
| <b>MCZ-PA-PTI</b> | train | 20   | 20.133  | 0.1335   | train | 1.08 | 1.12   | 0.022  | train | 22.66 | 23.6247 | 0.9647                   |
| <b>HTM-H</b>      | train | 19   | 18.503  | -0.496   | train | 1.05 | 1.0613 | 0.0113 | train | 22.7  | 22.0682 | -0.6318                  |
| <b>N02</b>        | train | 18.9 | 18.772  | -0.127   | test  | 1.03 | 1.0812 | 0.0512 | train | 23.48 | 24.3814 | 0.9014                   |
| <b>BTRA</b>       | test  | 18.4 | 17.831  | -0.568   | train | 1.06 | 1.016  | 0.044  | test  | 21.64 | 21.1126 | -0.5274                  |
| <b>MPA-PA-BTI</b> | test  | 17.4 | 18.328  | 0.9283   | test  | 0.99 | 1.0638 | 0.0738 | train | 22.15 | 23.3278 | 1.1778                   |
| <b>TPA-PDO</b>    | train | 17   | 19.82   | 2.819    | train | 1.03 | 1.0551 | 0.0215 | train | 20.44 | 22.1822 | 1.7421                   |
| <b>TPADPP-Boc</b> | train | 16.3 | 18.67   | 30 2.373 | train | 1.02 | 1.0831 | 0.0631 | train | 22.22 | 22.4177 | 0.1977<br>TPADPP-<br>Boc |
| <b>BTF5</b>       | train | 11.4 | 13.14   | 1.744    | train | 0.8  | 0.918  | 0.118  | train | 21.31 | 20.6108 | -0.6992<br>BTF5          |

**Table (S7):** Experimental and predicted PCE,  $V_{OC}$ , and  $J_{SC}$  values for the test and train sets for dopant free HTMs when used in conventional n-i-p PSCs based on MALHs utilizing BF descriptors.

| HTM                      | PCE   |        |         |         | $V_{oc}$ |        |         |       | $J_{sc}$ |        |         |        |
|--------------------------|-------|--------|---------|---------|----------|--------|---------|-------|----------|--------|---------|--------|
|                          | Set   | Y(Exp) | Y(Pred) | Error   | Set      | Y(Exp) | Y(Pred) | Error | Set      | Y(Exp) | Y(Pred) | Error  |
| <b>TAT-2T-CAN</b><br>[1] | train | 20.1   | 20.4834 | 0.3834  | train    | 1.13   | 1.1479  | 0.018 | test     | 23.1   | 22.908  | -0.192 |
| <b>C-CPDT</b> [2]        | train | 19.6   | 19.2695 | -0.3305 | train    | 1.14   | 1.1052  | 0.035 | train    | 23.27  | 22.8846 | -0.385 |
| <b>FBA3</b> [3]          | train | 19.27  | 19.4947 | 0.2247  | train    | 1.09   | 1.0674  | 0.023 | train    | 22.12  | 22.5936 | 0.473  |
| <b>FBA2</b> [3]          | test  | 18.7   | 19.0024 | 0.3024  | train    | 1.06   | 1.0466  | 0.013 | train    | 22.32  | 22.6893 | 0.369  |
| <b>CJ-01</b> [4]         | train | 18.56  | 18.0767 | -0.4833 | train    | 1.113  | 1.1138  | 0.001 | train    | 22.32  | 21.7373 | -0.582 |
| <b>TPA-BPFN-TPA</b> [5]  | train | 18.4   | 17.9022 | -0.4978 | train    | 1.04   | 1.0413  | 0.001 | train    | 22.7   | 21.8408 | -0.859 |
| <b>ACE-QA-ACE</b> [6]    | test  | 18.2   | 17.3032 | -0.8968 | train    | 1.06   | 1.0559  | 0.004 | train    | 22.41  | 22.3798 | -0.030 |
| <b>PCA-1</b> [7]         | train | 18.17  | 18.245  | 0.075   | train    | 1.062  | 1.0576  | 0.004 | train    | 22.3   | 21.8148 | 0.4852 |
| <b>IDF-SFXPh</b> [8]     | train | 17.6   | 17.3834 | -0.2166 | test     | 1.05   | 1.0409  | 0.009 | train    | 21.5   | 21.1616 | -0.338 |
| <b>BTDTTP</b> [9]        | train | 17.6   | 17.1118 | -0.4882 | train    | 0.97   | 0.9622  | 0.008 | train    | 25.73  | 25.8409 | 0.110  |
| <b>TPA-3T-DCV</b> [1]    | test  | 17.6   | 16.4801 | -1.1199 | train    | 1.08   | 1.0762  | 0.004 | train    | 23     | 22.642  | -0.358 |
| <b>TAT-2T-DCV</b> [1]    | train | 17.6   | 17.96   | 0.36    | train    | 1.08   | 1.1036  | 0.024 | train    | 23     | 23.1368 | 0.1368 |
| <b>TPA-ANT-TPA</b> [10]  | train | 17.5   | 17.548  | 0.048   | train    | 1.03   | 1.0284  | 0.002 | train    | 21.07  | 21.1402 | 0.070  |
| <b>BTPA-TCNE</b> [11]    | train | 16.94  | 17.3003 | 0.3603  | train    | 1.04   | 1.0699  | 0.029 | train    | 20.84  | 21.0275 | 0.187  |
| <b>BTBDT</b> [12]        | train | 16.9   | 16.7598 | -0.1402 | train    | 0.95   | 0.9446  | 0.005 | test     | 24.68  | 24.0683 | -0.611 |
| <b>FBA1</b> [13]         | train | 16.8   | 16.5164 | -0.2836 | train    | 1.05   | 1.0328  | 0.017 | test     | 21.57  | 21.7864 | 0.216  |

|                 |       |      |         |         |       |       |        |       |       |        |         |        |
|-----------------|-------|------|---------|---------|-------|-------|--------|-------|-------|--------|---------|--------|
| Z1011 [13]      | train | 16.3 | 16.0897 | -0.2103 | test  | 1.096 | 1.0554 | -     | train | 20.52  | 20.9872 | 0.467  |
| Z34 [14]        | test  | 16.1 | 16.3975 | 0.2975  | train | 1.055 | 1.0516 | 0.003 | test  | 21.245 | 21.1242 | -0.121 |
| CQ2 [15]        | train | 15.2 | 14.7716 | -0.4284 | test  | 1.02  | 1.0052 | 0.015 | train | 20.57  | 20.5786 | 0.008  |
| DTBT [16]       | train | 11.6 | 12.1195 | 0.5195  | test  | 0.93  | 0.9391 | 0.009 | train | 22.2   | 22.2487 | 0.048  |
| DTBS [17]       | train | 15   | 13.0839 | -1.9161 | train | 0.96  | 0.936  | 0.024 | train | 22.78  | 22.2487 | -0.531 |
| DOR3T-TBDT [18] | train | 14.9 | 14.5732 | -0.3268 | train | 0.97  | 0.9774 | 0.007 | train | 20.7   | 20.6102 | -0.089 |
| X25 [15]        | train | 14.4 | 15.3435 | 0.9435  | train | 1.01  | 1.0295 | 0.019 | train | 19.64  | 20.305  | 0.665  |
| HTM1 [19]       | train | 13.4 | 12.9748 | -0.4252 | train | 0.971 | 0.9494 | 0.022 | train | 19.3   | 19.2772 | 0.0228 |
| DTBF [20]       | test  | 13.3 | 12.6325 | -0.6675 | test  | 0.95  | 0.9391 | 0.011 | test  | 22.48  | 22.2487 | 0.2313 |
| T-CPDT [2]      | train | 11.4 | 14.2325 | 2.8325  | train | 0.88  | 0.9436 | 0.064 | train | 21.37  | 22.5152 | 1.145  |

**Table (S8):** Experimental and predicted PCE,  $V_{OC}$ , and  $J_{SC}$  values for the test and train sets for dopant free HTMs when used in inverted p-i-n PSCs based on MALHs utilizing binary fingerprints descriptors.

| HTM                    | PCE   |        |         |         | $V_{OC}$ |        |         |        | $J_{SC}$ |        |         |        |
|------------------------|-------|--------|---------|---------|----------|--------|---------|--------|----------|--------|---------|--------|
|                        | Set   | Y(Exp) | Y(Pred) | Error   | Set      | Y(Exp) | Y(Pred) | Error  | Set      | Y(Exp) | Y(Pred) | Error  |
| DFBT-MTP [21]          | train | 21.2   | 21.5444 | 0.3444  | train    | 1.16   | 1.1635  | 0.0035 | train    | 22.15  | 22.4381 | 0.288  |
| MPA-BTTI [22]          | train | 21.17  | 21.0147 | -0.1553 | train    | 1.12   | 1.1172  | -0.003 | train    | 23.23  | 22.9845 | -0.245 |
| DBTMT [23]             | train | 21.1   | 22.4515 | 1.3515  | train    | 1.12   | 1.1209  | 0.001  | train    | 22.7   | 23.3823 | 0.682  |
| TPE-S [24]             | train | 21     | 19.443  | -1.557  | train    | 1.13   | 1.1072  | 0.0228 | train    | 23.3   | 22.5305 | -0.769 |
| DFH [25]               | train | 20.6   | 20.0505 | -0.5495 | train    | 1.09   | 1.0798  | -0.010 | train    | 22.7   | 22.7236 | 0.024  |
| DBFMT [26]             | train | 20.5   | 20.7531 | 0.2531  | train    | 1.07   | 1.068   | -0.002 | test     | 23.7   | 22.8781 | -0.822 |
| DPh-DNTT [27]          | test  | 20.1   | 19.2165 | -0.8835 | train    | 1.1    | 1.1021  | 0.002  | train    | 22.56  | 22.2283 | -0.332 |
| BT-MTP [28]            | train | 20.1   | 19.8603 | -0.2397 | test     | 1.1    | 1.1025  | 0.002  | train    | 23.01  | 22.8578 | -0.152 |
| YJ01 [29]              | train | 19.8   | 18.1978 | -1.6022 | test     | 1.08   | 1.0608  | -0.019 | train    | 22.53  | 22.3546 | -0.175 |
| BDT-POZ [30]           | train | 19.16  | 19.1307 | -0.0293 | test     | 1.04   | 1.0426  | 0.003  | train    | 22.56  | 22.1669 | -0.393 |
| FMT [31]               | test  | 19.06  | 19.5818 | 0.5218  | train    | 1.07   | 1.0837  | 0.014  | test     | 22.52  | 22.0388 | -0.481 |
| TAPC [32]              | train | 18.8   | 18.5655 | -0.2345 | test     | 1.04   | 1.0694  | 0.029  | train    | 22.32  | 22.521  | 0.201  |
| XY1 [33]               | train | 18.78  | 18.7282 | -0.0518 | train    | 1.11   | 1.1255  | 0.015  | test     | 22.21  | 22.0456 | -0.164 |
| VB-MeO-FDPA [34]       | train | 18.7   | 18.744  | 0.044   | train    | 1.15   | 1.1242  | -0.026 | train    | 20.89  | 21.3428 | 0.453  |
| Trux-OMeTAD [35]       | train | 18.6   | 18.4662 | -0.1338 | train    | 1.02   | 1.0094  | -0.010 | train    | 23.2   | 22.9888 | -0.211 |
| H2 [36]                | train | 18.6   | 18.896  | 0.296   | train    | 1.06   | 1.0545  | 0.0055 | test     | 22.93  | 22.9643 | 0.034  |
| D106 [37]              | test  | 18.2   | 17.0692 | -1.1308 | train    | 1.05   | 1.0415  | -0.008 | train    | 22.32  | 21.7771 | -0.543 |
| m-MTDATA [38]          | train | 18.12  | 18.0468 | -0.0732 | train    | 1.035  | 1.0511  | 0.016  | train    | 22.5   | 22.5308 | 0.031  |
| TPAC3M [39]            | train | 17.54  | 17.6362 | 0.0962  | train    | 1      | 1.0092  | 0.009  | train    | 22.79  | 22.5598 | -0.230 |
| YJ02 [40]              | train | 17.5   | 17.3719 | -0.1281 | train    | 1.04   | 1.0576  | 0.017  | train    | 22.22  | 22.1691 | -0.051 |
| D105 [37]              | train | 17.4   | 17.0692 | -0.3308 | train    | 1.04   | 1.0376  | -0.002 | train    | 21.96  | 21.6733 | -0.287 |
| TPA-2,7-FLTPA-TPA [41] | test  | 17.1   | 17.1138 | 0.0138  | train    | 1.052  | 1.0325  | -0.019 | test     | 20.82  | 21.1628 | 0.343  |
| TTA [42]               | train | 16.7   | 17.2157 | 0.5157  | train    | 1.04   | 1.0605  | 0.020  | train    | 20.4   | 20.254  | -0.146 |

|                         |       |       |         |         |       |      |        |        |       |       |         |        |
|-------------------------|-------|-------|---------|---------|-------|------|--------|--------|-------|-------|---------|--------|
| <b>TPP-SMeTAD</b> [43]  | train | 16.6  | 17.5165 | 0.9165  | train | 1.07 | 1.09   | 0.020  | train | 20.15 | 21.0848 | 0.935  |
| <b>TPA-TVt-TPA</b> [44] | train | 16.32 | 17.0022 | 0.6822  | train | 1.07 | 1.081  | 0.01   | train | 21.49 | 21.9853 | 0.495  |
| <b>D104</b> [37]        | test  | 16.2  | 17.0692 | 0.8692  | train | 1.05 | 1.0412 | -0.009 | train | 21.22 | 21.6733 | 0.453  |
| <b>CzPAF-TPA</b> [45]   | train | 15.71 | 15.3391 | -0.3709 | test  | 1.05 | 1.0347 | -0.015 | train | 20    | 19.9852 | -0.015 |
| <b>TBDI</b> [46]        | train | 15.33 | 14.8467 | -0.4833 | train | 1.09 | 1.0735 | 0.0165 | train | 19.3  | 19.0653 | 0.2347 |
| <b>H0</b> [36]          | train | 13.3  | 14.7398 | 1.4398  | train | 1.02 | 1.0253 | 0.0053 | train | 22.87 | 23.0925 | 0.2225 |

**Table (S9):** Experimental and predicted PCE,  $V_{OC}$ , and  $J_{SC}$  values for the test and train sets for dopant free HTMs when used in conventional (n-i-p) PSCs based on mixed CLHs.

| HTM                                                                | PCE   |        |         |        | $V_{OC}$ |        |         |         | $J_{SC}$ |        |         |        |
|--------------------------------------------------------------------|-------|--------|---------|--------|----------|--------|---------|---------|----------|--------|---------|--------|
|                                                                    | Set   | Y(Exp) | Y(Pred) | Error  | Set      | Y(Exp) | Y(Pred) | Error   | Set      | Y(Exp) | Y(Pred) | Error  |
| <b>YZ22</b> [47]                                                   | train | 22.4   | 20.6734 | -1.727 | train    | 1.10   | 1.0723  | -0.0277 | train    | 25.1   | 24.5351 | -0.565 |
| <b>SFDT-TMD</b> [48]                                               | test  | 21.7   | 19.0695 | -2.630 | train    | 1.13   | 1.0846  | -0.0454 | train    | 24.1   | 23.6637 | -0.436 |
| <b>MeOTTVT</b> [49]                                                | train | 21.3   | 19.6635 | -1.636 | test     | 1.11   | 1.0536  | -0.0564 | train    | 23.89  | 23.642  | -0.248 |
| <b>DTP-C6Th</b> [50]                                               | train | 21.04  | 21.1295 | 0.089  | test     | 1.15   | 1.1143  | -0.0357 | test     | 22.76  | 22.9099 | 0.149  |
| <b>TQ4</b> [51]                                                    | train | 21     | 18.8612 | -2.139 | train    | 1.12   | 1.0632  | -0.0568 | train    | 23.71  | 22.743  | -0.967 |
| <b>Cz-As</b> [52]                                                  | train | 20.9   | 18.7362 | -2.164 | train    | 1.08   | 1.0777  | -0.0023 | train    | 24.4   | 22.6443 | -1.755 |
| <b>DTPC13-ThTPA</b> [53]                                           | test  | 20.38  | 20.0375 | -0.342 | train    | 1.13   | 1.1264  | -0.0036 | train    | 22.82  | 22.9424 | 0.122  |
| <b>TTE-2</b> [54]                                                  | train | 20.04  | 21.5815 | 1.541  | train    | 1.11   | 1.1377  | 0.0277  | train    | 23.26  | 24.0227 | 0.762  |
| <b>ZT-H2</b> [55]                                                  | test  | 19.6   | 18.2612 | -1.339 | train    | 1.11   | 1.1276  | 0.0176  | test     | 24.15  | 23.6662 | -0.484 |
| <b>CuPc</b> [56]                                                   | train | 19.6   | 19.3444 | -0.256 | test     | 1.10   | 1.082   | -0.018  | train    | 23.96  | 24.2379 | 0.278  |
| <b>H2Pc</b> [56]                                                   | train | 19.6   | 19.2109 | -0.389 | train    | 1.11   | 1.0845  | -0.0255 | train    | 23.85  | 24.1973 | 0.347  |
| <b>WH-1</b> [57]                                                   | train | 19.5   | 19.1644 | -0.336 | train    | 1.08   | 1.0747  | -0.0053 | train    | 23.37  | 23.5002 | 0.130  |
| <b>YN2</b> [58]                                                    | train | 19.27  | 17.8935 | -1.376 | train    | 1.11   | 1.0868  | -0.0232 | train    | 22.87  | 22.5398 | -0.330 |
| <b>WH-3</b> [59]                                                   | train | 19.2   | 18.28   | -0.920 | train    | 1.07   | 1.0437  | -0.0263 | test     | 23.05  | 22.8557 | -0.194 |
| <b>tpa-t-FBTD</b> [60]                                             | train | 18.9   | 18.6796 | -0.220 | train    | 1.08   | 1.0709  | -0.0091 | train    | 22.4   | 22.3783 | -0.022 |
| <b>FA-CN</b> [61]                                                  | train | 18.9   | 18.605  | -0.295 | train    | 1.13   | 1.1346  | 0.0046  | test     | 21.71  | 21.9536 | 0.244  |
| <b>Y6-T</b> [62]                                                   | train | 18.8   | 20.4046 | 1.605  | train    | 1.10   | 1.1431  | 0.0431  | train    | 22.9   | 23.458  | 0.56   |
| <b>Cz-Py</b> [52]                                                  | train | 18.2   | 18.7076 | 0.508  | train    | 1.13   | 1.0944  | -0.0356 | train    | 21.9   | 22.4128 | 0.513  |
| <b>YZ18</b> [47]                                                   | test  | 18.1   | 18.3932 | 0.293  | train    | 1.03   | 1.0382  | 0.0082  | train    | 24.1   | 23.7412 | -0.359 |
| <b>C202</b> [63]                                                   | train | 17.7   | 18.102  | 0.402  | test     | 1.05   | 1.0558  | 0.0058  | train    | 23     | 23.0689 | 0.069  |
| <b><math>\alpha</math>, <math>\beta</math>-COTh-Ph-OMeTAD</b> [64] | train | 17.2   | 20.5569 | 3.357  | train    | 1.05   | 1.1094  | 0.0594  | train    | 21.51  | 22.9305 | 1.421  |
| <b>C302</b> [65]                                                   | train | 16.4   | 16.0269 | -0.373 | train    | 1.01   | 1.0011  | -0.0089 | train    | 23.3   | 23.1884 | -0.112 |
| <b>PhCz-4MeOTPA</b> [66]                                           | train | 16     | 17.1082 | 1.108  | train    | 1.08   | 1.0748  | -0.0052 | train    | 21.52  | 22.1857 | 0.666  |
| <b>X62</b> [67]                                                    | test  | 15.9   | 18.4159 | 2.516  | train    | 1.01   | 1.0358  | 0.0258  | train    | 22.4   | 22.7265 | 0.326  |
| <b>Spiro-IA</b> [68]                                               | train | 15.7   | 14.1299 | -1.570 | test     | 1.04   | 0.9994  | -0.0406 | train    | 22.14  | 21.2679 | -0.872 |
| <b>WH-2</b> [59]                                                   | train | 15.3   | 17.3873 | 2.087  | train    | 1.02   | 1.0357  | 0.0157  | train    | 21.95  | 22.5337 | 0.584  |
| <b>DBT(QT-TPA)<sub>2</sub></b> [68]                                | test  | 13.6   | 14.9193 | 1.319  | train    | 1.04   | 1.0404  | 0.0004  | test     | 19.23  | 20.4922 | 1.262  |
| <b>T(EDOT-TPA)<sub>2</sub></b> [69]                                | train | 12.3   | 13.7034 | 1.403  | train    | 1.04   | 1.061   | 0.021   | train    | 20.25  | 20.3086 | 0.059  |
| <b>TQ3</b> [51]                                                    | train | 10.8   | 10.2275 | -0.572 | test     | 0.95   | 0.9526  | 0.0026  | train    | 20.9   | 19.747  | -1.15  |
| <b>ZT-H1</b> [55]                                                  | train | 10     | 10.3588 | 0.359  | train    | 1.00   | 1.0044  | 0.0044  | test     | 21.21  | 22.2224 | 1.012  |
| <b>DT-BT</b> [70]                                                  | train | 7.3    | 9.9204  | 2.620  | train    | 0.83   | 0.8922  | 0.0622  | train    | 16.8   | 18.2419 | 1.442  |
| <b>C301</b> [65]                                                   | train | 5.8    | 4.6935  | -1.106 | train    | 0.73   | 0.7146  | -0.0154 | train    | 19.6   | 19.142  | -0.458 |

**Table (S10):** Experimental and predicted PCE,  $V_{OC}$ , and  $J_{SC}$  values for the test and train sets for dopant-free HTMs when used in inverted p-i-n PSCs based on mixed CLHs.

| HTM                    | PCE   |        |         |        | $V_{OC}$ |        |         |         | $J_{SC}$ |        |         |        |
|------------------------|-------|--------|---------|--------|----------|--------|---------|---------|----------|--------|---------|--------|
|                        | Set   | Y(Exp) | Y(Pred) | Error  | Set      | Y(Exp) | Y(Pred) | Error   | Set      | Y(Exp) | Y(Pred) | Error  |
| <b>TPADPP</b> [71]     | train | 21.6   | 19.1459 | -2.454 | train    | 1.12   | 1.0789  | -0.0411 | train    | 23.72  | 22.8498 | -0.870 |
| <b>MCz-cz-BTI</b> [72] | test  | 21.3   | 20.5839 | -0.716 | train    | 1.1    | 1.1201  | 0.0201  | train    | 23.24  | 23.4828 | 0.243  |
| <b>BTORCNA</b> [73]    | train | 21.1   | 21.0862 | -0.014 | train    | 1.1    | 1.0994  | -0.0006 | train    | 22.84  | 22.423  | -0.417 |
| <b>MPA-CZ-PTI</b> [72] | train | 20.8   | 20.2339 | -0.566 | test     | 1.07   | 1.0797  | 0.0097  | test     | 22.84  | 22.7844 | -0.056 |

|                            |       |      |         |        |       |      |        |         |       |       |         |        |
|----------------------------|-------|------|---------|--------|-------|------|--------|---------|-------|-------|---------|--------|
| HTM-F <sup>[74]</sup>      | train | 20.5 | 19.1836 | -1.316 | train | 1.09 | 1.0374 | -0.0526 | train | 23.03 | 22.7339 | -0.296 |
| N01 <sup>[75]</sup>        | train | 20.4 | 21.1483 | 0.748  | train | 1.08 | 1.0968 | 0.0168  | test  | 23.65 | 23.856  | 0.206  |
| BTF6 <sup>[76]</sup>       | train | 20.3 | 16.5064 | -3.794 | train | 1.13 | 1.0009 | -0.1291 | train | 22.23 | 21.7526 | -0.477 |
| TPA-FO <sup>[77]</sup>     | train | 20.2 | 18.8534 | -1.347 | train | 1.09 | 1.0819 | -0.0081 | train | 22.76 | 21.8814 | -0.879 |
| BTORA <sup>[73]</sup>      | test  | 20.2 | 20.4188 | 0.219  | test  | 1.09 | 1.0853 | -0.0047 | train | 22.1  | 22.4439 | 0.344  |
| MCZ-PA-PTI <sup>[72]</sup> | train | 20   | 19.869  | -0.131 | train | 1.08 | 1.0634 | -0.0166 | train | 22.66 | 23.0055 | 0.345  |
| HTM-H <sup>[78]</sup>      | train | 19   | 19.2417 | 0.242  | train | 1.05 | 1.04   | -0.01   | train | 22.7  | 22.4097 | -0.290 |
| N02 <sup>[75]</sup>        | train | 18.9 | 20.9026 | 2.003  | train | 1.03 | 1.0875 | 0.0575  | train | 23.48 | 23.856  | 0.376  |
| BTRA <sup>[73]</sup>       | test  | 18.4 | 19.3275 | 0.927  | test  | 1.06 | 1.0572 | -0.0028 | train | 21.64 | 22.1964 | 0.556  |
| MPA-PA-BTI <sup>[72]</sup> | train | 17.4 | 18.8626 | 1.463  | train | 0.99 | 1.0182 | 0.0282  | test  | 22.15 | 22.6347 | 0.485  |
| TPA-PDO <sup>[77]</sup>    | train | 17   | 18.2141 | 1.214  | train | 1.03 | 1.0733 | 0.0433  | train | 20.44 | 21.2302 | 0.790  |
| TPADPP-Boc <sup>[71]</sup> | train | 16.3 | 18.2774 | 1.977  | train | 1.02 | 1.0602 | 0.0402  | train | 22.22 | 22.4288 | 0.209  |
| BTF5 <sup>[76]</sup>       | train | 11.4 | 13.3748 | 1.975  | train | 0.8  | 0.8519 | 0.0519  | train | 21.31 | 21.6758 | 0.366  |

### **Overview of the AutoQSAR Methodology**

The AutoQSAR workflow is outlined in **Figure 3** in the manuscript. In this workflow, a subset of descriptors is independently applied to various machine learning methods, including Kernel Partial Least Squares (KPLS), Partial Least Squares (PLS), Multiple Linear Regression (MLR), and Principal Component Regression (PCR). These models are trained using continuous independent variables, which is the focus of this study.

**Number of Models to Build for Each Model Type:** AutoQSAR enables users to specify the number of models to construct for each model type. A model is defined by randomly selecting training and test sets based on the percentage split specified in the AutoQSAR panel. Each training set is utilized to build models using all supported machine learning methods (KPLS, PLS, MLR, and PCR) alongside relevant combinations of independent variables (e.g., descriptors). In this study, the AutoQSAR panel was used to develop a total of 50 models, **Figure S1**. The performance of each model is evaluated based on its predictive ability on the test set, resulting in a quality score for each model. Model accuracy is scored on a scale from 0 to 1, where a score of 1 represents perfect predictions and a score of 0 indicates entirely incorrect predictions.

**Top Models and Predictions:** AutoQSAR can identify the top models for further predictions. In this study, we retained the top 10 ranked models. Predictions can be made using either individual models or a consensus of the top 10 models. For continuously valued dependent variables, the

consensus prediction is calculated as the arithmetic mean of the predictions from the selected models, see **Figure S1**.

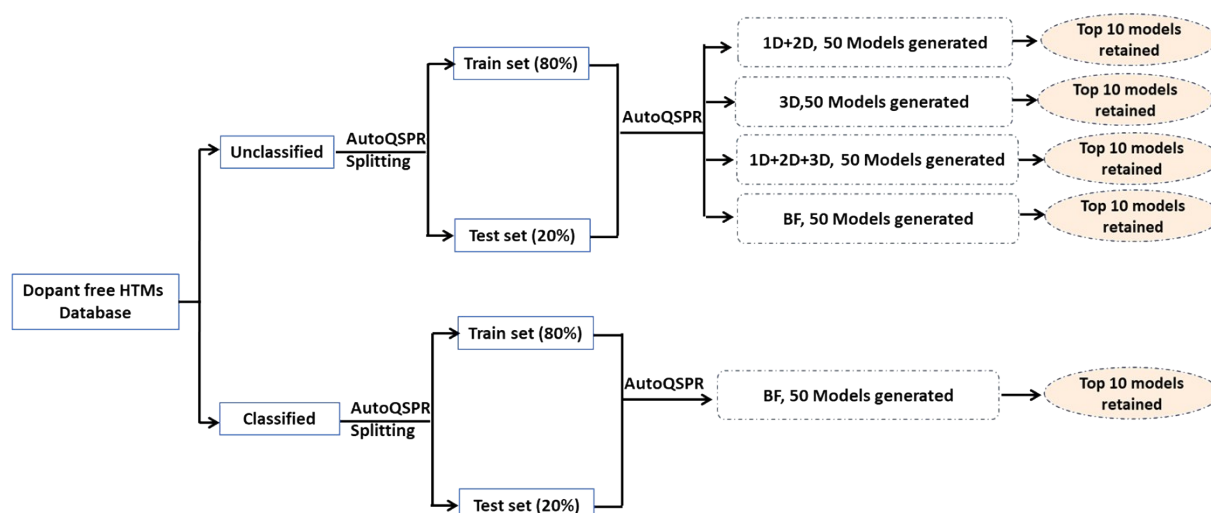

**Fig. S1.** Strategy used for building QSPR models with the assistance of AutoQSPR. The top-ranked models were selected based on their ranking scores. BF refers to binary fingerprints.

## Model Visualization

### 1- Visualizing Conventional (n-i-p) PSCs based on MALX<sub>3</sub> for PCE

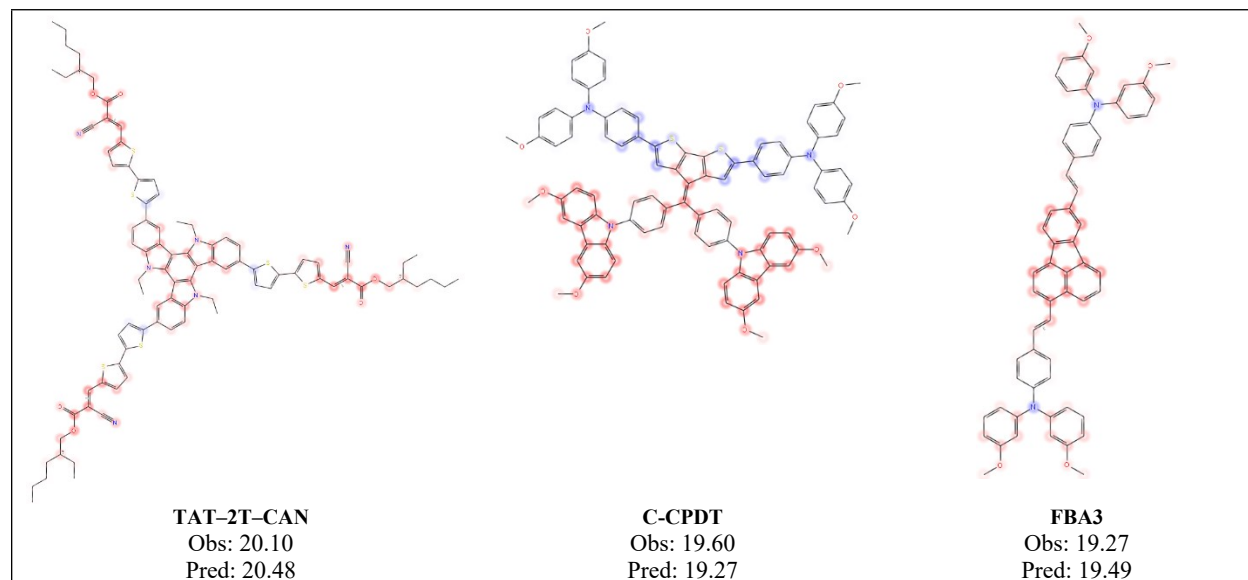

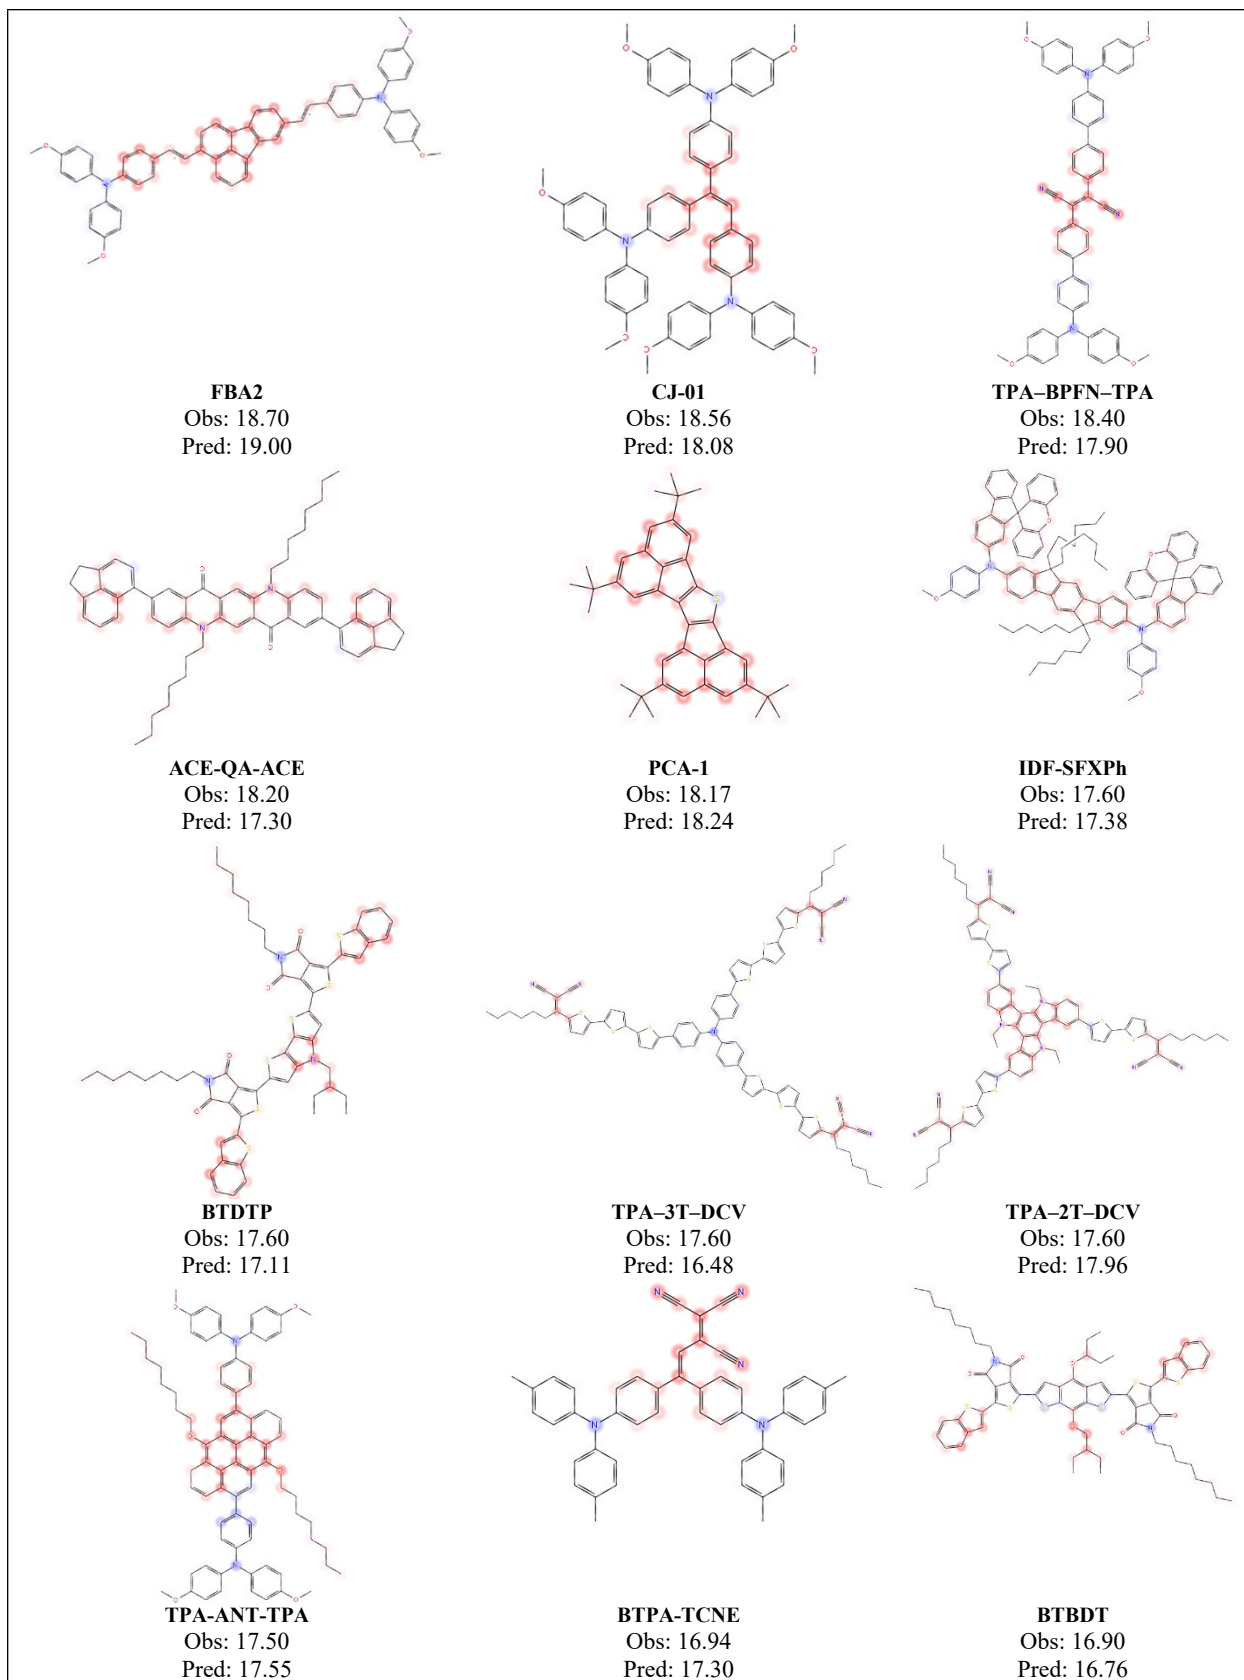



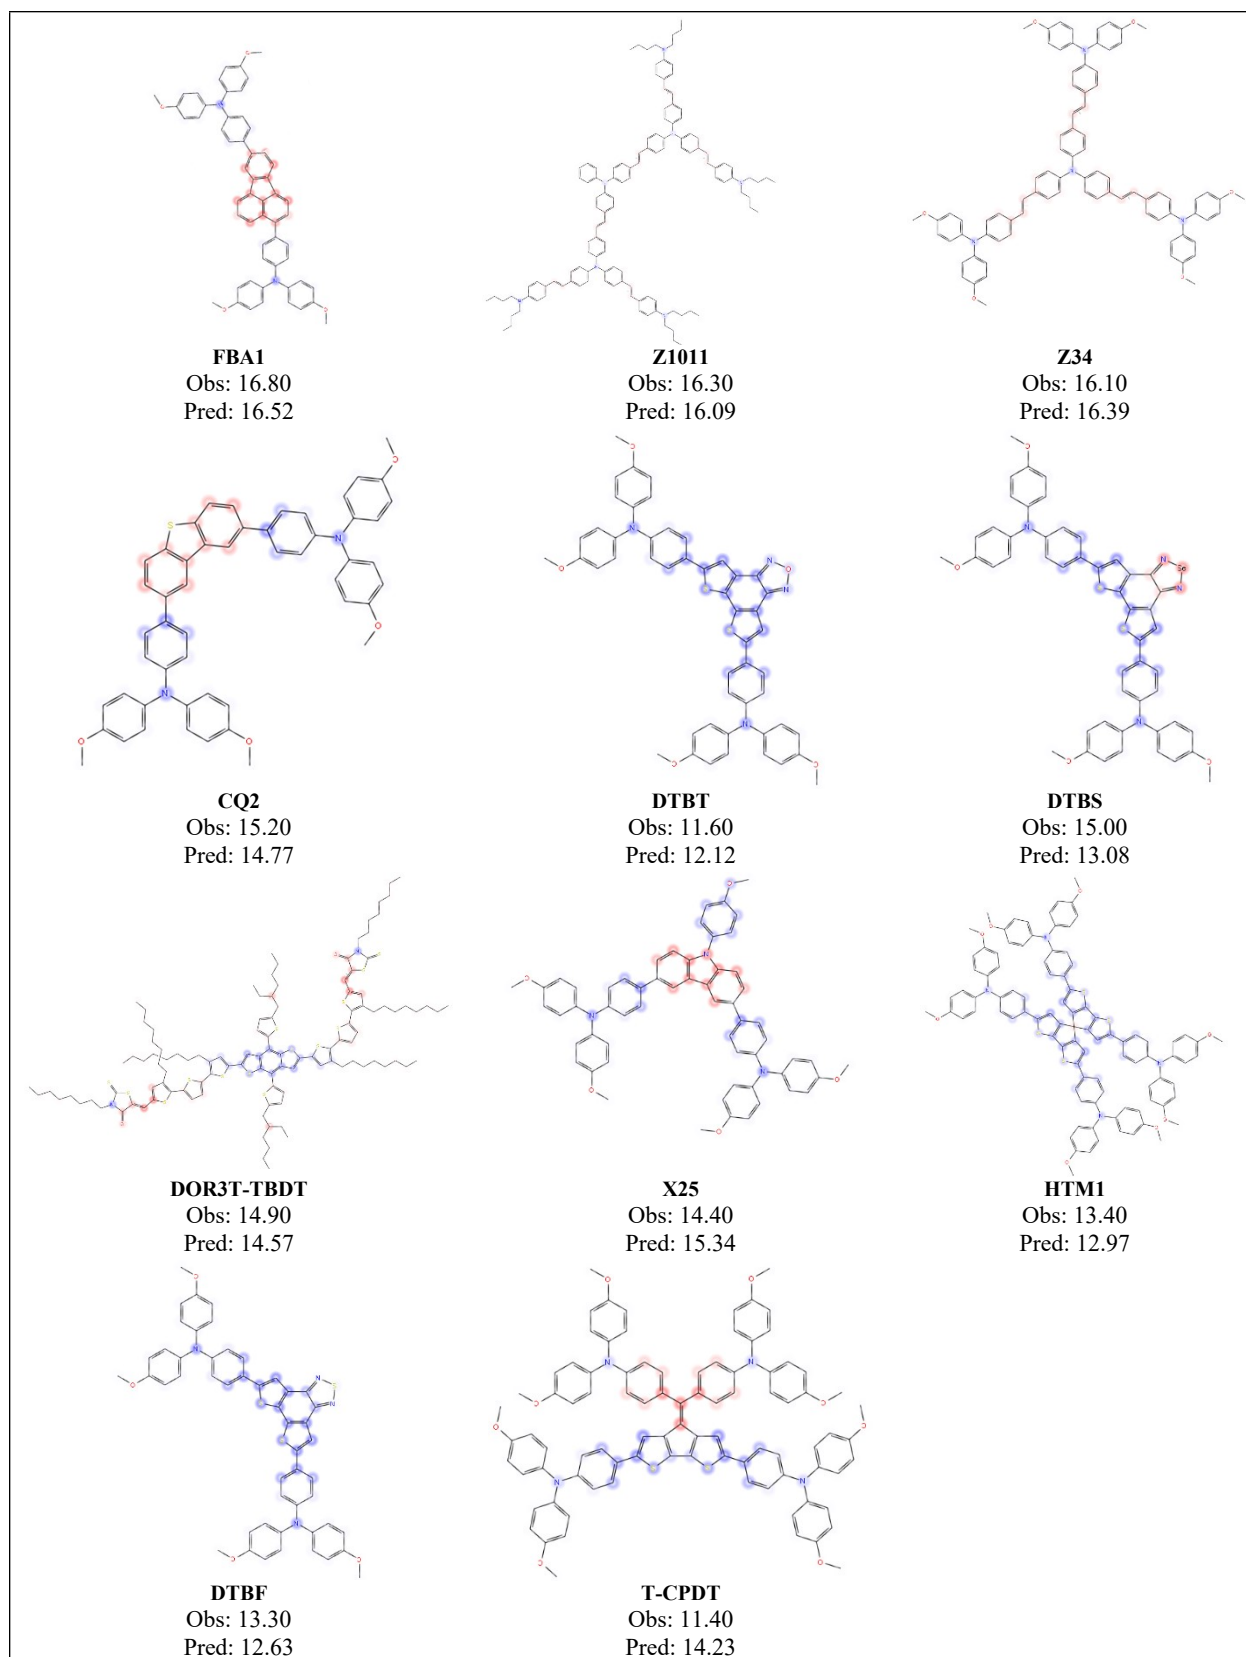

**Figure S2.** Visualization of atomic effects for KPLS model built for the power conversion efficiency from dendritic fingerprints for dopant free HTMs used in conventional (n-i-p) PSCs based on MAPbX<sub>3</sub>. Prediction of Marcus

theory reorganization energies *are* shown with positive or negative site contributions shown as red and blue, respectively.

## 2- Visualizing Inverted (p-i-n) PSCs based on MAPbX<sub>3</sub> for PCE

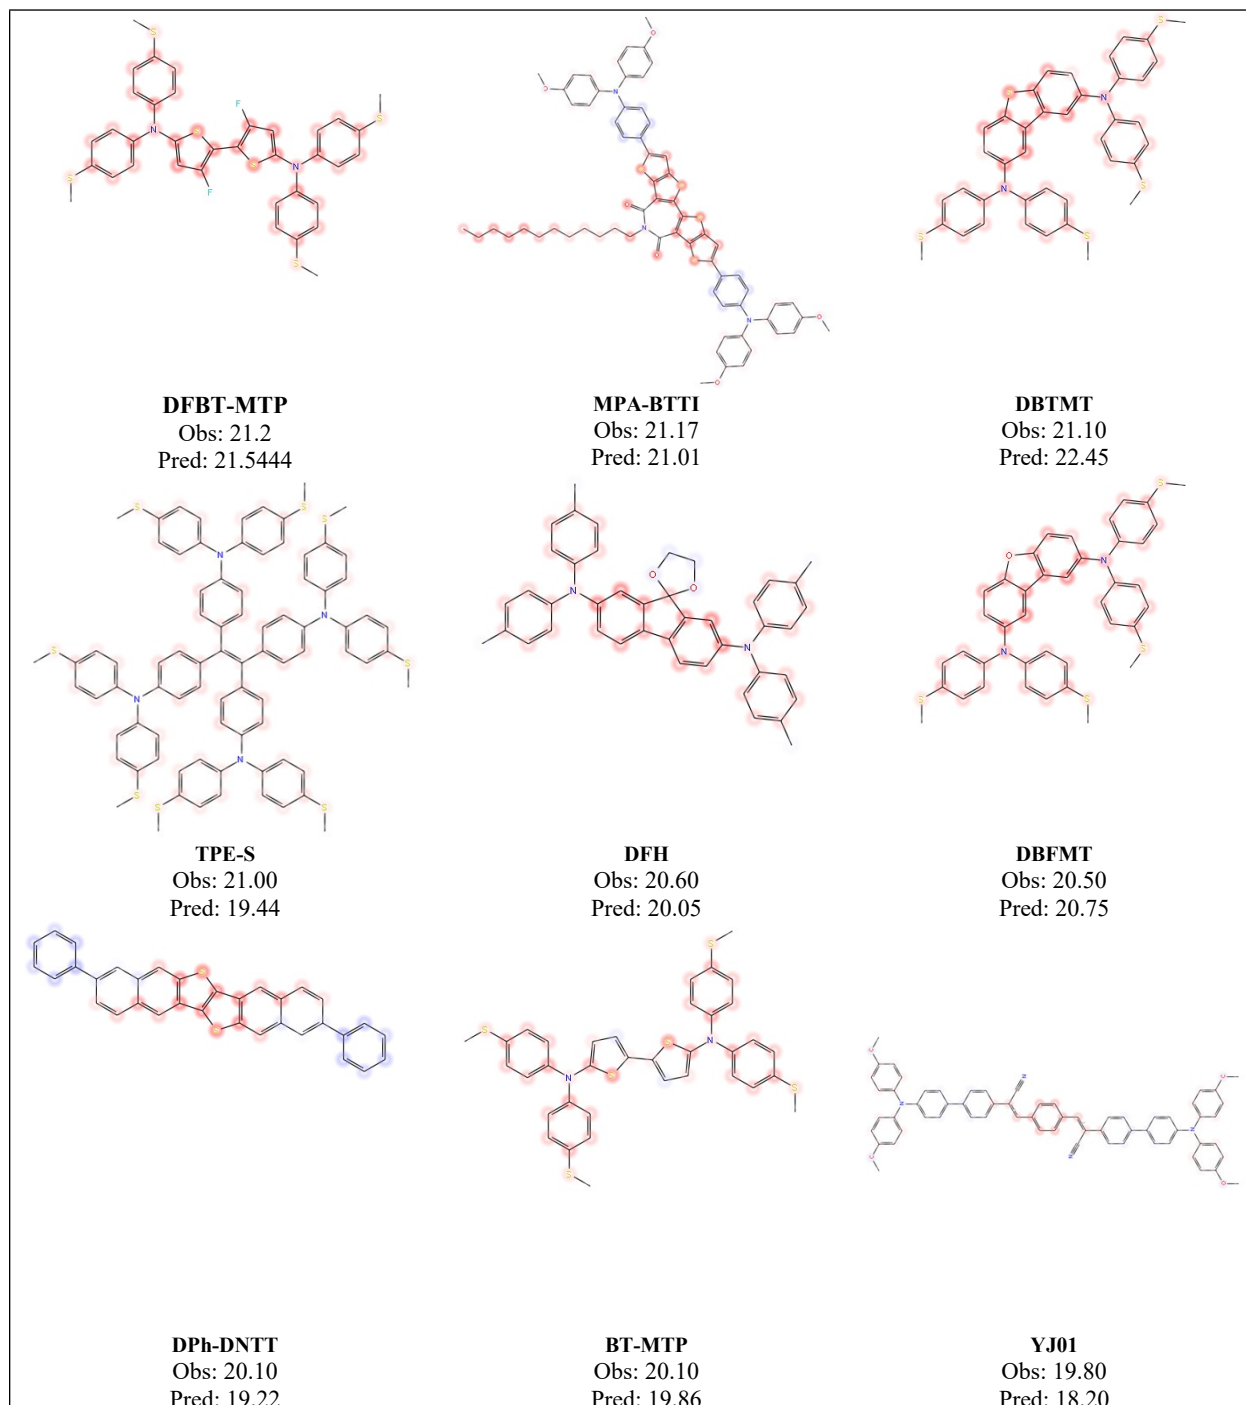

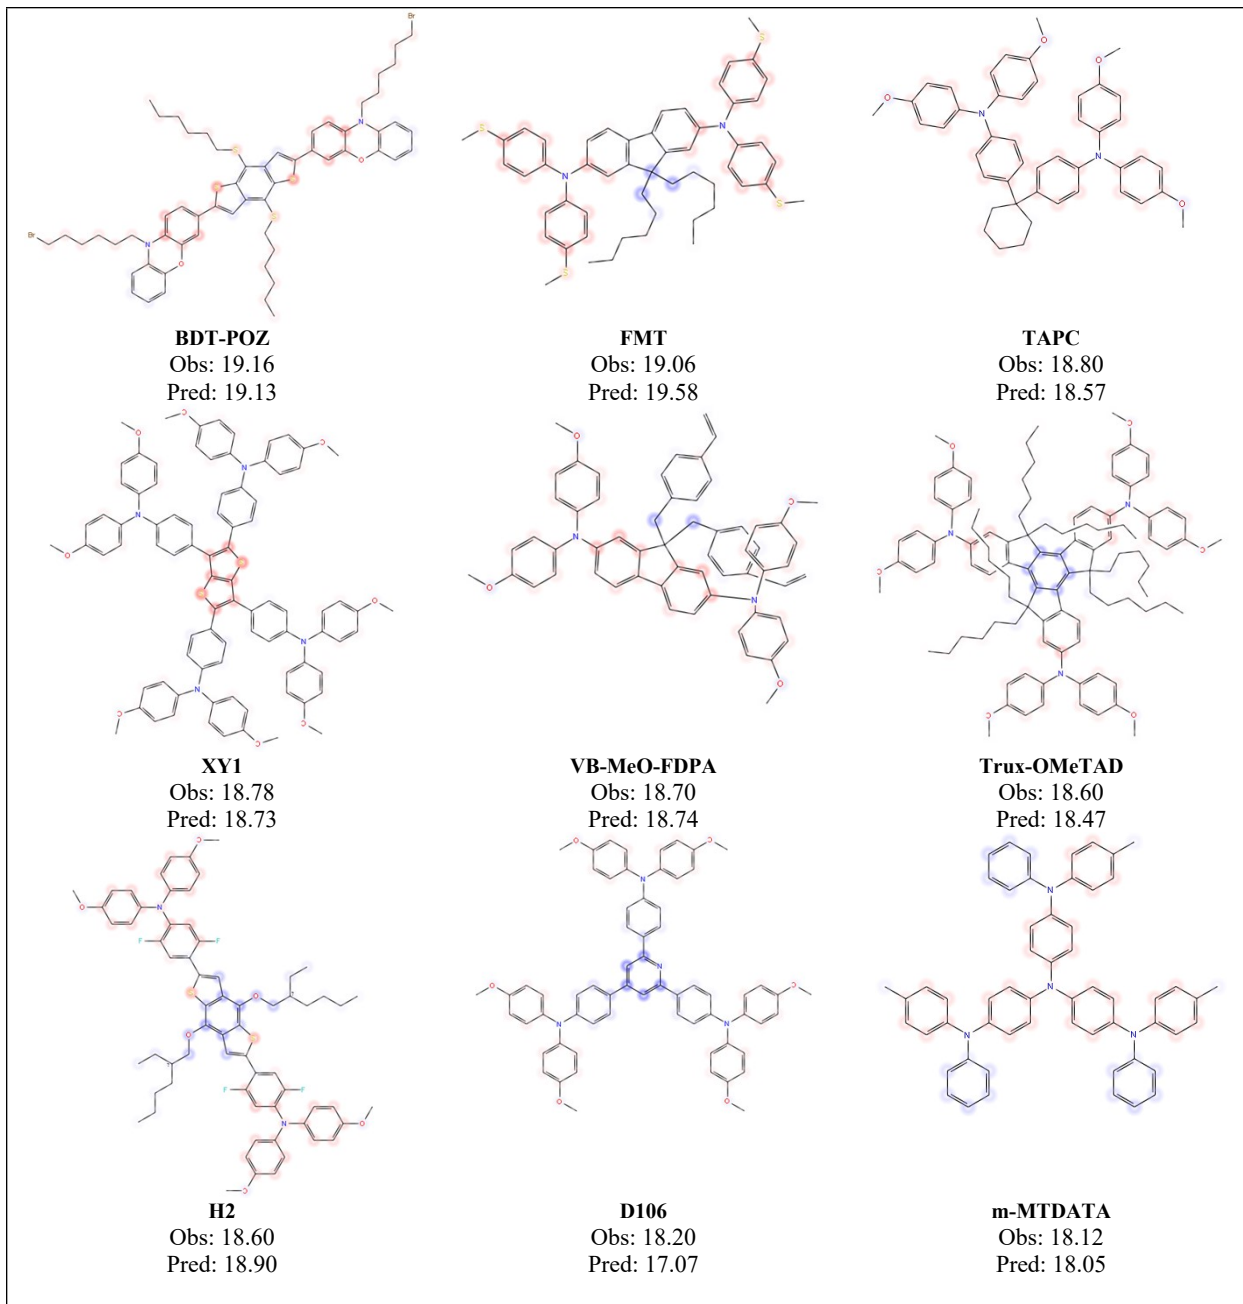

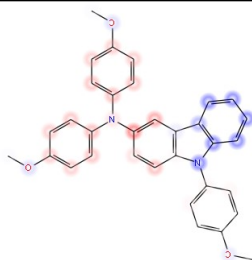

**TPAC3M**  
Obs: 17.54  
Pred: 17.64

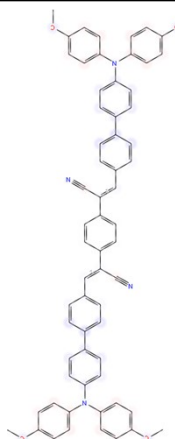

**YJ02**  
Obs: 17.50  
Pred: 17.37

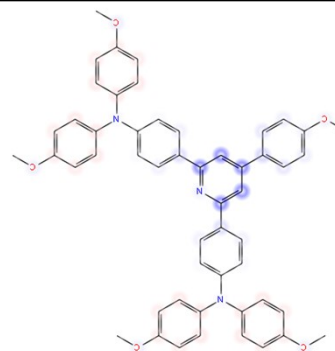

**D105**  
Obs: 17.40  
Pred: 17.07

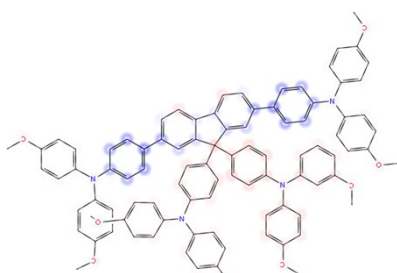

**TPA-2,7-FLTPA-TPA**  
Obs: 17.10  
Pred: 17.11

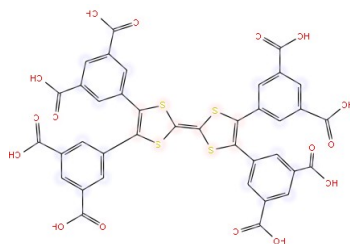

**TTA**  
Obs: 16.70  
Pred: 17.22

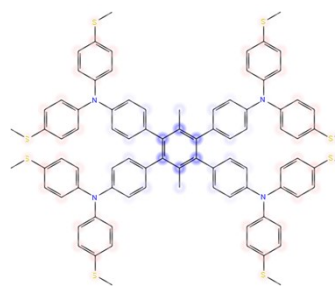

**TPP-SMeTAD**  
Obs: 16.60  
Pred: 17.52

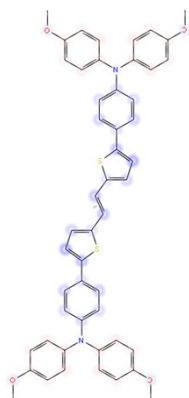

**TPA-TVT-TPA**  
Obs: 16.32  
Pred: 17.00

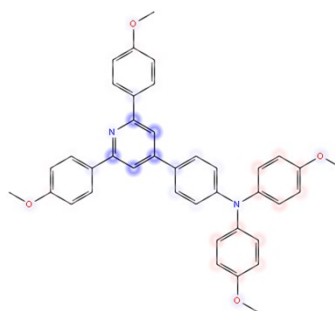

**D104**  
Obs: 16.20  
Pred: 17.07

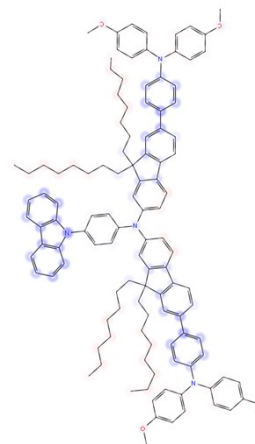

**CzPAF-TPA**  
Obs: 15.71  
Pred: 15.34

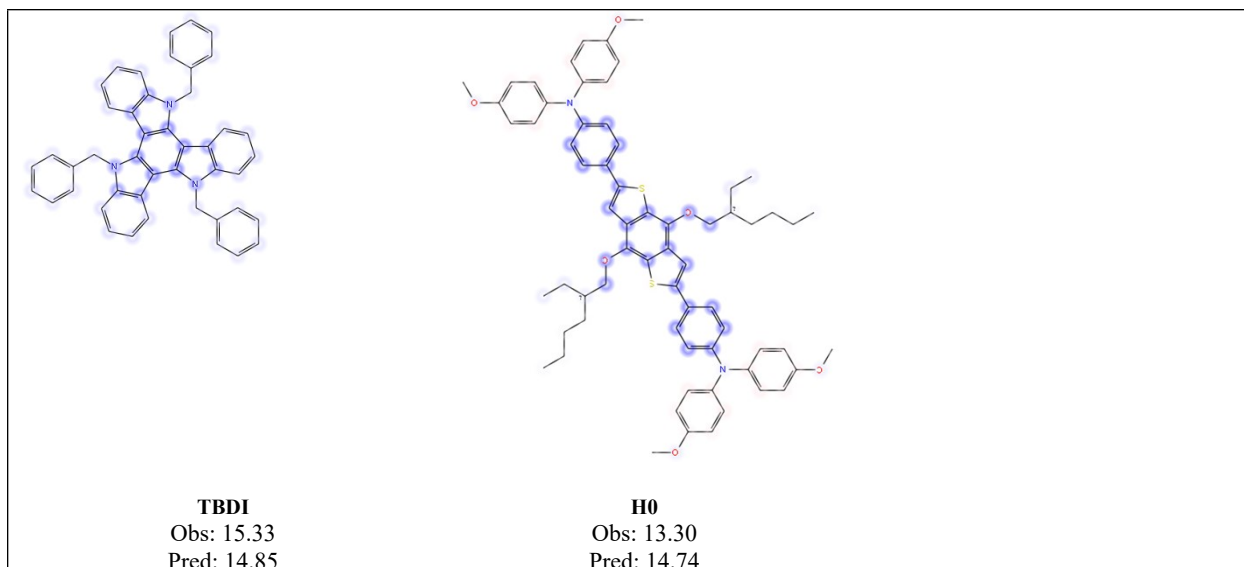

**Figure S3.** Visualization of atomic effects for KPLS model built for the power conversion efficiency from linear fingerprints for dopant free HTMs used in inverted (p-i-n) PSCs based on MAPbX<sub>3</sub>. Prediction of Marcus theory reorganization energies *are* shown with positive or negative site contributions shown as red and blue, respectively.

### 3- Visualizing Conventional (n-i-p) PSCs based on mixed cation lead halide for PCE.

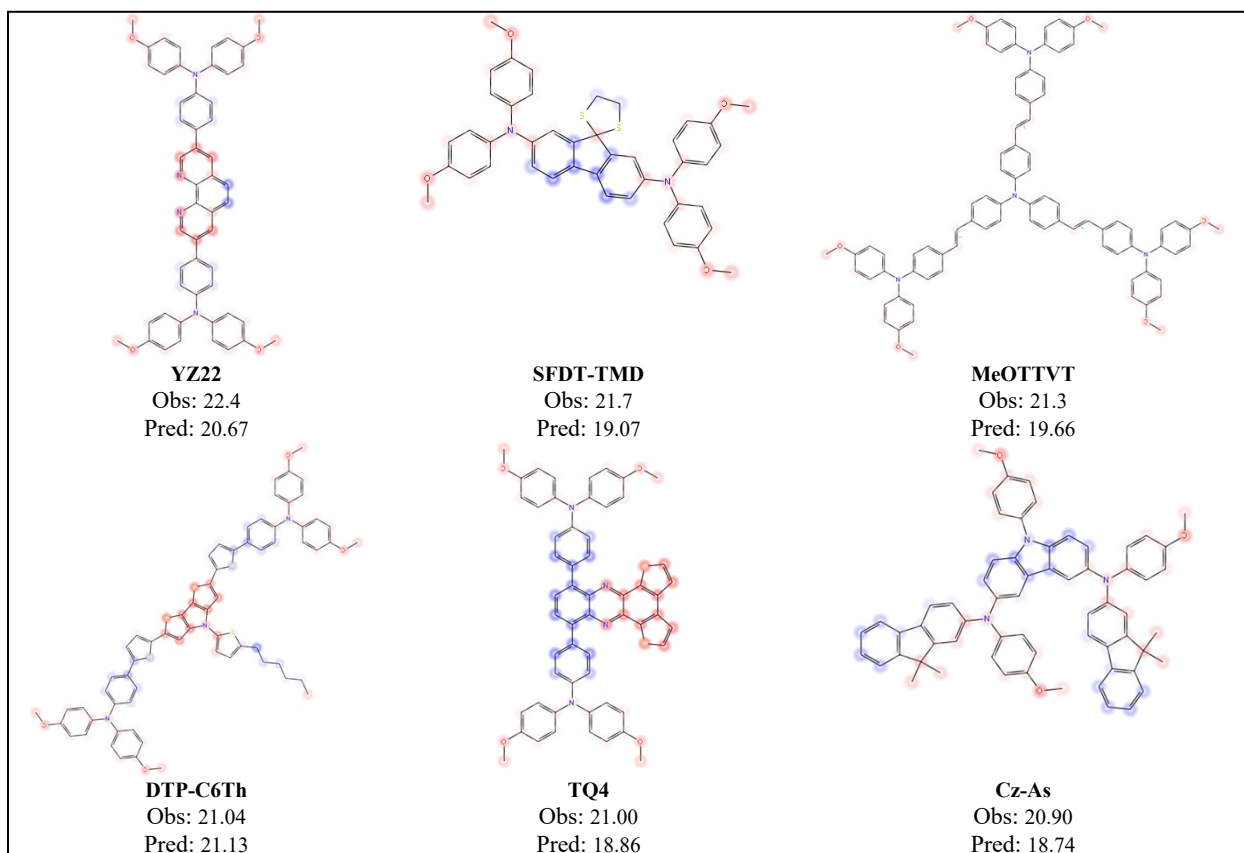

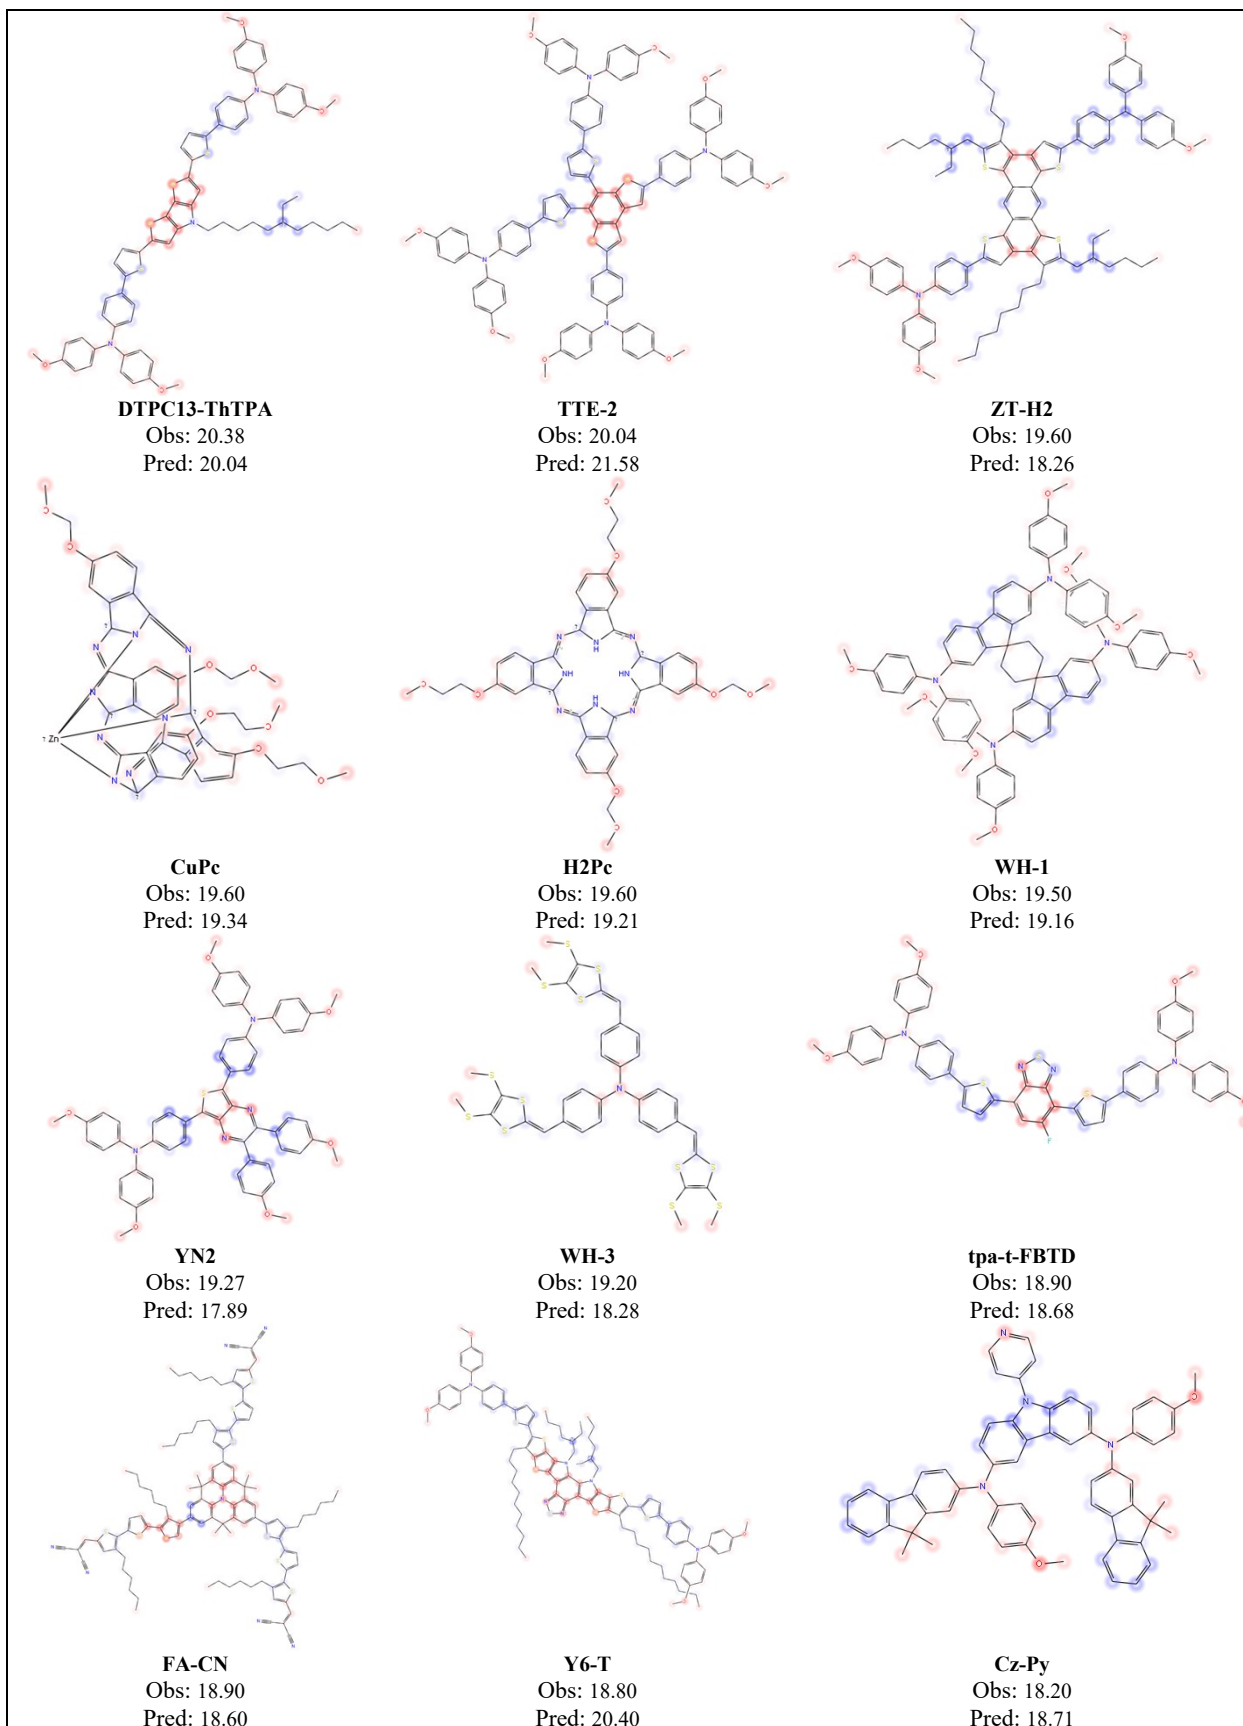



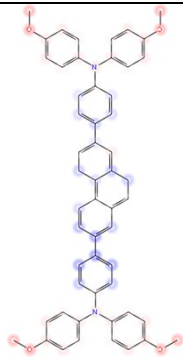

**YZ18**  
Obs: 18.10  
Pred: 18.39

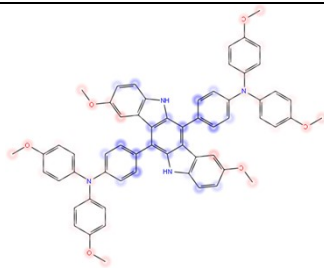

**C202**  
Obs: 17.70  
Pred: 18.10

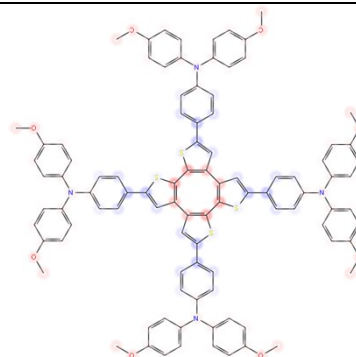

**$\alpha, \beta$ -COTh-Ph-OMeTAD**  
Obs: 17.20  
Pred: 20.56

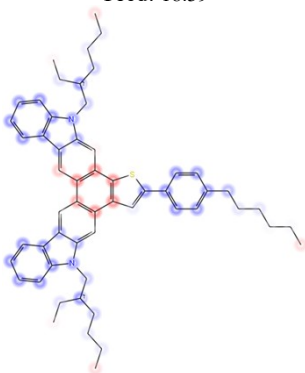

**C302**  
Obs: 16.40  
Pred: 16.03

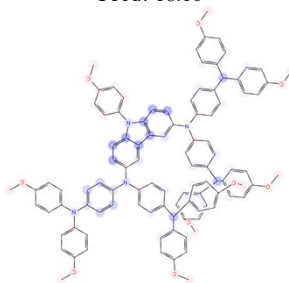

**PhCz-4MeOTPA**  
Obs: 16.00  
Pred: 17.11

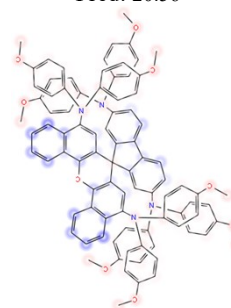

**X62**  
Obs: 15.90  
Pred: 18.41

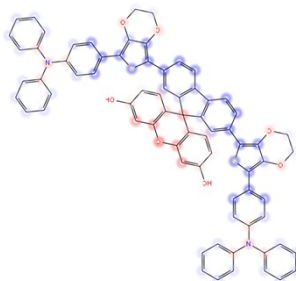

**Spiro-1A**  
Obs: 15.70  
Pred: 14.13

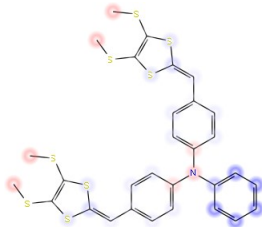

**WH-2**  
Obs: 15.30  
Pred: 17.39

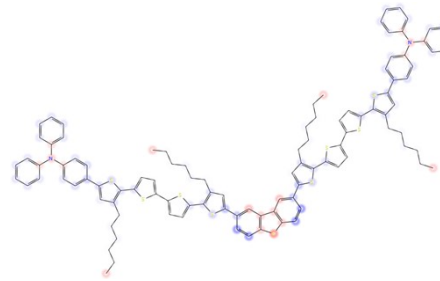

**DBT(QT-TPA)<sub>2</sub>**  
Obs: 13.60  
Pred: 14.92

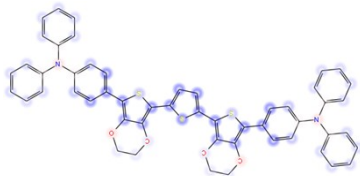

**T(EDOT-TPA)<sub>2</sub>**  
Obs: 12.30  
Pred: 13.70

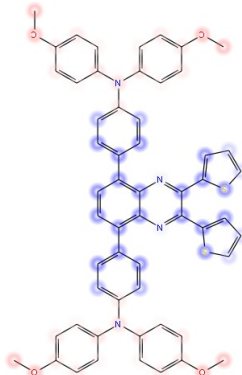

**TQ3**  
Obs: 10.80  
Pred: 10.23

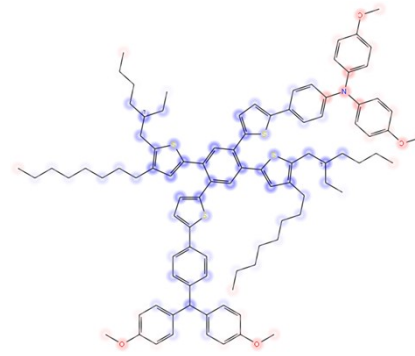

**ZT-H1**  
Obs: 10.00  
Pred: 10.36

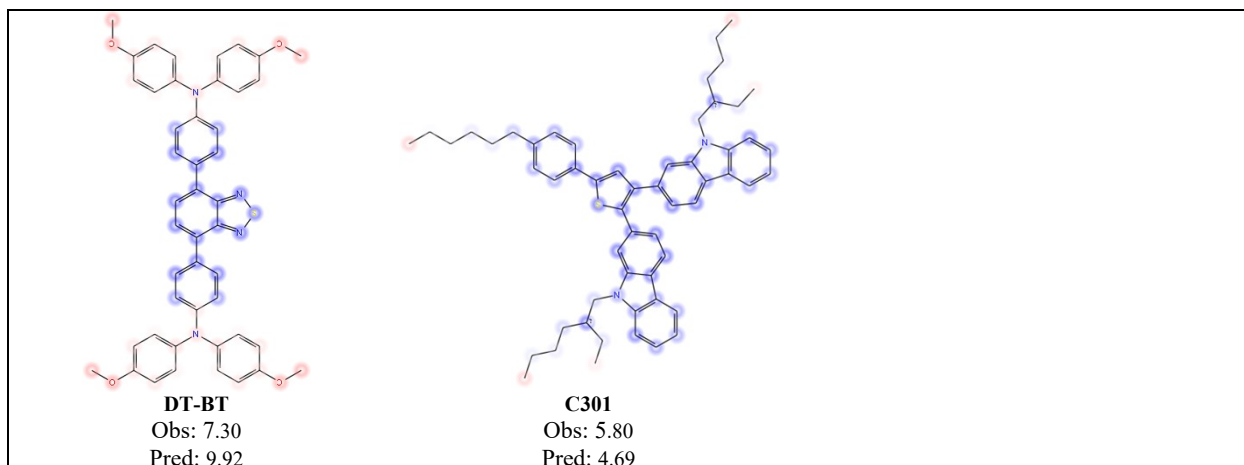

**Figure S4.** Visualization of atomic effects for KPLS model built for the power conversion efficiency from dendritic fingerprints for dopant free HTMs used in conventional (n-i-p) PSCs based on mixed cation lead halide. Prediction of Marcus theory reorganization energies are shown with positive or negative site contributions shown as red and blue, respectively.

#### 4- Visualizing Inverted (p-i-n) PSCs based on mixed cation lead halide for PCE.

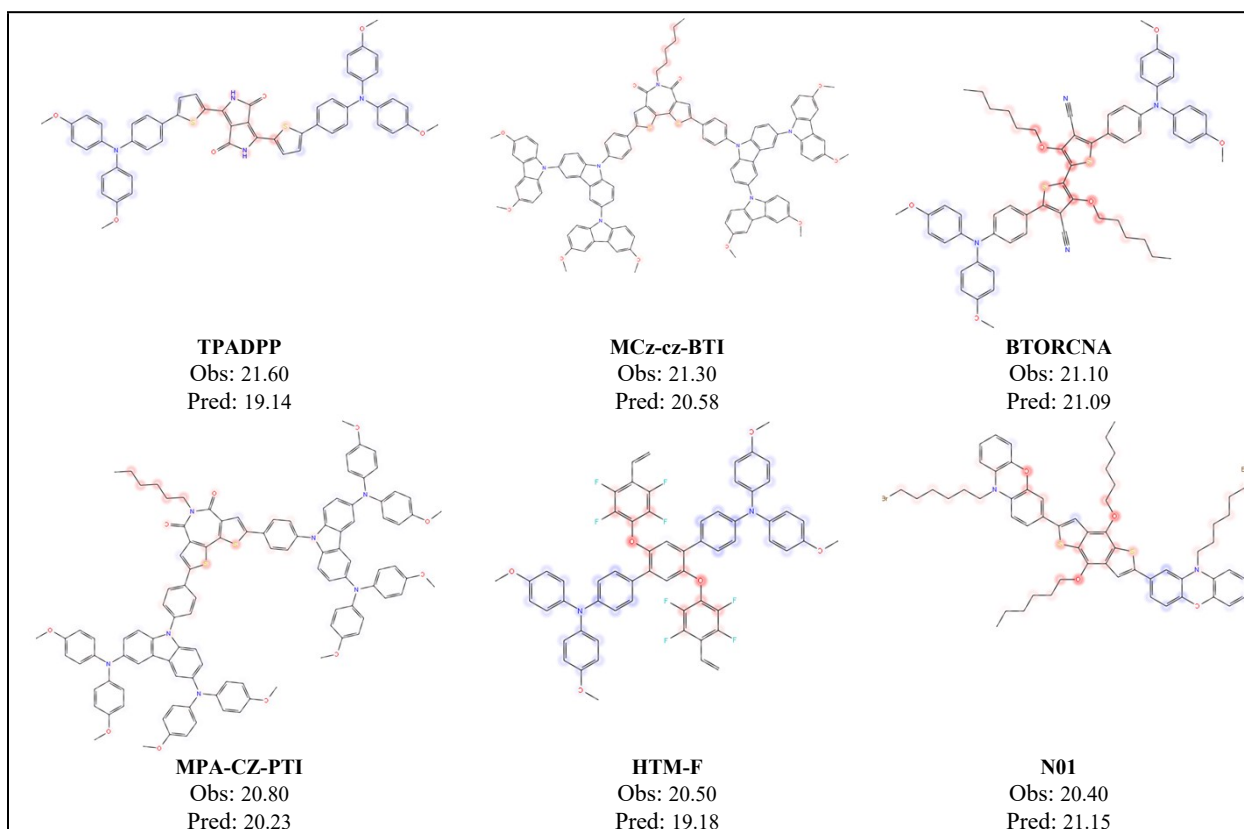



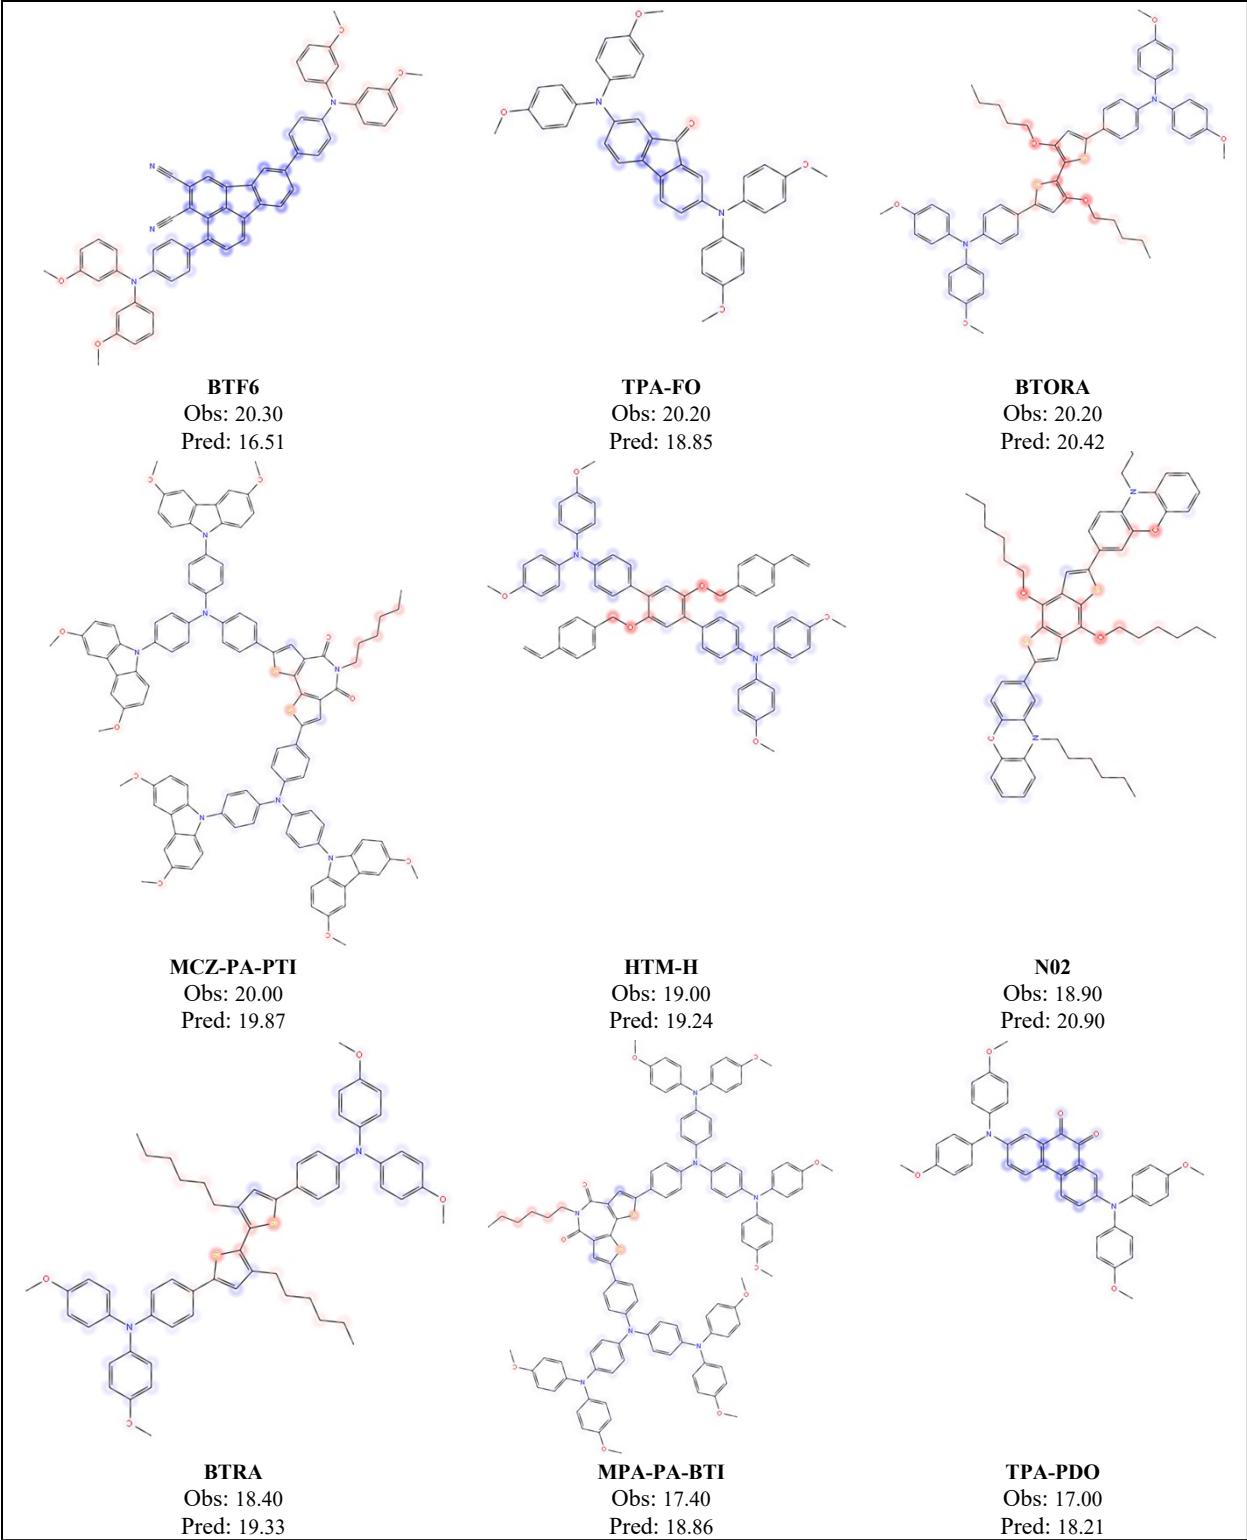

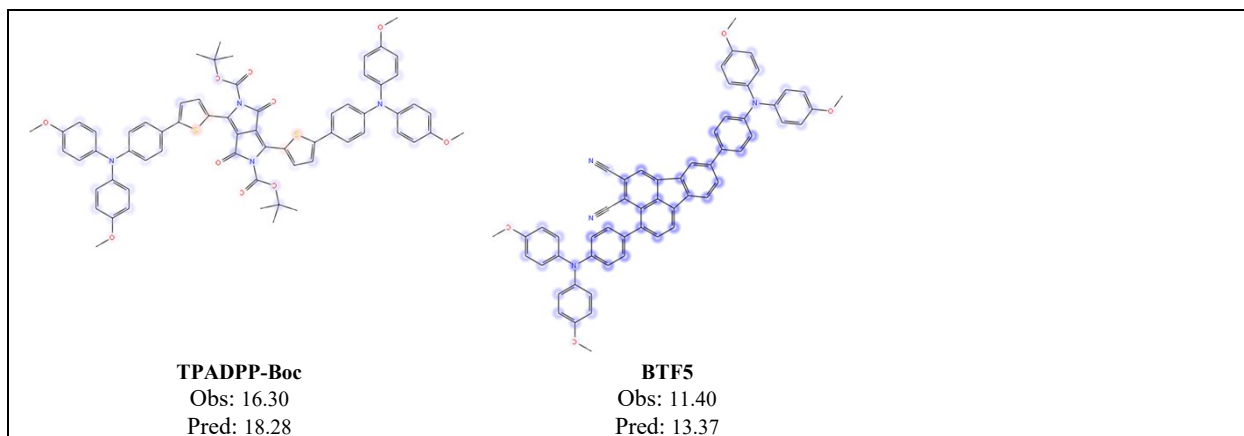

**Figure S5.** Visualization of atomic effects for KPLS model built for the power conversion efficiency from linear fingerprints for dopant free HTMs used in inverted (p-i-n) PSCs based on mixed cation lead halide. Prediction of Marcus theory reorganization energies *are* shown with positive or negative site contributions shown as red and blue, respectively.

**Table (S11).** Experimental and predicted photovoltaic properties of the fabricated PSCs based on dopant-free HTMs for external model validation.

| Conventional PSCs based on MAPbX <sub>3</sub> Perovskite |                   |                   |                   |                               |                               |                               |                               |                               |                               |      |
|----------------------------------------------------------|-------------------|-------------------|-------------------|-------------------------------|-------------------------------|-------------------------------|-------------------------------|-------------------------------|-------------------------------|------|
| HTM                                                      | PCE <sup>ex</sup> | PCE <sup>AP</sup> | PCE <sup>CP</sup> | J <sub>sc</sub> <sup>ex</sup> | J <sub>sc</sub> <sup>AP</sup> | J <sub>sc</sub> <sup>CP</sup> | V <sub>oc</sub> <sup>ex</sup> | V <sub>oc</sub> <sup>AP</sup> | V <sub>oc</sub> <sup>CP</sup> | Ref  |
| CB                                                       | 20.76             | 16.802            | 16.59             | 23.72                         | 22.386                        | 22.14                         | 1.15                          | 1.032                         | 1.06                          | [79] |
| DERDTS-TBDT                                              | 16.2              | 16.873            | 15.86             | 21.2                          | 22.061                        | 21.78                         | 1.05                          | 1.044                         | 0.99                          | [80] |
| ST1                                                      | 15.4              | 18.675            | 16.77             | 21.07                         | 22.296                        | 20.91                         | 1.059                         | 1.094                         | 1.08                          | [81] |
| mDPA-DBTP                                                | 18.9              | 19.232            | 16.31             | 21.1                          | 22.91                         | 22.60                         | 1.12                          | 1.082                         | 1.02                          | [82] |
| TPA-BPFN-TPA                                             | 18.4              | 18.165            | 17.85             | 22.7                          | 22.251                        | 21.87                         | 1.04                          | 1.041                         | 1.033                         | [83] |
| Inverted PSCs based on MAPbX <sub>3</sub> Perovskite     |                   |                   |                   |                               |                               |                               |                               |                               |                               |      |
| TTA                                                      | 16.7              | 17.84             | 18.32             | 20.4                          | 21.413                        | 20.88                         | 1.04                          | 1.054                         | 1.071                         | [84] |
| TM-2                                                     | 16.13             | 19.044            | 18.70             | 20.08                         | 22.562                        | 22.55                         | 1.04                          | 1.072                         | 1.040                         | [85] |
| TM-3                                                     | 15.78             | 18.91             | 18.82             | 20.27                         | 22.571                        | 22.58                         | 1.01                          | 1.07                          | 1.046                         | [85] |
| YJS001                                                   | 17.02             | 15.639            | 17.28             | 21.97                         | 21.557                        | 21.45                         | 1.052                         | 1.005                         | 1.060                         | [86] |
| YJS003                                                   | 20.11             | 15.726            | 17.68             | 22.94                         | 21.567                        | 21.70                         | 1.091                         | 1.016                         | 1.073                         | [86] |
| Conventional PSCs based on mixed lead halide Perovskite  |                   |                   |                   |                               |                               |                               |                               |                               |                               |      |
| M3                                                       | 15.6              | 17.385            | 17.23             | 20.7                          | 23.767                        | 22.81                         | 1.085                         | 1.042                         | 1.047                         | [87] |
| TPA-CN                                                   | 17.5              | 16.553            | 15.23             | 20.85                         | 20.845                        | 21.24                         | 1.09                          | 1.068                         | 1.060                         | [88] |
| RSe-CF                                                   | 12.4              | 15.307            | 13.75             | 17.37                         | 21.532                        | 20.78                         | 1.10                          | 1.021                         | 0.996                         | [89] |
| RSe-R                                                    | 15.9              | 15.752            | 14.22             | 21.27                         | 21.593                        | 21.00                         | 1.12                          | 1.033                         | 1.016                         | [89] |
| CZ-TA                                                    | 18.32             | 16.717            | 16.45             | 21.6                          | 21.735                        | 22.65                         | 1.04                          | 1.039                         | 1.041                         | [90] |
| Inverted PSCs based on mixed lead halide Perovskite      |                   |                   |                   |                               |                               |                               |                               |                               |                               |      |
| TFM                                                      | 16.03             | 17.528            | 16.32             | 22.6                          | 21.639                        | 21.87                         | 0.97                          | 1.023                         | 0.964                         | [91] |
| MPA-PA-BTI                                               | 17.41             | 19.099            | 18.71             | 22.1                          | 22.708                        | 22.65                         | 0.99                          | 1.037                         | 1.004                         | [92] |
| MPA-Cz-BTI                                               | 20.81             | 20.509            | 19.90             | 22.8                          | 23.165                        | 22.74                         | 1.07                          | 1.074                         | 1.062                         | [92] |
| MCz-PA-BTI                                               | 20.09             | 20.894            | 19.82             | 22.6                          | 23.074                        | 22.89                         | 1.08                          | 1.088                         | 1.055                         | [92] |
| MCz-Cz-BTI                                               | 21.35             | 21.234            | 20.57             | 23.2                          | 23.271                        | 23.10                         | 1.10                          | 1.097                         | 1.098                         | [92] |

Where PCE<sup>ex</sup>, J<sub>sc</sub><sup>ex</sup>, and V<sub>oc</sub><sup>ex</sup> are the experimental photovoltaic parameters. PCE<sup>AP</sup>, J<sub>sc</sub><sup>AP</sup>, and V<sub>oc</sub><sup>AP</sup> are the predicted photovoltaic parameters using the models that were developed from unclassified HTMs database. PCE<sup>CP</sup>, J<sub>sc</sub><sup>CP</sup>, and V<sub>oc</sub><sup>CP</sup> are the predicted photovoltaic parameters utilizing the models that were developed based on classified HTMs database.

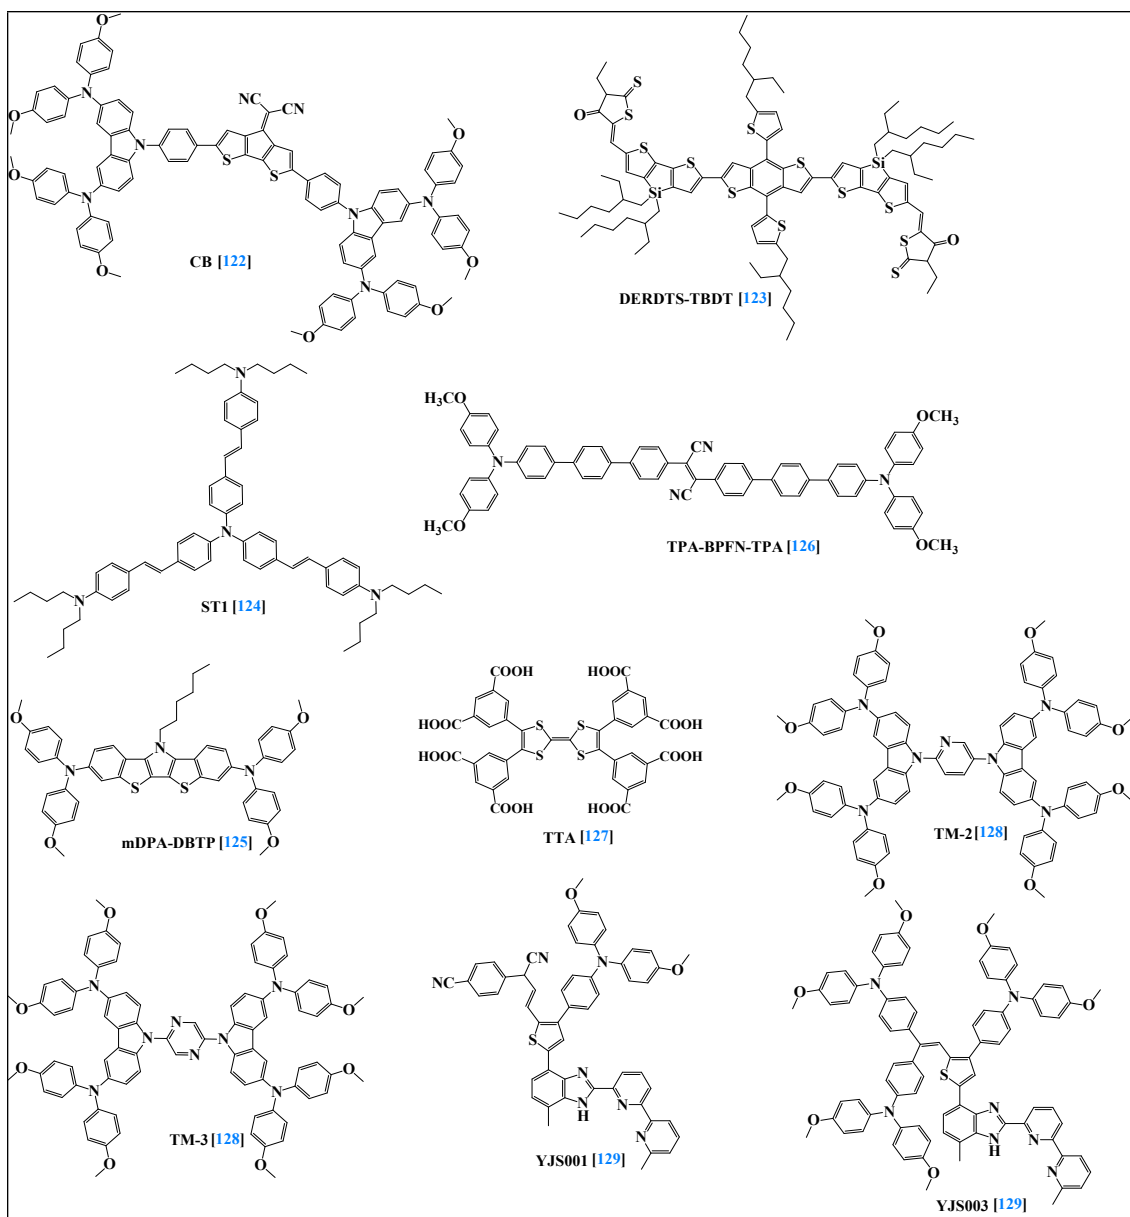

**Fig. S6.** Chemical Structures of the HTMs used for the validation of the ML model based on PSCs fabricated in MALHs for conventional (n-i-p) and inverted (p-i-n).

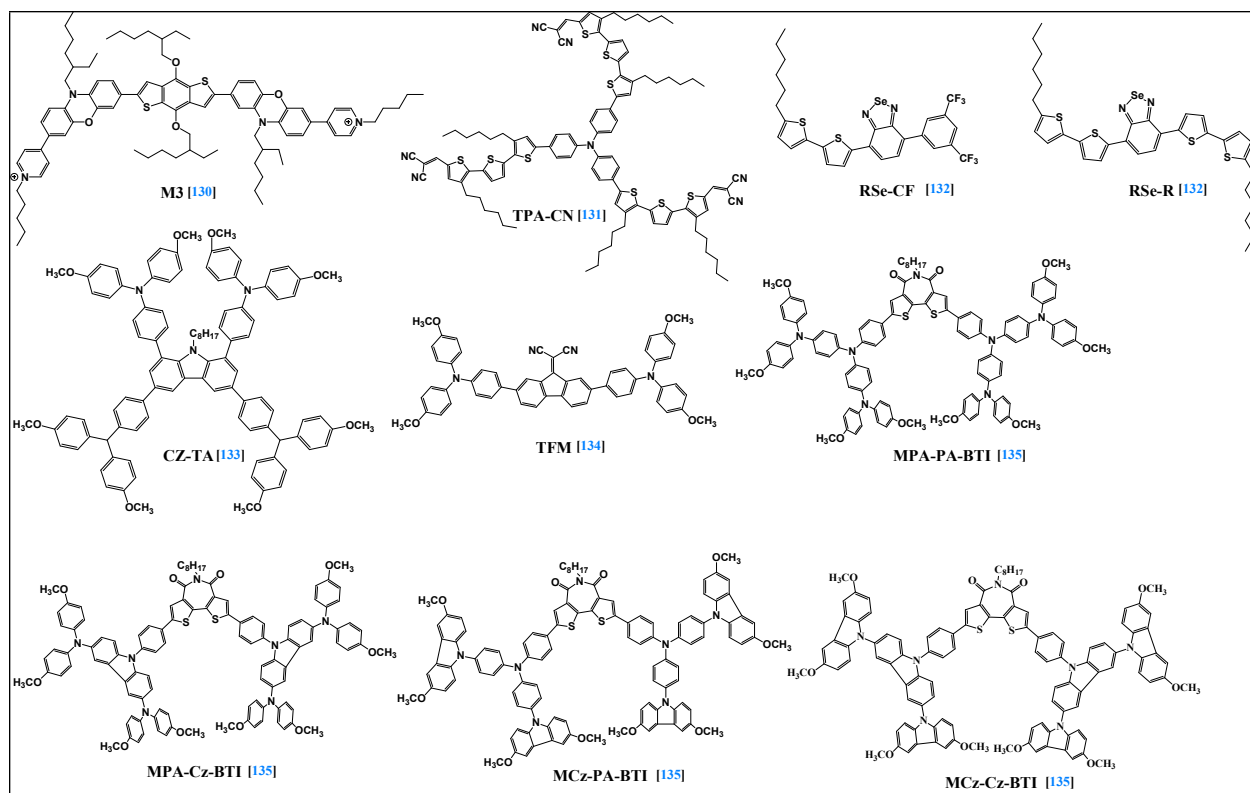

**Fig. S7.** Chemical structures of the HTMs utilized for the validation of ML model. This model is based on the performance of PSCs based on mixed CLHs for conventional (n-i-p) and inverted (p-i-n) devices.

## ***List of Developed AutoQSPR Models and Calculated Molecular Descriptors in a Machine-Readable Format.***

These model files can be used with the AutoQSPAR tool in the Schrödinger Suite 2023-4 Release: Maestro 13.3 to apply the consensus or top-ranked QSPR models for compounds input in SMILES, 2D or 3D structure files.

### **1. AutoQSPR Models for HTMs Without Considering the Fabrication Method of PSCs**

#### **1.1. 3D Molecular Descriptors**

- Access of the calculated 3D molecular descriptors for dopant-free HTMs along with their PSCs photovoltaic properties [\[here\]](#).

1.1.1. Developed autoQSPR model for the short circuit current ( $J_{SC}$ ) utilizing the 3D descriptors: [\[link\]](#).

1.1.2. Developed autoQSPR model for the power conversion efficiency ( $PCE$ ) utilizing the 3D descriptors: [\[link\]](#).

1.1.3. Developed autoQSPR model for the open circuit voltage ( $V_{OC}$ ) utilizing the 3D descriptors: [\[link\]](#).

## 1.2. 1D, and 2D Molecular Descriptors

- Access the calculated 1D, and 2D molecular descriptors for dopant-free HTMs along with their photovoltaic properties [\[here\]](#).

1.2.1. Developed autoQSPR model for the  $J_{SC}$  utilizing 1D, and 2D descriptors: [\[link\]](#).

1.2.2. Developed autoQSPR model for the  $PCE$  utilizing 1D, and 2D descriptors: [\[link\]](#).

1.2.3. Developed autoQSPR model for the  $V_{OC}$  utilizing 1D, and 2D descriptors: [\[link\]](#).

## 1.3. 1D, 2D, and 3D Molecular Descriptors

- Access the calculated 1D, 2D, and 3D molecular descriptors for dopant-free HTMs along with their photovoltaic properties [\[here\]](#).

1.3.1. Developed autoQSPR model for the  $J_{SC}$  utilizing the 1D, 2D, and 3D descriptors: [\[link\]](#).

1.3.2. Developed autoQSPR model for the  $PCE$  utilizing the 1D, 2D, and 3D descriptors: [\[link\]](#).

1.3.3. Developed autoQSPR model for the  $V_{OC}$  utilizing the 1D, 2D, 3D descriptors: [\[link\]](#).

## 1.4. 2D Binary Fingerprints Descriptors.

- These descriptors automatically calculated using the Schrödinger suite (Schrödinger Release 2023-4: Maestro 13.3: Schrodinger LLC, New York, NY, USA) with the AutoQSPR tool.

1.4.1. Developed autoQSPR model for the  $J_{SC}$  utilizing binary fingerprints descriptors: [\[link\]](#).

1.4.2. Developed autoQSPR model for the  $PCE$  utilizing binary fingerprints descriptors: [\[link\]](#).

1.4.3. Developed autoQSPR model for the  $V_{OC}$  utilizing binary fingerprints descriptors: [\[link\]](#).

## 2. AutoQSPR Models for HTMs Considering the Fabrication Methods of PSCs Utilizing 2D Binary Fingerprints Descriptors

### 2.1. Conventional (n-i-p) PSCs Based on $MAPbX_3$

2.1.1. Developed autoQSPR model for the  $J_{SC}$ : [\[link\]](#).

2.1.2. Developed autoQSPR model for the  $PCE$ : [\[link\]](#).

2.1.3. Developed autoQSPR model for the  $V_{OC}$ : [\[link\]](#).

## 2.2. Inverted (p-i-n) PSCs Based on MAPbX<sub>3</sub>

2.2.1. Developed autoQSPR model for the  $J_{SC}$ : [\[link\]](#).

2.2.2. Developed autoQSPR model for the PCE: [\[link\]](#).

2.2.3. Developed autoQSPR model for the  $V_{OC}$ : [\[link\]](#).

## 2.3. Conventional (n-i-p) PSCs Based on Mixed Cation Lead Halide

2.3.1. Developed autoQSPR model for the  $J_{SC}$ : [\[link\]](#).

2.3.2. Developed autoQSPR model for the PCE: [\[link\]](#).

2.3.3. Developed autoQSPR model for the  $V_{OC}$ : [\[link\]](#).

## 2.4. Inverted (p-i-n) PSCs based on mixed cation lead halide

2.4.1. Developed autoQSPR model for the  $J_{SC}$ : [\[link\]](#).

2.4.2. Developed autoQSPR model for the PCE: [\[link\]](#).

2.4.3. Developed autoQSPR model for the  $V_{OC}$ : [\[link\]](#).

## References:

1. A. F. Latypova, N. A. Emelianov, D. O. Balakirev, P. K. Sukhorukova, N. K. Kalinichenko, P. M. Kuznetsov, Y. N. Luponosov, S. M. Aldoshin, S. A. Ponomarenko, P. A. Troshin and L. A. Frolova, *ACS Appl Energy Mater*, 2022, 5, 5395–5403.
2. K. M. Lee, J. Y. Yang, P. S. Lai, K. J. Luo, T. Y. Yang, K. L. Liao, S. Y. Abate and Y. D. Lin, *Chemical Communications*, 2021, 57, 6444–6447.
3. X. Sun, F. Wu, C. Zhong, L. Zhu and Z. Li, *Chem Sci*, 2019, 10, 6899–6907.
4. J. Chen, J. Xia, H. J. Yu, J. X. Zhong, X. K. Wu, Y. S. Qin, C. Jia, Z. She, D. Bin Kuang and G. Shao, *Chemistry of Materials*, 2019, 31, 5431–5441.
5. H. D. Pham, S. M. Jain, M. Li, Z. K. Wang, S. Manzhos, K. Feron, S. Pitchaimuthu, Z. Liu, N. Motta, J. R. Durrant and P. Sonar, *Adv Electron Mater*, 2020, 6, 1900884.
6. H. D. Pham, S. M. Jain, M. Li, S. Manzhos, K. Feron, S. Pitchaimuthu, Z. Liu, N. Motta, H. Wang, J. R. Durrant and P. Sonar, *J Mater Chem A Mater*, 2019, 7, 5315–5323.
7. Y. Li, K. R. Scheel, R. G. Clevenger, W. Shou, H. Pan, K. V. Kilway and Z. Peng, *Adv Energy Mater*, 2018, 8, 1801248.
8. F. Liu, F. Wu, Z. Tu, Q. Liao, Y. Gong, L. Zhu, Q. Li and Z. Li, *Adv Funct Mater*, 2019, 29, 1901296.
9. M. Sasikumar, G. Maddala, M. Ambapuram, M. Subburu, J. R. Vaidya, S. N. Babu, P. Chetti, R. Mitty and S. Pola, *Sustain Energy Fuels*, 2020, 4, 4754–4767.
10. H. D. Pham, T. T. Do, J. Kim, C. Charbonneau, S. Manzhos, K. Feron, C. Tsoi, J. R. Durrant, S. M. Jain, P. Sonar, H. D. Pham, T. T. Do, P. Sonar, J. Kim, J. R. Durrant, C. Charbonneau, W. C. Tsoi, S. M. Jain, S. Manzhos and K. Feron, *Adv Energy Mater*, 2018, 8, 1703007.

11. Z. Li, Z. Zhu, C. C. Chueh, S. B. Jo, J. Luo, S. H. Jang and A. K. Y. Jen, *J Am Chem Soc*, 2016, 138, 11833–11839.
12. M. Sasikumar, G. Maddala, M. Ambapuram, M. Subburu, J. R. Vaidya, S. N. Babu, P. Chetti, R. Mitty and S. Pola, *Sustain Energy Fuels*, 2020, 4, 4754–4767.
13. F. Zhang, C. Yi, P. Wei, X. Bi, J. Luo, G. Jacopin, S. Wang, X. Li, Y. Xiao, S. M. Zakeeruddin and M. Grätzel, *Adv Energy Mater*, 2016, 6, 1600401.
14. F. Zhang, X. Liu, C. Yi, D. Bi, J. Luo, S. Wang, X. Li, Y. Xiao, S. M. Zakeeruddin and M. Grätzel, *ChemSusChem*, 2016, 9, 2578–2585.
15. Q. Chen, P. Cheng, H. Liu and X. Liu, *Sustain Energy Fuels*, 2021, 5, 3403–3413.
16. Y. Fu, Y. Sun, H. Tang, L. Wang, H. Yu and D. Cao, *Dyes and Pigments*, 2021, 191, 109339.
17. S. Kazim, F. J. Ramos, P. Gao, M. K. Nazeeruddin, M. Grätzel and S. Ahmad, *Energy Environ Sci*, 2015, 8, 1816–1823.
18. Y. Liu, Q. Chen, H. S. Duan, H. Zhou, Y. Yang, H. Chen, S. Luo, T. Bin Song, L. Dou, Z. Hong and Y. Yang, *J Mater Chem A Mater*, 2015, 3, 11940–11947.
19. M. Franckevičius, A. Mishra, F. Kreuzer, J. Luo, S. M. Zakeeruddin and M. Grätzel, *Mater Horiz*, 2015, 2, 613–618.
20. J. Liu, Y. Wu, C. Qin, X. Yang, T. Yasuda, A. Islam, K. Zhang, W. Peng, W. Chen and L. Han, *Energy Environ Sci*, 2014, 7, 2963–2967.
21. Y. Wang, Q. Chen, J. Fu, Z. Liu, Z. Sun, S. Zhang, Y. Zhu, X. Jia, J. Zhang, N. Yuan, Y. Zhou, B. Song and Y. Li, *Chemical Engineering Journal*, 2022, 433, 133265.
22. Y. Wang, W. Chen, L. Wang, B. Tu, T. Chen, B. Liu, K. Yang, C. W. Koh, X. Zhang, H. Sun, G. Chen, X. Feng, H. Y. Woo, A. B. Djurišić, Z. He and X. Guo, *Advanced Materials*, 2019, 31, 1902781.
23. J. Zhang, Q. Sun, Q. Chen, Y. Wang, Y. Zhou, B. Song, X. Jia, Y. Zhu, S. Zhang, N. Yuan, J. Ding and Y. Li, *Solar RRL*, 2020, 4, 1900421.
24. K. Jiang, J. Wang, F. Wu, Q. Xue, Q. Yao, J. Zhang, Y. Chen, G. Zhang, Z. Zhu, H. Yan, L. Zhu, H.-L. Yip, K. Jiang, F. Wu, L. Zhu, J. Zhang, H. Yan, J. Wang, Z. Zhu, Q. Xue, Q. Yao, H. Yip, Y. Chen and G. Zhang, *Advanced Materials*, 2020, 32, 1908011.
25. Y. Cao, Y. Li, T. Morrissey, B. Lam, B. O. Patrick, D. J. Dvorak, Z. Xia, T. L. Kelly and C. P. Berlinguette, *Energy Environ Sci*, 2019, 12, 3502–3507.
26. Q. Sun, J. Zhang, Q. Chen, Y. Wang, Y. Zhou, B. Song, X. Jia, N. Yuan, J. Ding and Y. Li, *J Power Sources*, 2020, 449, 227488.
27. Z. Zhou, Q. Wu, R. Cheng, H. Zhang, S. Wang, M. Chen, M. Xie, P. Kwok Leung Chan, M. Grätzel, S.-P. Feng, Z. Zhou, R. Cheng, S. Wang, M. Chen, P. K. L Chan, S. Feng, H. Zhang, M. Grätzel, Q. Wu and M. Xie, *Adv Funct Mater*, 2021, 31, 2011270.
28. Y. K. Wang, H. Ma, Q. Chen, Q. Sun, Z. Liu, Z. Sun, X. Jia, Y. Zhu, S. Zhang, J. Zhang, N. Yuan, J. Ding, Y. Zhou, B. Song and Y. Li, *ACS Appl Mater Interfaces*, 2021, 13, 7705–7713.
29. J. Yuan, Y. Chen, X. Liu and S. Xue, *ACS Appl Energy Mater*, 2021, 4, 5756–5766.
30. Y. Chen, X. Xu, N. Cai, S. Qian, R. Luo, Y. Huo and S. W. Tsang, *Adv Energy Mater*, 2019, 9, 1901268.

31. J. Zhang, Q. Sun, Q. Chen, Y. Wang, Y. Zhou, B. Song, N. Yuan, J. Ding, Y. Li, J. Zhang, Q. Sun, Y. Wang, N. Yuan, J. Ding, Q. Chen, B. Song, Y. Zhou and Y. Li, *Adv Funct Mater*, 2019, 29, 1900484.
32. L. Yang, F. Cai, Y. Yan, J. Li, D. Liu, A. J. Pearson, T. Wang, L. Yang, F. Cai, Y. Yan, J. Li, T. Wang, D. Liu and A. J. Pearson, *Adv Funct Mater*, 2017, 27, 1702613.
33. X. Yang, J. Xi, Y. Sun, Y. Zhang, G. Zhou and W. Y. Wong, *Nano Energy*, 2019, 64, 103946.
34. Y. Zhang, C. Kou, J. Zhang, Y. Liu, W. Li, Z. Bo and M. Shao, *J Mater Chem A Mater*, 2019, 7, 5522–5529.
35. C. Huang, W. Fu, C. Z. Li, Z. Zhang, W. Qiu, M. Shi, P. Heremans, A. K. Y. Jen and H. Chen, *J Am Chem Soc*, 2016, 138, 2528–2531.
36. Z. Li, Y. Tong, J. Ren, Q. Sun, Y. Tian, Y. Cui, H. Wang, Y. Hao and C. S. Lee, *Chemical Engineering Journal*, 2020, 402, 125923.
37. L. Duan, Y. Chen, J. Jia, X. Zong, Z. Sun, Q. Wu and S. Xue, *ACS Appl Energy Mater*, 2020, 3, 1672–1683.
38. R. Chen, T. Bu, J. Li, W. Li, P. Zhou, X. Liu, Z. Ku, J. Zhong, Y. Peng, F. Huang, Y. B. Cheng and Z. Fu, *ChemSusChem*, 2018, 11, 1467–1473.
39. S. J. Park, S. Jeon, I. K. Lee, J. Zhang, H. Jeong, J. Y. Park, J. Bang, T. K. Ahn, H. W. Shin, B. G. Kim and H. J. Park, *J Mater Chem A Mater*, 2017, 5, 13220–13227.
40. J. Yuan, Y. Chen, X. Liu and S. Xue, *ACS Appl Energy Mater*, 2021, 4, 5756–5766.
41. H. D. Pham, L. Gil-Escrig, K. Feron, S. Manzhos, S. Albrecht, H. J. Bolink and P. Sonar, *J Mater Chem A Mater*, 2019, 7, 12507–12517.
42. Q. Chen, X. Li, T. Jiu, S. Ma, J. Li, X. Xiao and W. Zhang, *Dyes and Pigments*, 2017, 147, 113–119.
43. H. Chen, W. Fu, C. Huang, Z. Zhang, S. Li, F. Ding, M. Shi, C. Z. Li, A. K. Y. Jen and H. Chen, *Adv Energy Mater*, 2017, 7, 1700012.
44. H. D. Pham, H. Hu, K. Feron, S. Manzhos, H. Wang, Y. M. Lam and P. Sonar, *Solar RRL*, 2017, 1, 1700105.
45. S. S. Reddy, S. Shin, U. K. Aryal, R. Nishikubo, A. Saeki, M. Song and S. H. Jin, *Nano Energy*, 2017, 41, 10–17.
46. L. Calió, C. Momblona, L. Gil-Escrig, S. Kazim, M. Sessolo, Á. Sastre-Santos, H. J. Bolink and S. Ahmad, *Solar Energy Materials and Solar Cells*, 2017, 163, 237–241.
47. B. X. Zhao, C. Yao, K. Gu, T. Liu, Y. Xia and Y. L. Loo, *Energy Environ Sci*, 2020, 13, 4334–4343.
48. J. Wang, X. Wu, Y. Liu, T. Qin, K. Zhang, N. Li, J. Zhao, R. Ye, Z. Fan, Z. Chi, Z. Zhu, J. Wang, X. Wu, Y. Liu, R. Ye, Z. Fan, Z. Zhu, T. Qin, Z. Chi, K. Zhang, N. Li and J. Zhao, *Adv Energy Mater*, 2021, 11, 2100967.
49. H. Zhu, Z. Shen, L. Pan, J. Han, F. T. Eickemeyer, Y. Ren, X. Li, S. Wang, H. Liu, X. Dong, S. M. Zakeeruddin, A. Hagfeldt, Y. Liu and M. Grätzel, *ACS Energy Lett*, 2021, 6, 208–215.
50. X. Yin, J. Zhou, Z. Song, Z. Dong, Q. Bao, N. Shrestha, S. Singh Bista, R. J. Ellingson, Y. Yan, W. Tang, X. Yin, J. Zhou, Z. Dong, W. Tang, Z. Song, N. Shrestha, S. S. Bista, R. J. Ellingson, Y. Yan and Q. Bao, *Adv Funct Mater*, 2019, 29, 1904300.



51. H. Guo, H. Zhang, C. Shen, D. Zhang, S. Liu, Y. Wu and W. H. Zhu, *Angewandte Chemie International Edition*, 2021, 60, 2674–2679.
52. C. Yang, H. Wang, Y. Miao, C. Chen, M. Zhai, Q. Bao, X. Ding, X. Yang and M. Cheng, *ACS Energy Lett*, 2021, 6, 2690–2696.
53. J. Zhou, X. Yin, Z. Dong, A. Ali, Z. Song, N. Shrestha, S. S. Bista, Q. Bao, R. J. Ellingson, Y. Yan and W. Tang, *Angewandte Chemie*, 2019, 131, 13855–13859.
54. C. Shen, Y. Wu, H. Zhang, E. Li, W. Zhang, X. Xu, W. Wu, H. Tian and W. H. Zhu, *Angewandte Chemie International Edition*, 2019, 58, 3784–3789.
55. Z. Chang, J. Guo, Q. Fu, T. Wang, R. Wang and Y. Liu, *Solar RRL*, 2021, 5, 2100184.
56. Z. Yu, L. Wang, X. Mu, C. C. Chen, Y. Wu, J. Cao and Y. Tang, *Angewandte Chemie International Edition*, 2021, 60, 6294–6299.
57. Z. Wan, J. Yang, J. Xia, H. Shu, X. Yao, J. Luo and C. Jia, *Chem Sci*, 2021, 12, 8548–8555.
58. P. Xu, P. Liu, Y. Li, B. Xu, L. Kloo, L. Sun and Y. Hua, *ACS Appl Mater Interfaces*, 2018, 10, 19697–19703.
59. Z. Wan, Y. Zhang, J. Yang, J. Xia, F. Lin, X. Yao, J. Luo and C. Jia, *Journal of Energy Chemistry*, 2022, 68, 293–299.
60. Y. Tian, L. Tao, C. Chen, H. Lu, H. Li, X. Yang and M. Cheng, *Dyes and Pigments*, 2021, 184, 108786.
61. S. Paek, P. Qin, Y. Lee, K. Taek Cho, P. Gao, G. Grancini, E. Oveisi, P. Gratia, K. Rakstys, S. A. Al-Muhtaseb, C. Ludwig, J. Ko, M. Khaja Nazeeruddin, S. Paek, P. Qin, Y. Lee, K. T. Cho, P. Gao, G. Grancini, P. Gratia, K. Rakstys, M. K. Nazeeruddin, C. Ludwig, E. Oveisi, S. A. Al-Muhtaseb and J. Ko, *Advanced Materials*, 2017, 29, 1606555.
62. J. Hai, H. Wu, X. Yin, J. Song, L. Hu, Y. Jin, L. Li, Z. Su, Z. Xu, H. Wang, Z. Li, J. Hai, H. Wu, L. Li, X. Yin, J. Song, L. Hu, Y. Jin, Z. Su, Z. Xu, Z. Li and H. Wang, *Adv Funct Mater*, 2021, 31, 2105458.
63. B. Cai, X. Yang, X. Jiang, Z. Yu, A. Hagfeldt and L. Sun, *J Mater Chem A Mater*, 2019, 7, 14835–14841.
64. X. Lai, F. Meng, Q. Q. Zhang, K. Wang, G. Li, Y. Wen, H. Ma, W. Li, X. Li, A. K. K. Kyaw, K. Wang, X. W. Sun, M. Du, X. Guo, J. Wang and W. Huang, *Solar RRL*, 2019, 3, 1900011.
65. B. Cai, J. An, M. Ge, S. Pan, W. Ji and X. Yang, *Org Electron*, 2021, 96, 106244.
66. L. Wang, J. Zhang, P. Liu, B. Xu, B. Zhang, H. Chen, A. K. Inge, Y. Li, H. Wang, Y. B. Cheng, L. Kloo and L. Sun, *Chemical Communications*, 2018, 54, 9571–9574.
67. I. M. Abdellah, T. H. Chowdhury, J. J. Lee, A. Islam, M. K. Nazeeruddin, M. Grätzel and A. El-Shafei, *Sustain Energy Fuels*, 2021, 5, 199–211.
68. I. M. Abdellah, T. H. Chowdhury, J. J. Lee, A. Islam and A. El-Shafei, *Solar Energy*, 2020, 206, 279–286.
69. Q. Fu, Z. Xu, X. Tang, T. Liu, X. Dong, X. Zhang, N. Zheng, Z. Xie and Y. Liu, *ACS Energy Lett*, 2021, 6, 1521–1532.
70. T. Niu, W. Zhu, Y. Zhang, Q. Xue, X. Jiao, Z. Wang, Y. M. Xie, P. Li, R. Chen, F. Huang, Y. Li, H. L. Yip and Y. Cao, *Joule*, 2021, 5, 249–269.

71. R. Li, C. Li, M. Liu, P. Vivo, M. Zheng, Z. Dai, J. Zhan, B. He, H. Li, W. Yang, Z. Zhou and H. Zhang, *CCS Chemistry*, 2022, 41, 3084–3094.
72. W. Chen, Y. Wang, B. Liu, Y. Gao, Z. Wu, Y. Shi, Y. Tang, K. Yang, Y. Zhang, W. Sun, X. Feng, F. Laquai, H. Y. Woo, A. B. Djurišić, X. Guo and Z. He, *Sci China Chem*, 2020, 64, 41–51.
73. K. Yang, Q. Liao, J. Huang, Z. Zhang, M. Su, Z. Chen, Z. Wu, D. Wang, Z. Lai, H. Y. Woo, Y. Cao, P. Gao and X. Guo, *Angewandte Chemie International Edition*, 2022, 61, e202113749.
74. J. Wu, M. Hu, L. zhang, G. Song, Y. Li, W. Tan, Y. Tian and B. Xu, *Chemical Engineering Journal*, 2021, 422, 130124.
75. N. Cai, F. Li, Y. Chen, R. Luo, T. Hu, F. Lin, S.-M. Yiu, D. Liu, D. Lei, Z. Zhu and A. K.-Y. Jen, *Angewandte Chemie*, 2021, 133, 20600–20605.
76. X. Yu, Z. Li, X. Sun, C. Zhong, Z. Zhu, Z. Li and A. K. Y. Jen, *Nano Energy*, 2021, 82, 105701.
77. J. Huang, J. Yang, H. Sun, K. Feng, Q. Liao, B. Li, H. Yan and X. Guo, *Chin J Chem*, 2021, 39, 1545–1552.
78. J. Wu, M. Hu, L. zhang, G. Song, Y. Li, W. Tan, Y. Tian and B. Xu, *Chemical Engineering Journal*, 2021, 422, 130124.
79. K. M. Lee, W. H. Chiu, Y. H. Tsai, C. S. Wang, Y. T. Tao and Y. D. Lin, *Chemical Engineering Journal*, 2022, 427, 131609.
80. Y. Yang, Y. Liu, Z. Hong, Q. Chen, H. Chen, W. H. Chang and T. Bin Song, *Adv Mater*, 2015, 28, 440–446.
81. X. Zhao, F. Zhang, C. Yi, D. Bi, X. Bi, P. Wei, J. Luo, X. Liu, S. Wang, X. Li, S. M. Zakeeruddin and M. Grätzel, *J Mater Chem A Mater*, 2016, 4, 16330–16334.
82. R. Azmi, S. Y. Nam, S. Sinaga, Z. A. Akbar, C. L. Lee, S. C. Yoon, I. H. Jung and S. Y. Jang, *Nano Energy*, 2018, 44, 191–198.
83. H. D. Pham, S. M. Jain, M. Li, Z. K. Wang, S. Manzhos, K. Feron, S. Pitchaimuthu, Z. Liu, N. Motta, J. R. Durrant and P. Sonar, *Adv Electron Mater*, 2020, 6, 1900884.
84. Q. Chen, X. Li, T. Jiu, S. Ma, J. Li, X. Xiao and W. Zhang, *Dyes and Pigments*, 2017, 147, 113–119.
85. Z. Gong, R. Wang, Y. Jiang, X. Kong, Y. Lin, Z. Xu, G. Zhou, J. M. Liu, K. Kempa and J. Gao, *Org Electron*, 2021, 92, 106102.
86. Y. S. Tingare, C. Su, J.-H. Lin, Y.-C. Hsieh, H.-J. Lin, Y.-C. Hsu, M.-C. Li, G.-L. Chen, K.-W. Tseng, Y.-H. Yang, L. Wang, H. Tsai, W. Nie, W.-R. Li, Y. S. Tingare, C. Su, H.-J. Lin, Y.-C. Hsu, M.-C. Li, J.-H. Lin, Y.-C. Hsieh, Y.-H. Yang, W.-R. Li, G.-L. Chen, K.-W. Tseng, L. Wang, H. Tsai and W. Nie, *Adv Funct Mater*, 2022, 32, 2201933.
87. M. Cheng, C. Chen, K. Aitola, F. Zhang, Y. Hua, G. Boschloo, L. Kloo and L. Sun, *Chemistry of Materials*, 2016, 28, 8631–8639.
88. S. Paek, P. Qin, Y. Lee, K. Taek Cho, P. Gao, G. Grancini, E. Oveisi, P. Gratia, K. Rakstys, S. A. Al-Muhtaseb, C. Ludwig, J. Ko, M. Khaja Nazeeruddin, S. Paek, P. Qin, Y. Lee, K. T. Cho, P. Gao, G. Grancini, P. Gratia, K. Rakstys, M. K. Nazeeruddin, C. Ludwig, E. Oveisi, S. A. Al-Muhtaseb and J. Ko, *Advanced Materials*, 2017, 29, 1606555.

89. Abdullah, E. B. Kim, M. S. Akhtar, H. S. Shin, S. Ameen and M. K. Nazeeruddin, *ACS Appl Energy Mater*, 2021, 4, 312–321.
90. X. Yin, L. Guan, J. Yu, D. Zhao, C. Wang, N. Shrestha, Y. Han, Q. An, J. Zhou, B. Zhou, Y. Yu, C. R. Grice, R. A. Awni, F. Zhang, J. Wang, R. J. Ellingson, Y. Yan and W. Tang, *Nano Energy*, 2017, 40, 163–169.
91. Y. Cao, W. Chen, H. Sun, D. Wang, P. Chen, A. B. Djurišić, Y. Zhu, B. Tu, X. Guo, B. Z. Tang and Z. He, *Solar RRL*, 2020, 4, 1900189.
92. W. Chen, Y. Wang, B. Liu, Y. Gao, Z. Wu, Y. Shi, Y. Tang, K. Yang, Y. Zhang, W. Sun, X. Feng, F. Laquai, H. Y. Woo, A. B. Djurišić, X. Guo and Z. He, *Sci China Chem*, 2020, 64, 41–51.
